# Supplementary material for: Multicentre prospective observational study protocol for radiation exposure from gastrointestinal fluoroscopic procedures (REX-GI study)
Source: PubMed Central journal article supplement — BMJ Open. 2020 Feb 26;10(2):e033604. doi: 10.1136/bmjopen-2019-033604 (PMC7202697; doi:10.1136/bmjopen-2019-033604), 2020-02-26
Supplement: bmjopen-2019-033604.draft_revisions.pdf [file bmjopen-2019-033604.draft_revisions.pdf]

# BMJ Open

BMJ Open is committed to open peer review. As part of this commitment we make the peer review history of every article we publish publicly available.

When an article is published we post the peer reviewers' comments and the authors' responses online. We also post the versions of the paper that were used during peer review. These are the versions that the peer review comments apply to.

The versions of the paper that follow are the versions that were submitted during the peer review process. They are not the versions of record or the final published versions. They should not be cited or distributed as the published version of this manuscript.

BMJ Open is an open access journal and the full, final, typeset and author-corrected version of record of the manuscript is available on our site with no access controls, subscription charges or pay-per-view fees (<http://bmjopen.bmj.com>).

If you have any questions on BMJ Open's open peer review process please email [info.bmjopen@bmj.com](mailto:info.bmjopen@bmj.com)

# BMJ Open

## A Multicenter Prospective Observational Study Protocol for Radiation Exposure from Gastrointestinal Fluoroscopic Procedures (REX-GI study)

|                               |                                                                                                                                                                                                                                                                                                                                                                                                                                                                                                                                                                                                                                                                                                                                                                                                                                                                                                                                                                                                                                                                                                                                                                                                                                                                                                                                                                                                                                                                                                                                                                                                                                                                                                                                                                                                                                                                                                                                                                                                                                                      |
|-------------------------------|------------------------------------------------------------------------------------------------------------------------------------------------------------------------------------------------------------------------------------------------------------------------------------------------------------------------------------------------------------------------------------------------------------------------------------------------------------------------------------------------------------------------------------------------------------------------------------------------------------------------------------------------------------------------------------------------------------------------------------------------------------------------------------------------------------------------------------------------------------------------------------------------------------------------------------------------------------------------------------------------------------------------------------------------------------------------------------------------------------------------------------------------------------------------------------------------------------------------------------------------------------------------------------------------------------------------------------------------------------------------------------------------------------------------------------------------------------------------------------------------------------------------------------------------------------------------------------------------------------------------------------------------------------------------------------------------------------------------------------------------------------------------------------------------------------------------------------------------------------------------------------------------------------------------------------------------------------------------------------------------------------------------------------------------------|
| Journal:                      | <i>BMJ Open</i>                                                                                                                                                                                                                                                                                                                                                                                                                                                                                                                                                                                                                                                                                                                                                                                                                                                                                                                                                                                                                                                                                                                                                                                                                                                                                                                                                                                                                                                                                                                                                                                                                                                                                                                                                                                                                                                                                                                                                                                                                                      |
| Manuscript ID                 | bmjopen-2019-033604                                                                                                                                                                                                                                                                                                                                                                                                                                                                                                                                                                                                                                                                                                                                                                                                                                                                                                                                                                                                                                                                                                                                                                                                                                                                                                                                                                                                                                                                                                                                                                                                                                                                                                                                                                                                                                                                                                                                                                                                                                  |
| Article Type:                 | Protocol                                                                                                                                                                                                                                                                                                                                                                                                                                                                                                                                                                                                                                                                                                                                                                                                                                                                                                                                                                                                                                                                                                                                                                                                                                                                                                                                                                                                                                                                                                                                                                                                                                                                                                                                                                                                                                                                                                                                                                                                                                             |
| Date Submitted by the Author: | 13-Aug-2019                                                                                                                                                                                                                                                                                                                                                                                                                                                                                                                                                                                                                                                                                                                                                                                                                                                                                                                                                                                                                                                                                                                                                                                                                                                                                                                                                                                                                                                                                                                                                                                                                                                                                                                                                                                                                                                                                                                                                                                                                                          |
| Complete List of Authors:     | <p>Nishida, Tsutomu ; Toyonaka Municipal Hospital, Department of Gastroenterology<br/> Hayashi, Shiro; Toyonaka Municipal Hospital, Department of Gastroenterology; Kento Hayashi Clinic, Department of Gastroenterology and Internal Medicine<br/> Takenaka, Mamoru ; Kindai University, Department of Gastroenterology and Hepatology<br/> Hosono, Makoto ; Kindai University, Department of Radiology<br/> Kogure, Hirofumi; The University of Tokyo, Department of Gastroenterology<br/> Hasatani, Kenkei ; Fukui Prefectural Hospital, Department of Gastroenterology<br/> Yamaguchi, Shinjiro ; Kansai Rosai Hospital, Department of Gastroenterology and Hepatology<br/> Maruyama, Hirotsugu ; Osaka City University, Department of Gastroenterology<br/> Doyama, Hisashi ; Ishikawa Prefectural Central Hospital, Department of Gastroenterology<br/> Ihara, Hideyuki ; Tonan Hospital, Department of Gastroenterology<br/> Yoshio, Toshiyuki ; Cancer Institute Hospital, Japanese Foundation for Cancer Research, Department of Gastroenterology<br/> Nagaike, Koji ; Suita Municipal Hospital, Department of Gastroenterology and Hepatology<br/> Yamada, Takuya ; Osaka Rosai Hospital, Department of Gastroenterology and Hepatology,<br/> Yakushijin, Takayuki ; Osaka General Medical Center, Department of Gastroenterology and Hepatology<br/> Takagi, Tadayuki ; Fukushima Medical University School of Medicine, Department of Gastroenterology<br/> Tsumura, Hidetaka ; Hyogo Cancer Center, Department of Gastroenterological Oncology,<br/> Kurita, Akira ; Kitano Hospital, Department of Gastroenterology and Hepatology, Digestive Disease Center<br/> Asai, Satoshi ; Tane General Hospital, Department of Gastroenterology<br/> Ito, Yukiko ; Japanese Red Cross Medical Center, Department of Gastroenterology<br/> Kuwai, Toshio ; Kure Medical Center, Department of Gastroenterology<br/> Hori, Yasuki ; Nagoya City University Graduate School of Medical Sciences Department of Gastroenterology and Metabolism</p> |

1  
2  
3  
4  
5  
6  
7  
8  
9  
10  
11  
12  
13  
14  
15  
16  
17  
18  
19  
20  
21  
22  
23  
24  
25  
26  
27  
28  
29  
30  
31  
32  
33  
34  
35  
36  
37  
38  
39  
40  
41  
42  
43  
44  
45  
46  
47  
48  
49  
50  
51  
52  
53  
54  
55  
56  
57  
58  
59  
60

|                  |                                                                                                                                                                                                                                                                                                                                                                                                                                                                                                                         |
|------------------|-------------------------------------------------------------------------------------------------------------------------------------------------------------------------------------------------------------------------------------------------------------------------------------------------------------------------------------------------------------------------------------------------------------------------------------------------------------------------------------------------------------------------|
|                  | <p>Maetani, Iruru ; Toho University Ohashi Medical Center, Division of Gastroenterology and Hepatology, Department of Internal Medicine<br/> Ikezawa, Kenji ; Osaka International Cancer Institute, Department of Hepatobiliary and Pancreatic Oncology<br/> Iwashita, Takuji ; Gifu University Hospital, First Department of Internal Medicine<br/> Matsumoto, Kengo; Toyonaka Municipal Hospital, Department of Gastroenterology<br/> Inada, Masami ; Toyonaka Municipal Hospital, Department of Gastroenterology</p> |
| <p>Keywords:</p> | <p>Radiation Exposure, Diagnostic Reference Levels, ERCP, Gastrointestinal Fluoroscopic Procedure, Endoscopy &lt; GASTROENTEROLOGY</p>                                                                                                                                                                                                                                                                                                                                                                                  |
|                  |                                                                                                                                                                                                                                                                                                                                                                                                                                                                                                                         |

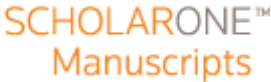

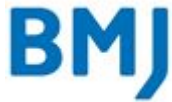

I, the Submitting Author has the right to grant and does grant on behalf of all authors of the Work (as defined in the below author licence), an exclusive licence and/or a non-exclusive licence for contributions from authors who are: i) UK Crown employees; ii) where BMJ has agreed a CC-BY licence shall apply, and/or iii) in accordance with the terms applicable for US Federal Government officers or employees acting as part of their official duties; on a worldwide, perpetual, irrevocable, royalty-free basis to BMJ Publishing Group Ltd ("BMJ") its licensees and where the relevant Journal is co-owned by BMJ to the co-owners of the Journal, to publish the Work in this journal and any other BMJ products and to exploit all rights, as set out in our [licence](#).

The Submitting Author accepts and understands that any supply made under these terms is made by BMJ to the Submitting Author unless you are acting as an employee on behalf of your employer or a postgraduate student of an affiliated institution which is paying any applicable article publishing charge ("APC") for Open Access articles. Where the Submitting Author wishes to make the Work available on an Open Access basis (and intends to pay the relevant APC), the terms of reuse of such Open Access shall be governed by a Creative Commons licence – details of these licences and which [Creative Commons](#) licence will apply to this Work are set out in our licence referred to above.

Other than as permitted in any relevant BMJ Author's Self Archiving Policies, I confirm this Work has not been accepted for publication elsewhere, is not being considered for publication elsewhere and does not duplicate material already published. I confirm all authors consent to publication of this Work and authorise the granting of this licence.

1  
2  
3  
4  
5  
6  
7  
8  
9  
10  
11  
12  
13  
14  
15  
16  
17  
18  
19  
20  
21  
22  
23  
24  
25  
26  
27  
28  
29  
30  
31  
32  
33  
34  
35  
36  
37  
38  
39  
40  
41  
42  
43  
44  
45  
46  
47  
48  
49  
50  
51  
52  
53  
54  
55  
56  
57  
58  
59  
60

1 **A Multicenter Prospective Observational Study Protocol for Radiation Exposure**  
2 **from Gastrointestinal Fluoroscopic Procedures (REX-GI study)**

3  
4 Tsutomu Nishida<sup>1</sup>, Shiro Hayashi<sup>1,2</sup>, Mamoru Takenaka<sup>3</sup>, Makoto Hosono<sup>4</sup>, Hirofumi  
5 Kogure<sup>5</sup>, Kenkei Hasatani<sup>6</sup>, Shinjiro Yamaguchi<sup>7</sup>, Hirotsugu Maruyama<sup>8</sup>, Hisashi  
6 Doyama<sup>9</sup>, Hideyuki Ihara<sup>10</sup>, Toshiyuki Yoshio<sup>11</sup>, Koji Nagaike<sup>12</sup>, Takuya Yamada<sup>13</sup>,  
7 Takayuki Yakushijin<sup>14</sup>, Tadayuki Takagi<sup>15</sup>, Hidetaka Tsumura<sup>16</sup>, Akira Kurita<sup>17</sup>,  
8 Satoshi Asai<sup>18</sup>, Yukiko Ito<sup>19</sup>, Toshio Kuwai<sup>20</sup>, Yasuki Hori<sup>21</sup>, Iruru Maetani<sup>22</sup>, Kenji  
9 Ikezawa<sup>23</sup>, Takuji Iwashita<sup>24</sup>, Kengo Matsumoto<sup>1</sup>, Masami Inada<sup>1</sup>

10  
11 1) Department of Gastroenterology, Toyonaka Municipal Hospital, Toyonaka, Osaka,  
12 Japan

13 2) Department of Gastroenterology and Internal Medicine, Kento Hayashi Clinic,  
14 Suita, Osaka, Japan

15 3) Department of Gastroenterology and Hepatology, Kindai University, Faculty of  
16 Medicine, Osaka-Sayama, Osaka, Japan

17 4) Department of Radiology, Kindai University Faculty of Medicine, Osaka-Sayama,  
18 Osaka, Japan

19 5) Department of Gastroenterology, Graduate School of Medicine, The University of  
20 Tokyo, Tokyo, Japan

21 6) Department of Gastroenterology, Fukui Prefectural Hospital, Fukui, Fukui, Japan

22 7) Department of Gastroenterology and Hepatology, Kansai Rosai Hospital,

- 1  
2  
3  
4  
5  
6 23 Amagasaki, Hyogo, Japan  
7  
8  
9 24 8) Department of Gastroenterology, Osaka City University, Graduate School of  
10  
11 25 Medicine, Osaka, Osaka, Japan  
12  
13 26 9) Department of Gastroenterology, Ishikawa Prefectural Central Hospital, Kanazawa,  
14  
15  
16 27 Ishikawa, Japan  
17  
18 28 10) Department of Gastroenterology, Tonan Hospital, Sapporo, Hokkaido, Japan  
19  
20  
21 29 11) Department of Gastroenterology, Cancer Institute Hospital, Japanese Foundation  
22  
23 30 for Cancer Research, Ariake, Tokyo, Japan  
24  
25  
26 31 12) Department of Gastroenterology and Hepatology, Suita Municipal Hospital, Osaka,  
27  
28 32 Japan  
29  
30  
31 33 13) Department of Gastroenterology and Hepatology, Osaka-Rosai Hospital,  
32  
33 34 Sakai, Osaka, Japan  
34  
35  
36 35 14) Department of Gastroenterology and Hepatology, Osaka General Medical Center,  
37  
38 36 Osaka, Osaka, Japan  
39  
40  
41 37 15) Department of Gastroenterology, Fukushima Medical University School of  
42  
43 38 Medicine, Fukushima, Japan  
44  
45  
46 39 16) Department of Gastroenterological Oncology, Hyogo Cancer Center, Akashi, Japan  
47  
48  
49 40 17) Department of Gastroenterology and Hepatology, Digestive Disease Center, Kitano  
50  
51 41 Hospital, Tazuke Kofukai Medical Research Institute, Osaka, Osaka, Japan  
52  
53  
54 42 18) Department of Gastroenterology, Tane General Hospital, Osaka, Osaka, Japan  
55  
56  
57 43 19) Department of Gastroenterology, Japanese Red Cross Medical Center, Tokyo,  
58  
59  
60

1  
2  
3  
4  
5  
6 44 Japan

7  
8 45 20) Department of Gastroenterology, National Hospital Organization, Kure Medical  
9  
10  
11 46 Center and Chugoku Cancer Center, Kure, Japan

12  
13 47 21) Department of Gastroenterology and Metabolism, Nagoya City University Graduate  
14  
15  
16 48 School of Medical Sciences, Nagoya, Japan

17  
18 49 22) Division of Gastroenterology and Hepatology, Department of Internal  
19  
20  
21 50 Medicine, Toho University Ohashi Medical Center, Tokyo, Japan

22  
23 51 23) Department of Hepatobiliary and Pancreatic Oncology, Osaka International Cancer  
24  
25  
26 52 Institute, Osaka, Osaka, Japan

27  
28 53 24) First Department of Internal Medicine, Gifu University Hospital, Gifu, Japan

29  
30  
31 54

32  
33 55 **Address all correspondence to:** Tsutomu Nishida, M.D.

34  
35  
36 56 Department of Gastroenterology, Toyonaka Municipal Hospital

37  
38  
39 57 4-14-1 Shibahara, Toyonaka, Osaka 560-8565 Japan

40  
41  
42 58 Email: [tnishida.gastro@gmail.com](mailto:tnishida.gastro@gmail.com)

43  
44  
45 59 Tel: +81-6-6843-0101

46  
47  
48  
49 60

50  
51 61 **Email address:** Tsutomu Nishida: [tnishida.gastro@gmail.com](mailto:tnishida.gastro@gmail.com), Shiro Hayashi:

52  
53 62 [hayashishiro1976@yahoo.co.jp](mailto:hayashishiro1976@yahoo.co.jp), Mamoru Takenaka: [mamoxyo45@gmail.com](mailto:mamoxyo45@gmail.com), Makoto

54  
55 63 Hosono: [hosono@med.kindai.ac.jp](mailto:hosono@med.kindai.ac.jp), Hirofumi Kogure: [kogureh-tyk@umin.ac.jp](mailto:kogureh-tyk@umin.ac.jp), Kenkei

56  
57 64 Hasatani: [hasatani9@yahoo.co.jp](mailto:hasatani9@yahoo.co.jp), Shinjiro Yamaguchi: [smay-0608@diary.ocn.ne.jp](mailto:smay-0608@diary.ocn.ne.jp),  
58  
59  
60

1  
2  
3  
4  
5  
6 65 Hirotsugu Maruyama: [hiromaruyama99@gmail.com](mailto:hiromaruyama99@gmail.com), Hisashi Doyama:  
7  
8 66 [doyama.134@gmail.com](mailto:doyama.134@gmail.com), Hideyuki Ihara: [h-ihara@tonan.gr.jp](mailto:h-ihara@tonan.gr.jp), Toshiyuki Yoshio:  
9  
10 67 [toshiyuki.yoshio@jfc.or.jp](mailto:toshiyuki.yoshio@jfc.or.jp), Koji Nagaike: [nagaike.koji@gmail.com](mailto:nagaike.koji@gmail.com), Takuya Yamada:  
11  
12 68 [yamtak1973@gmail.com](mailto:yamtak1973@gmail.com), Takayuki Yakushijin: [yakushijin@gh.opho.jp](mailto:yakushijin@gh.opho.jp), Tadayuki  
13  
14 69 Takagi: [daccho@fmu.ac.jp](mailto:daccho@fmu.ac.jp), Hidetaka Tsumura: [h.tsumura@hp.pref.hyogo.jp](mailto:h.tsumura@hp.pref.hyogo.jp), Akira  
15  
16 70 Kurita: [kuritaaki1976@gmail.com](mailto:kuritaaki1976@gmail.com), Satoshi Asai: [bonyaritetsu1226@hotmail.co.jp](mailto:bonyaritetsu1226@hotmail.co.jp),  
17  
18 71 Yukiko Ito: [yukikomd1224@gmail.com](mailto:yukikomd1224@gmail.com), Toshio Kuwai: [toshiokuwai@gmail.com](mailto:toshiokuwai@gmail.com),  
19  
20 72 Yasuki Hori: [yhori@med.nagoya-cu.ac.jp](mailto:yhori@med.nagoya-cu.ac.jp), Iruru Maetani: [u.ac.jp](mailto:mtnir50637@med.toho-<br/>21<br/>22 u.ac.jp), Kenji Ikezawa: [ikezawa-ke@mc.pref.osaka.jp](mailto:ikezawa-ke@mc.pref.osaka.jp), Takuji Iwashita:  
23  
24 73 [takuji@w7.dion.ne.jp](mailto:takuji@w7.dion.ne.jp), Kengo Matsumoto: [ken5@gh.med.osaka-u.ac.jp](mailto:ken5@gh.med.osaka-u.ac.jp), Masami Inada:  
25  
26 74  
27  
28  
29  
30  
31 75 [inada-intoyo@chp.toyonaka.osaka.jp](mailto:inada-intoyo@chp.toyonaka.osaka.jp)  
32  
33  
34  
35

36 77 **Word counts:** 2276 words  
37  
38  
39  
40

41 79 **Keywords:** Radiation Exposure, Diagnostic Reference Levels, ERCP, Gastrointestinal  
42  
43 80 Fluoroscopic Procedure, Endoscopy.  
44  
45  
46  
47  
48  
49  
50  
51  
52  
53  
54  
55  
56  
57  
58  
59  
60



1  
2  
3  
4  
5  
6 **82 ABSTRACT**

7  
8 **83 INTRODUCTION:** Recently, the use of various endoscopic procedures under X-ray  
9  
10 **84** fluoroscopic guidance, such as endoscopic retrograde cholangiopancreatography  
11  
12 **85** (ERCP), interventional endoscopic ultrasonography (EUS), enteral endoscopy, and  
13  
14 **86** stenting, has been rapidly increasing because of the minimally invasive nature of these  
15  
16 **87** procedures compared to that of surgical intervention. With the spread of computed  
17  
18 **88** tomography and fluoroscopic interventions, including endoscopic procedures under X-  
19  
20 **89** ray guidance, high levels of radiation exposure (RE) from medical imaging have led to  
21  
22 **90** major concerns throughout society. However, information about RE related to these  
23  
24 **91** image-guided procedures is scarce, and their reference levels have not been  
25  
26 **92** established. The aim of this study is prospectively to collect the actual RE dose and to  
27  
28 **93** help establish diagnostic reference levels (DRLs) in the field of gastroenterology in  
29  
30 **94** Japan.

31  
32 **95 METHODS AND ANALYSIS:** This study is a multicenter, prospective observational  
33  
34 **96** study that aims to collect the actual RE from treatments and diagnostic procedures,  
35  
36 **97** including ERCP, interventional EUS, balloon-assisted enteroscopy, and enteral metallic  
37  
38 **98** stent and enteral tube placement. We will measure the total fluoroscopy time (FT, min),  
39  
40 **99** the total dose-area product (DAP, Gy $\text{cm}^2$ ) and air-kerma (AK, mGy) of those  
41  
42 **100** procedures. Because we will be collecting the actual RE data and identifying the  
43  
44 **101** affecting factors through a prospective, nationwide design, this study will help to set the  
45  
46 **102** DRLs of ERCP, interventional EUS, balloon-assisted enteroscopy, and enteral metallic  
47  
48 **103** stent and enteral tube placement.  
49  
50  
51  
52  
53  
54  
55  
56  
57  
58  
59  
60

1  
2  
3  
4  
5  
6 104 **ETHICS AND DISSEMINATION:** This trial (Radiation EXposure from GastroIntestinal  
7  
8  
9 105 fluoroscopic procedures: REX-GI study) was registered with the UMIN Clinical Trials  
10  
11 106 Registry at <http://www.umin.ac.jp/ctr/> with number UMIN000036525 (registered 1 May  
12  
13  
14 107 2019). Approval was obtained from each institutional review board. The requirement for  
15  
16 108 informed consent will be waived via the *opt-out* method of each hospital website.  
17  
18  
19 109

1  
2  
3  
4  
5  
6 110 **Article summary**  
7

8 111 This is a research protocol of a study that aims to collect actual data on radiation  
9  
10 112 exposure (RE) and to identify the factors affecting RE during treatments and diagnostic  
11  
12 113 procedures under different types of fluoroscopic guidance for gastroenterology  
13  
14 114 procedures, including the gastrointestinal, hepatobiliary and pancreatic fields, to serve  
15  
16 115 as a basis for DRLs in Japan.  
17  
18  
19

20  
21 116  
22

23 117 **Strengths and limitations of this study**  
24

- 25  
26 118 • A large, multicenter, nationwide dataset of radiation exposure doses for  
27  
28 119 gastrointestinal fluoroscopic procedures, including endoscopic retrograde  
29  
30 120 cholangiopancreatography, interventional endoscopic ultrasonography, balloon-  
31  
32 121 assisted enteroscopy, and enteral metallic stent and enteral tube placement, serves  
33  
34 122 as a basis for the diagnostic reference levels in Japan.  
35  
36 123 • This study will include data from relatively recently launched fluoroscopic systems.  
37  
38 124 Therefore, these data may not always be valid for old models of fluoroscopic  
39  
40 125 systems.  
41  
42 126 • This study will be conducted in hospitals where gastroenterologists or endoscopists  
43  
44 127 who are concerned about medical radiation exposure work. Therefore, the collected  
45  
46 128 values of radiation exposure may be lower than those in the real world.  
47  
48  
49  
50  
51  
52

53 129  
54  
55  
56  
57  
58  
59  
60

## 130 INTRODUCTION

131 Medical radiation is widely used in both medical imaging and radiation treatment. In  
132 medical imaging, fluoroscopy employs radiation to show a continuous X-ray image on a  
133 monitor and plays a major role in the daily practices of gastroenterology, digestive  
134 endoscopy, and hepatobiliary and pancreatic studies. Radiological medical imaging  
135 has both benefits and drawbacks for patients. The latter is split into two types:  
136 deterministic risks <sup>1</sup>, determined by the threshold dose, as represented by skin injury;  
137 and stochastic risks, determined by a linear no-threshold model, such as cancer risk <sup>2</sup>.  
138 Therefore, all medical staff involved in medical radiation are required to have correct  
139 knowledge of the appropriate use of medical radiation. Historically, medical radiation  
140 has rapidly increased since the 1990s with the spread of computed tomography (CT),  
141 and radiation-associated cancer risk was recognized in the same period, even with  
142 small doses <sup>3 4 5</sup>. In particular, the use of CT has increased approximately 12-fold in the  
143 United Kingdom and more than 20-fold in the United States in the last 25 years <sup>6</sup>.  
144 The International Atomic Energy Agency (IAEA), the International Commission on  
145 Radiological Protection (ICRP), the United Nations Scientific Committee on the Effects  
146 of Atomic Radiation (UNSCEAR), and other radiological societies have been trying to  
147 manage medical RE according to the “as low as reasonably achievable” (ALARA)  
148 principle by establishing diagnostic reference levels (DRLs) to optimize protection from  
149 medical radiation. The concept of DRLs was first introduced by ICRP 73 <sup>7</sup> in 1996.  
150 Then, the ICRP emphasized the important role of DRLs as a tool for optimizing patient  
151 protection <sup>8 9</sup>. Accordingly, the ICRP set specific target levels for various X-ray-related

1  
2  
3  
4  
5  
6 152 procedures in 2007<sup>8</sup>. This movement of setting DRLs has been led by radiation-related  
7  
8 153 societies in each region, although mainly in Western countries. The ICRP 135  
9  
10  
11 154 recommends that all individuals who are involved in patient procedures with the risk of  
12  
13  
14 155 medical exposure should be familiar with the DRL process as a tool for optimizing  
15  
16 156 protection<sup>10</sup>. DRLs are now widely accepted in not only Western countries but also  
17  
18 157 Japan (Japan DRLs 2015)<sup>11</sup>, and DRLs have been the global standard for all  
19  
20  
21 158 procedures that use ionizing radiation. The introduction of DRLs in the UK could  
22  
23  
24 159 achieve a reduction in radiation dose of approximately 50% in typical X-ray  
25  
26 160 examinations over 15 years<sup>12</sup>. However, there is still not enough available data on RE  
27  
28  
29 161 for gastrointestinal fluoroscopic procedures, such as endoscopic retrograde  
30  
31 162 cholangiopancreatography (ERCP), interventional endoscopic ultrasonography (EUS),  
32  
33  
34 163 small bowel endoscopy, and enteral stent placement; these techniques are still being  
35  
36 164 developed and have recently been used with increasing frequency<sup>13</sup>.  
37  
38  
39 165 Our gastroenterologists and endoscopists are still unfamiliar with the DRL concept.  
40  
41 166 Among gastrointestinal endoscopy associations, the 2012 European Gastrointestinal  
42  
43  
44 167 Endoscopy Society (ESGE) guidelines for radiation protection states that the entrance  
45  
46 168 skin dose (ESD; approximately equivalent to air-kerma in this study) and kerma-area  
47  
48  
49 169 product (KAP; approximately equivalent to dose-area product (DAP) in this study)  
50  
51 170 during ERCP are 55-347 mGy and 3-115/8-333 Gy $\text{cm}^2$ , respectively, although  
52  
53  
54 171 information regarding DRLs of ERCP is limited because this statement is based on  
55  
56 172 approximately only 600 cases of ERCP, including 7 reports<sup>14</sup>. No guidelines on RE  
57  
58  
59 173 from the American Society for Gastrointestinal Endoscopy (ASGE) exist, but the ASGE  
60

1  
2  
3  
4  
5  
6 174 recommends measuring and documenting fluoroscopy time (FT) and radiation dose in  
7  
8 175 all ERCP procedures as a quality indicator (level of evidence: 2C) <sup>15</sup>. Although no  
9  
10  
11 176 guidelines for exposure have been developed at the Japan Gastroenterological  
12  
13 177 Endoscopy Society (JGES), a description of FT exists in the item about ERCP in the  
14  
15  
16 178 Japan Endoscopy Database (JED) <sup>16</sup>, which is scheduled to be implemented as a  
17  
18 179 nationwide endoscopic survey in 2020. Therefore, we aim to collect the actual RE data  
19  
20  
21 180 and identify the affecting factors in the REX-GI study and to establish data based on  
22  
23 181 the DRLs of ERCP, interventional EUS, balloon-assisted enteroscopy, and enteral  
24  
25  
26 182 metallic stent and enteral tube placement.  
27  
28  
29  
30  
31  
32  
33  
34  
35  
36  
37  
38  
39  
40  
41  
42  
43  
44  
45  
46  
47  
48  
49  
50  
51  
52  
53  
54  
55  
56  
57  
58  
59  
60

1  
2  
3  
4  
5  
6 183 **METHODS AND ANALYSIS**  
7

8  
9 184 **Aims**

10  
11 185 The primary aim of this nationwide, prospective study is to collect actual data on RE  
12  
13 186 and identify the factors affecting RE during treatments and diagnostic procedures  
14  
15  
16 187 under different types of fluoroscopic guidance for gastroenterology procedures,  
17  
18 188 including the gastrointestinal, hepatobiliary and pancreatic fields, to serve as a basis  
19  
20  
21 189 for DRLs in Japan.  
22

23  
24 190

25  
26 191 **Design**

27  
28 192 This is a multicenter, prospective observational cohort study of consecutive patients  
29  
30  
31 193 who underwent the following 5 treatments and diagnostic procedures under  
32  
33 194 fluoroscopic guidance in the field of gastroenterology: 1) ERCP, 2) interventional EUS,  
34  
35  
36 195 3) balloon-assisted enteroscopy, 4) enteral metallic stent placement; and 5) enteral  
37  
38 196 tube placement. We examined the procedure time (min), total FT (min), AK (mGy),  
39  
40  
41 197 DAP (Gycm<sup>2</sup>), total number of roentgenography, and radiation dose rate (RDR)  
42  
43 198 (mGy/min) during the procedures. The participating clinicians will manage patients  
44  
45  
46 199 according to usual clinical practice, and the patients will undergo the above 5  
47  
48 200 procedures. For analysis, all data, including the related variables and outcome data  
49  
50  
51 201 (Tables 1 and 2), will be collected for all patients. The study (Radiation EXposure from  
52  
53 202 GastroIntestinal fluoroscopic procedures: REX-GI study) was registered with the UMIN  
54  
55  
56 203 Clinical Trials Registry at <http://www.umin.ac.jp/ctr/> with number UMIN000036525  
57  
58 204 (registered 1 May 2019).  
59  
60

1  
2  
3  
4  
5  
6 205  
7

8  
9 **206 Setting**

10  
11 207 The study was conducted at 7 university hospitals, 4 cancer centers, 9 general  
12  
13 208 hospitals and 2 municipal hospitals in Japan. The participating hospitals are Toyonaka  
14  
15 209 Municipal Hospital, Kindai University, the University of Tokyo, Fukui Prefectural  
16  
17 210 Hospital, Kansai Rosai Hospital, Osaka City University, Ishikawa Prefectural Central  
18  
19 211 Hospital, Tonan Hospital, Japanese Foundation for Cancer Research, Suita Municipal  
20  
21 212 Hospital, Osaka Rosai Hospital, Osaka General Medical Center, Fukushima Medical  
22  
23 213 University School of Medicine, Hyogo Cancer Center, Kitano Hospital, Tane General  
24  
25 214 Hospital, Japanese Red Cross Medical Center, Kure Medical Center and Chugoku  
26  
27 215 Cancer Center, Nagoya City University Hospital, Toho University Ohashi Medical  
28  
29 216 Center, Osaka International Cancer Institute, and Gifu University Hospital (Figure 1).  
30  
31 217 The central sites of the study are located at the Toyonaka Municipal Hospital and  
32  
33 218 Kindai University.  
34  
35

36  
37  
38  
39  
40  
41 219

42  
43 **220 Study population**

44  
45  
46 221 We will include all patients following usual clinical care who underwent the following  
47  
48 222 treatments and diagnostic procedures under fluoroscopic guidance: 1) ERCP; 2)  
49  
50 223 interventional EUS; 3) balloon-assisted enteroscopy; 4) enteral metallic stent  
51  
52 224 placement; and 5) enteral tube placement. There is no age restriction. We will exclude  
53  
54 225 patients who do not want to participate in this study via the *opt-out* method of each  
55  
56  
57  
58  
59  
60



226 hospital website and patients who the attending physicians judge inadequate for this

227 study.

228

### 229 **Primary outcomes**

230 The primary outcomes will be the total FT (min), RDR (mGy/min), dose-area

231 parameters (AK (mGy) and DAP (Gycm<sup>2</sup>)) and total number of imaging studies that the

232 patients who meet the individual inclusion and exclusion criteria will undergo (Table 1).

233

### 234 **Secondary outcomes**

235 The secondary outcome will be the RE-related factors that affect the radiation dose in

236 each procedure. The details are shown in Table 2.

237

### 238 **Setting the sample size**

239 According to the preliminary questionnaire survey (data not shown), the numbers of

240 examinations per year in the 8 centers that plan to participate in March 2019 are 4000

241 ERCP procedures, 125 EUS procedures, 320 small intestine endoscopy procedures,

242 44 esophageal stent placements, 150 gastroduodenal stent placements, 75 colorectal

243 stent placements, 180 transanal ileus tube placements, and 75 ileus tube placements.

244 To set the DRL and to reduce intraprocedural variability in each hospital, we believe

245 that initially enrolling a high number of facilities and patients is desirable; therefore, we

246 did not set an upper limit for the goals.

247

1  
2  
3  
4  
5  
6 **248 Data analysis plan**

7  
8  
9 **249** Continuous variables will be expressed as medians with interquartile ranges. The  
10  
11 **250** categorical variables will be expressed as numbers in each category or as frequencies.  
12  
13  
14 **251** Simple linear regression analysis will be performed to identify the relationships  
15  
16 **252** between procedure time, FT and RD. A multiple linear regression analysis will be  
17  
18 **253** performed to identify the factors related to RD. A P value of 0.05 will be considered  
19  
20  
21 **254** statistically significant. All statistical analyses will be performed with JMP software  
22  
23  
24 **255** (SAS Institute, Inc., Cary, NC, USA).

25  
26 **256**

27  
28  
29 **257 Patient and public involvement and patient recruitment**

30  
31 **258** Clinical factors related to ERCP and interventional EUS have been retrospectively  
32  
33 **259** collected at two sites (Toyonaka Municipal Hospital and Kindai University)<sup>17-20</sup>. We  
34  
35  
36 **260** used those published data to develop plans for the design or implementation of the  
37  
38 **261** study and to determine the research question or the outcome measures. No patients  
39  
40  
41 **262** were requested to advise us on the interpretation or writing up of results. There are no  
42  
43  
44 **263** plans to disseminate the results of the research to study participants, but we will  
45  
46 **264** consider disseminating the results of the research to the relevant patient community.

47  
48  
49 **265**

50  
51 **266 Data collection**

52  
53 **267** The clinical factors have been modified to comply with local patient flow and  
54  
55  
56 **268** administrative requirements and have been assessed and approved by the study  
57  
58  
59 **269** steering committee. Case report forms will be de-identified after all data points have  
60

1  
2  
3  
4  
5  
6 270 been completed and all data queries have been addressed. Data collection will be  
7  
8 271 scheduled to be performed at 3-month intervals to prevent data loss. Data analysis will  
9  
10 272 take place at the central study site (Kindai University). This study does not require data  
11  
12 273 monitoring due to its nature as an observational study without interventions. Data will  
13  
14 274 be retained for either a minimum of 5 years after the end of the study or for 10 years  
15  
16 275 after publication, whichever is later.  
17  
18  
19  
20  
21

22 276

### 23 24 277 **Time plan**

25  
26 278 May 2019 - December 2020: Patient recruitment.

27  
28 279 2021: Data analysis and writing and submission of the main manuscript for publication.  
29  
30  
31

32 280

### 33 34 281 **Ethics and dissemination**

35  
36 282 This observational study will be conducted in accordance with the Declaration of  
37  
38 283 Helsinki, and approval has been obtained from each institutional review board. The  
39  
40 284 requirement for informed consent will be waived via the *opt-out* method of each  
41  
42 285 hospital website.  
43  
44  
45  
46  
47  
48

49 286

### 50 287 **Author contributions**

51  
52 288 Nishida T, Hayashi S (Toyonaka Municipal Hospital), and Takenaka M (Kindai  
53  
54 289 University) designed this study. Hosono M (Kindai University) critically reviewed the  
55  
56 290 protocol. Nishida T, Hayashi S (Toyonaka Municipal Hospital), Takenaka M (Kindai  
57  
58  
59  
60

1  
2  
3  
4  
5  
6 291 University), Kogure H (The University of Tokyo), Hasatani K (Fukui Prefectural  
7  
8 292 Hospital), Yamaguchi S (Kansai Rosai Hospital), Maruyama H (Osaka City University),  
9  
10  
11 293 Doyama H (Ishikawa Prefectural Central Hospita), Ihara H, (Tonan Hospital) Yoshio T  
12  
13 294 (Cancer Institute Hospital, Japanese Foundation for Cancer Research), Nagaike K  
14  
15 295 (Suita Municipal Hospital), Yamada T (Osaka-Rosai Hospital), Yakushijin T (Osaka  
16  
17 296 General Medical Center), Takagi T (Fukushima Medical University School of Medicine),  
18  
19 297 Tsumura H (Hyogo Cancer Center), Kurita A ( Kitano Hospital), Asai S (Tane General  
20  
21 298 Hospital), Ito Y (Japanese Red Cross Medical Center), Kuwai T (National Hospital  
22  
23 299 Organization, Kure Medical Center and Chugoku Cancer Center), Hori Y (Nagoya City  
24  
25 300 University Graduate School of Medical Sciences), Maetani I (Toho University Ohashi  
26  
27 301 Medical Center), Ikezawa K (Osaka International Cancer Institute), Iwashita T (Gifu  
28  
29 302 University Hospital), Matsumoto K, and Inada M (Toyonaka Municipal Hospital)  
30  
31 303 participated this study and will recruit the patients. All authors accepted the final  
32  
33 304 version of the protocol (ver. 1.1: 2019-Mar-14, ver.1.5: 2019-July-15).  
34  
35  
36  
37  
38  
39  
40  
41  
42  
43  
44

### 305 306 **Acknowledgements and collaborators**

307 We thank all the collaborators who cooperated in this first nationwide study of the  
308 Radiation Exposure from Gastrointestinal Fluoroscopic Procedures in Japan (REX-GI).  
309 The collaborators of the REX-GI study are Mitsuhiro Fujishiro (Nagoya University  
310 Graduate School of Medicine), Masashi Yamamoto, Dai Nakamatsu, Kaori Mukai, Kei  
311 Takahashi, Aya Sugimoto, Naoto Osugi, Yu Higaki, Ryo Tomita, Tatsuya Sakamoto,

1  
2  
3  
4  
5  
6 312 Emi Meren, Kazuki Aochi, Shinji Kuriki, Li-sa Chang, and Koji Fukui (Toyonaka  
7  
8  
9 313 Municipal Hospital), Yousuke Nakai (The University of Tokyo), Takahiro Suda  
10  
11 314 (Kansai Rosai Hospital), Kazuhiro Matsunaga (Ishikawa Prefectural Central  
12  
13  
14 315 Hospital), Tetsuya Sumiyoshi (Tonan Hospital), Takashi Sasaki, Atsuko Tamashiro,  
15  
16 316 Hiroyuki Hatamori (Cancer Institute Hospital, Japanese Foundation for Cancer  
17  
18 317 Research), Takumi Kanagawa, Yuichi Yoshida, Masafumi Naito (Suita Municipal  
19  
20  
21 318 Hospital), Shuji Ishii (Osaka General Medical Center), Takuto Hikichi (Fukushima  
22  
23  
24 319 Medical University School of Medicine), Naoki Fujimoto (Tane General Hospital), Ikuya  
25  
26 320 Miki (Hyogo Cancer Center), Yuzuru Tamaru (National Hospital Organization Kure  
27  
28 321 Medical Center and Chugoku Cancer Center), Hiromi Kataoka, Kazuki Hayashi  
29  
30  
31 322 (Nagoya City University Graduate School of Medical Sciences), Hiroaki Shigoka (Toho  
32  
33  
34 323 University Ohashi Medical Center).

35  
36 324

### 37 38 325 **Funding statement**

39  
40 326 This research received no specific grants from any funding agency in the public,  
41  
42  
43 327 commercial or not-for-profit sectors.  
44  
45

46  
47 328

### 48 49 329 **Publication and data sharing**

50  
51  
52  
53 330 After completion of the study, a main manuscript will be prepared to present the results  
54  
55 331 and will be submitted to a clinical journal for peer review. This study will ensure that the  
56  
57  
58 332 public has access to the published data. A file containing the clean dataset used for  
59  
60

1  
2  
3  
4  
5  
6 333 final analysis to determine the main data of the study, and an explanation of variables

7  
8 334 will be made publicly accessible in an anonymized format.

9  
10  
11 335

12  
13 336 **Consent for publication**

14  
15  
16 337 The principal investigators will form a publication committee, which will include key

17  
18 338 members of this study, and the committee will grant authorship according to individual

19  
20 339 input. Investigators who do not qualify for authorship will be acknowledged by name in

21  
22 340 the final manuscript.

23  
24  
25  
26  
27 341

28  
29  
30  
31 342 **Conflicts of interest statement.**

32  
33  
34  
35 343 None of the authors have any competing interests arising from this research.

1  
2  
3  
4  
5  
6 **345 Discussion**  
7

8  
9 **346** Currently, the establishment of DRLs is an international requirement for protection from  
10  
11 **347** medical radiation. Generally, for diagnostic radiology, national and regional DRLs are  
12  
13 **348** usually set at the 75% percentile of the distribution of a typical sample dose <sup>21</sup>. All  
14  
15  
16 **349** physicians or medical staff who are involved in radiological imaging or procedures  
17  
18 **350** under fluoroscopic guidance should be familiar with the DRL process as a tool for  
19  
20  
21 **351** optimizing protection. In addition, separate DRLs must be established for each country  
22  
23  
24 **352** and/or region because the equipment and procedure protocols can vary among  
25  
26 **353** different regions <sup>21</sup>. However, the amount of RE depends on procedure complexity,  
27  
28 **354** patient anatomy, lesion characteristics, disease severity <sup>10</sup> and type of fluoroscopic  
29  
30  
31 **355** devices <sup>18</sup>; thus, setting the upper limit of radiation use by applying uniform standards is  
32  
33  
34 **356** difficult. Generally, DRLs are not dose limits and do not help distinguish between good  
35  
36 **357** and poor medical practices <sup>21</sup>. Therefore, a high demand exists for a large amount of  
37  
38  
39 **358** real-world evidence. The 2015 Japan DRLs state that the methods for establishing  
40  
41 **359** DRLs not only includes setting radiation dose levels but also includes determining the  
42  
43  
44 **360** dose quantities and units used to set the DRLs, thus standardizing the methodology for  
45  
46 **361** dose measurements, data collection and identification of the applications of DRLs <sup>11</sup>.  
47  
48  
49 **362** Unfortunately, most gastroenterologists are unfamiliar with not only DRLs but also  
50  
51 **363** radiation protection because information on RE from gastrointestinal medical treatment  
52  
53  
54 **364** is currently very scarce, and few RE standards, including DRLs, have been established  
55  
56 **365** worldwide. Given this background, the REX-GI study is planned as an observational,  
57  
58  
59 **366** nationwide study in Japan. Our results will help to promote radiation optimization and  
60

1  
2  
3  
4  
5  
6 367 patient radiation protection in gastroenterology studies, such as digestive endoscopy,  
7  
8  
9 368 and hepatobiliary and pancreatic procedures.  
10  
11  
12  
13  
14  
15  
16  
17  
18  
19  
20  
21  
22  
23  
24  
25  
26  
27  
28  
29  
30  
31  
32  
33  
34  
35  
36  
37  
38  
39  
40  
41  
42  
43  
44  
45  
46  
47  
48  
49  
50  
51  
52  
53  
54  
55  
56  
57  
58  
59  
60

For peer review only



Table 1. Primary outcomes

| Factors             | Variables                                                                                                                                                                                                                                                                        |
|---------------------|----------------------------------------------------------------------------------------------------------------------------------------------------------------------------------------------------------------------------------------------------------------------------------|
| Patients            | <ul style="list-style-type: none"> <li>▪ Procedure type</li> <li>▪ Age</li> <li>▪ Sex</li> </ul>                                                                                                                                                                                 |
| Fluoroscopic system | <ul style="list-style-type: none"> <li>▪ Fluoroscopic device (company, device model, manufacturing year)</li> <li>▪ Basic use setting: frame per second (FPS), radiation field (cm<sup>2</sup>)</li> </ul>                                                                       |
| Radiation exposure  | <ul style="list-style-type: none"> <li>▪ Total fluoroscopy time (FT) (min)</li> <li>▪ Air-Kerma (AK) (mGy)</li> <li>▪ Dose-area product (DAP) (Gycm<sup>2</sup>)</li> <li>▪ Total number of roentgenography procedures</li> <li>▪ Radiation dose rate (RDR) (mGy/min)</li> </ul> |

1  
2  
3  
4  
5  
6  
7  
8  
9  
10  
11  
12  
13  
14  
15  
16  
17  
18  
19  
20  
21  
22  
23  
24  
25  
26  
27  
28  
29  
30  
31  
32  
33  
34  
35  
36  
37  
38  
39  
40  
41  
42  
43  
44  
45  
46

Table 2. Secondary outcomes

| Procedures | Radiation exposure-related factors                                                                                                                                                                                                                                                                                                                                                                                                                                                                                                                                                                                                                                                                                                                                                                                                                                                                                                                                                                                                                                                                                                                                                                                                                        |
|------------|-----------------------------------------------------------------------------------------------------------------------------------------------------------------------------------------------------------------------------------------------------------------------------------------------------------------------------------------------------------------------------------------------------------------------------------------------------------------------------------------------------------------------------------------------------------------------------------------------------------------------------------------------------------------------------------------------------------------------------------------------------------------------------------------------------------------------------------------------------------------------------------------------------------------------------------------------------------------------------------------------------------------------------------------------------------------------------------------------------------------------------------------------------------------------------------------------------------------------------------------------------------|
| ERCP       | <p>(A) Surgically altered gastrointestinal anatomy<br/>           Billroth I reconstruction, Billroth II reconstruction, Roux-en-Y reconstruction, pancreaticoduodenectomy</p> <p>(B) Type of endoscope</p> <p>(C) Naïve papilla</p> <p>(D) Indications for ERCP (including suspicion) are classified into the following five categories:</p> <ol style="list-style-type: none"> <li>1) Choledocholithiasis (maximum diameter, number of stones, presence of cholangitis, tube exchange for the above diseases, treatment for choledocholithiasis with or without balloon catheter, basket catheter, crusher, etc.)</li> <li>2) Distant malignant bile duct stricture (papillary tumor, distal cholangiocarcinoma, pancreatic cancer, etc.)</li> <li>3) Proximal malignant bile duct stricture (Hilar cholangiocarcinoma, intrahepatic cholangiocarcinoma, gallbladder cancer, etc.)</li> <li>4) Pancreatic duct examination (pancreas cancer, intraductal papillary mucinous neoplasm, etc.)</li> <li>5) Other diseases apart from those listed above (benign bile duct stricture, pancreatobiliary junction abnormality, etc.)</li> </ol> <p>(E) Total procedure time (min) *</p> <ol style="list-style-type: none"> <li>1) Cannulation time</li> </ol> |

|                    |                                                                                                                                                                                                                                                                                                                                                                                                                                                                                                                                                                                                                                                             |
|--------------------|-------------------------------------------------------------------------------------------------------------------------------------------------------------------------------------------------------------------------------------------------------------------------------------------------------------------------------------------------------------------------------------------------------------------------------------------------------------------------------------------------------------------------------------------------------------------------------------------------------------------------------------------------------------|
|                    | <p>2) Treatment time</p> <p>(F) Experience of the high-volume endoscopist (HVE) or low-volume endoscopist: (LVE) †</p> <p>(G) Facility scale: The number of ERCP procedures per year</p> <p>(H) Whether the fluoroscopic operator is inside or outside in the fluoroscopy room</p> <p>(I) Various treatments (endoscopic sphincterotomy, stone treatment, bile duct/pancreatic stent, cytology, biopsy, naïve papilla, cannulation method, contrast agent, intubation time, first-use catheter, large balloon, crusher, drainage area or method, stent type used, cholangioscopy)</p> <p>(J) Sedation: Medication and the depth of the anesthesia ‡</p>     |
| Interventional EUS | <p>(A) Indication for interventional EUS (EUS-guided hepaticogastrostomy (HGS)), choledochoduodenostomy (CDS), cyst drainage (CD), antegrade treatment (AG), rendezvous technique (RV), pancreatic duct drainage (PD)</p> <p>(B) Total procedure time‡</p> <p>    1) Endoscope insertion time</p> <p>    2) Treatment time</p> <p>(C) Facility scale: The number of EUS interventions per year, the number of EUS-guided fine-needle aspiration (FNA) procedures per year</p> <p>(D) Double stenting (presence or absence of duodenal stenosis)</p> <p>(E) Device</p> <p>(F) Scope position</p> <p>(G) Sedation: Medication and the depth of anesthesia</p> |
| Balloon-assisted   | <p>(A) Disease indicating balloon-assisted enteroscopy</p>                                                                                                                                                                                                                                                                                                                                                                                                                                                                                                                                                                                                  |

1  
2  
3  
4  
5  
6  
7  
8  
9  
10  
11  
12  
13  
14  
15  
16  
17  
18  
19  
20  
21  
22  
23  
24  
25  
26  
27  
28  
29  
30  
31  
32  
33  
34  
35  
36  
37  
38  
39  
40  
41  
42  
43  
44  
45  
46

|                                  |                                                                                                                                                                                                                                                                                                                                                                                                                  |
|----------------------------------|------------------------------------------------------------------------------------------------------------------------------------------------------------------------------------------------------------------------------------------------------------------------------------------------------------------------------------------------------------------------------------------------------------------|
| enteroscopy                      | <ol style="list-style-type: none"> <li>1) Hemostatic or bleeding confirmation</li> <li>2) Crohn's disease</li> <li>3) Small intestine tumor examination</li> <li>4) Others</li> </ol> <p>(B) Insertion site: perioral or transanal</p> <p>(C) Insertion length (cm)</p> <p>(D) Total procedure time (min)</p>                                                                                                    |
| Enteral metallic stent placement | <p>(A) Stent location</p> <ol style="list-style-type: none"> <li>1) Esophagus (Upper/Mid-Low/Trans)</li> <li>2) Gastro-duodenum (Above pylorus/Trans pylorus /Below pylorus)</li> <li>3) Colon stent (Right/Left/Rectum)</li> </ol> <p>(B) Total procedure time (min) §</p> <ol style="list-style-type: none"> <li>1) Endoscope insertion time</li> <li>2) Treatment time</li> </ol>                             |
| Enteral ileus tube placement     | <p>(A) Disease indicating ileus tube</p> <p>(B) Intranasal ileus tube insertion for ileal obstruction or transanal ileus tube insertion for malignant colonic obstruction</p> <ol style="list-style-type: none"> <li>1) Tube insertion length for peroral ileus tube placement (cm)</li> <li>2) The occlusion site for the transanal tube (Right/Left/Rectum)</li> </ol> <p>(D) Total procedure time (min) §</p> |

ERCP: endoscopic retrograde cholangiopancreatography

1  
2  
3  
4  
5 \* Cannulation time is defined as the time from endoscope insertion until successful biliary cannulation, and treatment time was defined  
6 as the time from successful biliary cannulation until the scope was removed from the patient. The total procedure time was defined as  
7 the time from endoscope insertion until the scope was removed from the patient (cannulation time +treatment time).  
8

9 ‡ Depth of anesthesia is divided into 3 levels based on the Richmond Agitation-Sedation Scale (RASS), Ramsay Scale, and Sedation-  
10 Agitation Scale (SAS): good, poor, and very bad. The good level is defined as RASS score: -5 ~ -1, SAS score: 1 ~ 3, and Ramsay  
11 score: 3 ~ 6 equivalent, without additional unplanned doses. The poor level is defined as RASS score: 0 ~ + 1, SAS score: 4 ~ 5, and  
12 Ramsay score: 1 ~ 2, without physical restraint but with unplanned doses. The very bad level is defined as requiring physical restraint  
13 with a manpower considered dangerous, RASS score: +2 to +4, and SAS score: 6 to 7 regardless of Ramsay score.  
14  
15

16 † HVE: Endoscopists with more than 200 ERCP results and who have been involved in ERCP for over 10 years. LVE: Non-HVE  
17 endoscopists who perform ERCP.  
18

19 ‡ Endoscope insertion time is defined as the time from endoscope insertion until the initial EUS-guided needle puncture, and treatment  
20 time was defined as the time from initial EUS-guided needle puncture until the scope was removed from the patient. The total  
21 procedure time was defined as the time from endoscope insertion until the scope was removed from the patient (endoscope insertion  
22 time +treatment time).  
23  
24

25 ‡ Endoscope insertion time is defined as the time from endoscope insertion until initial guidewire exploration, and treatment time was  
26 defined as the time from initial guidewire exploration until the scope was removed from the patient. The total procedure time was  
27 defined as the time from endoscope insertion until the scope was removed from the patient (endoscope insertion time +treatment  
28 time).  
29  
30  
31  
32  
33  
34  
35  
36  
37  
38  
39  
40  
41  
42  
43  
44  
45  
46

1  
2  
3  
4  
5  
6 **Figure legends**  
7

8 **Figure 1.** The participating hospitals in this study.  
9  
10  
11  
12  
13  
14  
15  
16  
17  
18  
19  
20  
21  
22  
23  
24  
25  
26  
27  
28  
29  
30  
31  
32  
33  
34  
35  
36  
37  
38  
39  
40  
41  
42  
43  
44  
45  
46  
47  
48  
49  
50  
51  
52  
53  
54  
55  
56  
57  
58  
59  
60

For peer review only

## References

1. Henry MF, Maender JL, Shen Y, et al. Fluoroscopy-induced chronic radiation dermatitis: a report of three cases. *Dermatol Online J* 2009;15(1):3. [published Online First: 2009/03/14]
2. NCRP Commentary No. 27: Implications of Recent Epidemiologic Studies for the Linear-Nonthreshold Model and Radiation Protection 2018 [Available from: [https://ncrponline.org/wp-content/themes/ncrp/Pub\\_announcements/Commentary\\_No27\\_overview.pdf](https://ncrponline.org/wp-content/themes/ncrp/Pub_announcements/Commentary_No27_overview.pdf) accessed July 9th, 2019.
3. de González AB, Darby S. Risk of cancer from diagnostic X-rays: estimates for the UK and 14 other countries. *The Lancet* 2004;363(9406):345-51. doi: 10.1016/s0140-6736(04)15433-0
4. Jaffe D, Bowden GT. Ionizing radiation as an initiator: effects of proliferation and promotion time on tumor incidence in mice. *Cancer Res* 1987;47(24 Pt 1):6692-6.
5. Mathews JD, Forsythe AV, Brady Z, et al. Cancer risk in 680,000 people exposed to computed tomography scans in childhood or adolescence: data linkage study of 11 million Australians. *BMJ* 2013;346:f2360. doi: 10.1136/bmj.f2360
6. Khoramian D, Sistani S, Hejazi P. Establishment of diagnostic reference levels arising from common CT examinations in Semnan County, Iran. *Polish Journal of Medical Physics and Engineering* 2019;25(1):51-55. doi: 10.2478/pjmpe-2019-0008

- 1  
2  
3  
4  
5  
6  
7  
8  
9  
10  
11  
12  
13  
14  
15  
16  
17  
18  
19  
20  
21  
22  
23  
24  
25  
26  
27  
28  
29  
30  
31  
32  
33  
34  
35  
36  
37  
38  
39  
40  
41  
42  
43  
44  
45  
46  
47  
48  
49  
50  
51  
52  
53  
54  
55  
56  
57  
58  
59  
60
7. Radiological protection and safety in medicine. A report of the International Commission on Radiological Protection. *Ann ICRP* 1996;26(2):1-47. [published Online First: 1996/01/01]
8. The 2007 Recommendations of the International Commission on Radiological Protection. ICRP publication 103. *Ann ICRP* 2007;37(2-4):1-332. doi: 10.1016/j.icrp.2007.10.003 [published Online First: 2007/12/18]
9. ICRP Publication 105. Radiation protection in medicine. *Ann ICRP* 2007;37(6):1-63. doi: 10.1016/j.icrp.2008.08.001 [published Online First: 2008/09/03]
10. Vano E, Miller DL, Martin CJ, et al. ICRP Publication 135: Diagnostic Reference Levels in Medical Imaging. *Ann ICRP* 2017;46(1):1-144. doi: 10.1177/0146645317717209 [published Online First: 2017/10/27]
11. Diagnostic Reference Levels Based on Latest Surveys in Japan -Japan DRLs 2015-2015 [Available from: <http://www.radher.jp/J-RIME/report/DRLhoukokusyoEng.pdf> accessed July 9th, 2019.
12. Hart D, Wall BF. UK population dose from medical X-ray examinations. *Eur J Radiol* 2004;50(3):285-91. doi: 10.1016/S0720-048X(03)00178-5 [published Online First: 2004/05/18]
13. Hayashi S, Takenaka M, Hosono M, et al. Radiation exposure during image-guided endoscopic procedures: The next quality indicator for endoscopic retrograde cholangiopancreatography. *World Journal of Clinical Cases* 2018;6(16):1087-93. doi: 10.12998/wjcc.v6.i16.1087
14. Dumonceau JM, Garcia-Fernandez FJ, Verdun FR, et al. Radiation protection in



- 1  
2  
3  
4  
5  
6 digestive endoscopy: European Society of Digestive Endoscopy (ESGE)  
7  
8 guideline. *Endoscopy* 2012;44(4):408-21. doi: 10.1055/s-0031-1291791  
9  
10 [published Online First: 2012/03/23]  
11  
12  
13  
14 15. Adler DG, Lieb JG, 2nd, Cohen J, et al. Quality indicators for ERCP. *Gastrointestinal*  
15  
16 *endoscopy* 2015;81(1):54-66. doi: 10.1016/j.gie.2014.07.056 [published Online  
17  
18 First: 2014/12/07]  
19  
20  
21 16. Matsuda K, Tanaka K, Fujishiro M, et al. Design paper: Japan Endoscopy Database  
22  
23 (JED): A prospective, large database project related to gastroenterological  
24  
25 endoscopy in Japan. *Digestive endoscopy : official journal of the Japan*  
26  
27 *Gastroenterological Endoscopy Society* 2018;30(1):5-19. doi:  
28  
29 10.1111/den.12964 [published Online First: 2017/09/15]  
30  
31  
32  
33 17. Hayashi S, Nishida T, Shimakoshi H, et al. Mo2020 Novel Processing Engine for X-  
34  
35 Ray Fluoroscopic Images (Faice-V Ns1) Can Reduce Radiation Exposure in the  
36  
37 Procedure of ERCP But Keep the Quality of Images. *Gastrointestinal endoscopy*  
38  
39 2017;85(5):AB518. doi: 10.1016/j.gie.2017.03.1207  
40  
41  
42  
43 18. Hayashi S, Nishida T, Matsubara T, et al. Radiation exposure dose and influencing  
44  
45 factors during endoscopic retrograde cholangiopancreatography. *PloS one*  
46  
47 2018;13(11):e0207539. doi: 10.1371/journal.pone.0207539 [published Online  
48  
49 First: 2018/11/20]  
50  
51  
52  
53 19. Hayashi S, Higaki Y, Tomita R, et al. 940 Disease Site and Processing Engine Affect  
54  
55 Radiation Exposure Dose during Ercp. *Gastrointestinal endoscopy*  
56  
57 2018;87(6):AB137. doi: 10.1016/j.gie.2018.04.1348  
58  
59  
60

- 1  
2  
3  
4  
5  
6 20. Takenaka M, Hayashi S, Nishida T, et al. Mo1090 EXAMINATION OF ACTUAL  
7  
8 RADIATION EXPOSURE DOSE OF THE PATIENTS WHO PERFORMED EUS-  
9  
10 GUIDED DRAINAGE (EUS-BD/EUS-PD/EUS-CD). *Gastrointestinal endoscopy*  
11  
12 2019;89(6):AB444-AB45. doi: 10.1016/j.gie.2019.03.1247  
13  
14  
15  
16 21. Vassileva J, Rehani M. Diagnostic reference levels. *AJR American journal of*  
17  
18 *roentgenology* 2015;204(1):W1-3. doi: 10.2214/AJR.14.12794 [published Online  
19  
20 First: 2014/12/30]  
21  
22  
23  
24  
25  
26  
27  
28  
29  
30  
31  
32  
33  
34  
35  
36  
37  
38  
39  
40  
41  
42  
43  
44  
45  
46  
47  
48  
49  
50  
51  
52  
53  
54  
55  
56  
57  
58  
59  
60

1  
2  
3  
4  
5  
6  
7  
8  
9  
10  
11  
12  
13  
14  
15  
16  
17  
18  
19  
20  
21  
22  
23  
24  
25  
26  
27  
28  
29  
30  
31  
32  
33  
34  
35  
36  
37  
38  
39  
40  
41  
42  
43  
44  
45  
46  
47  
48  
49  
50  
51  
52  
53  
54  
55  
56  
57  
58  
59  
60

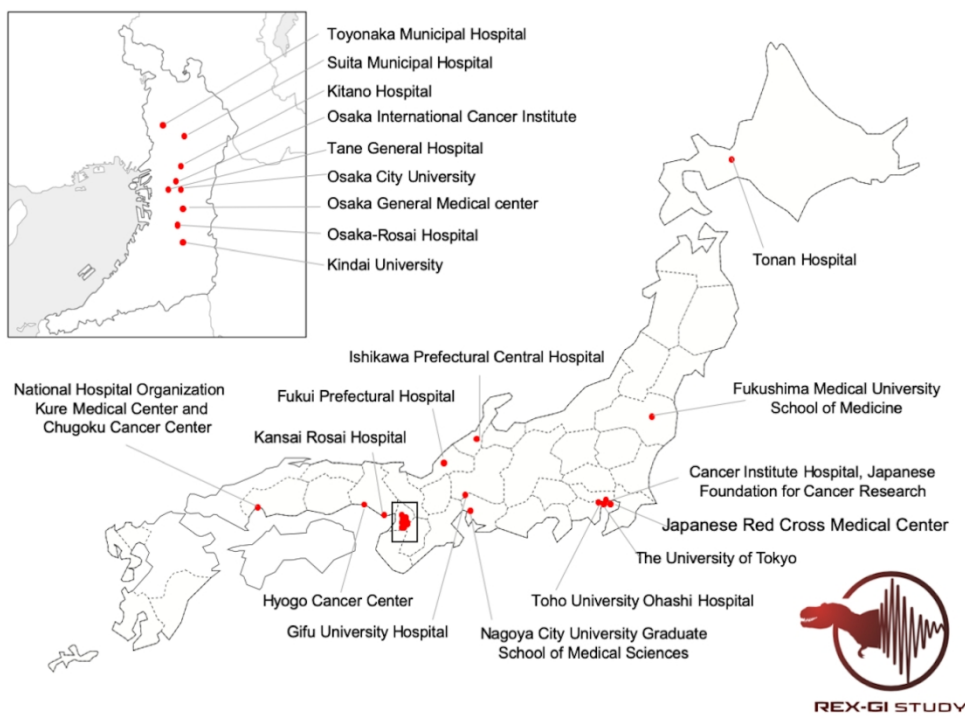

Figure 1. The participating hospitals in this study.

119x90mm (300 x 300 DPI)

# Reporting checklist for protocol of a clinical trial.

Based on the SPIRIT guidelines.

## Instructions to authors

Complete this checklist by entering the page numbers from your manuscript where readers will find each of the items listed below.

Your article may not currently address all the items on the checklist. Please modify your text to include the missing information. If you are certain that an item does not apply, please write "n/a" and provide a short explanation.

Upload your completed checklist as an extra file when you submit to a journal.

In your methods section, say that you used the SPIRIT reporting guidelines, and cite them as:

Chan A-W, Tetzlaff JM, Altman DG, Laupacis A, Gøtzsche PC, Krleža-Jerić K, Hróbjartsson A, Mann H, Dickersin K, Berlin J, Doré C, Parulekar W, Summerskill W, Groves T, Schulz K, Sox H, Rockhold FW, Rennie D, Moher D. SPIRIT 2013 Statement: Defining standard protocol items for clinical trials. *Ann Intern Med.* 2013;158(3):200-207

|                                             |                     | Reporting Item                                                                                               | Page Number |
|---------------------------------------------|---------------------|--------------------------------------------------------------------------------------------------------------|-------------|
| <b>Administrative information</b>           |                     |                                                                                                              |             |
| Title                                       | <a href="#">#1</a>  | Descriptive title identifying the study design, population, interventions, and, if applicable, trial acronym | 1           |
| Trial registration                          | <a href="#">#2a</a> | Trial identifier and registry name. If not yet registered, name of intended registry                         | 6, 11       |
| Trial registration: data set                | <a href="#">#2b</a> | All items from the World Health Organization Trial Registration Data Set                                     | 6, 11       |
| Protocol version                            | <a href="#">#3</a>  | Date and version identifier                                                                                  | 16          |
| Funding                                     | <a href="#">#4</a>  | Sources and types of financial, material, and other support                                                  | 17          |
| Roles and responsibilities: contributorship | <a href="#">#5a</a> | Names, affiliations, and roles of protocol contributors                                                      | 15          |

|    |                           |                     |                                                                    |        |
|----|---------------------------|---------------------|--------------------------------------------------------------------|--------|
| 1  | Roles and                 | <a href="#">#5b</a> | Name and contact information for the trial sponsor                 | N.A.   |
| 2  | responsibilities:         |                     |                                                                    |        |
| 3  | sponsor contact           |                     |                                                                    |        |
| 4  | information               |                     |                                                                    |        |
| 5  |                           |                     |                                                                    |        |
| 6  |                           |                     |                                                                    |        |
| 7  |                           |                     |                                                                    |        |
| 8  | Roles and                 | <a href="#">#5c</a> | Role of study sponsor and funders, if any, in study design;        | N.A.   |
| 9  | responsibilities:         |                     | collection, management, analysis, and interpretation of data;      |        |
| 10 | sponsor and funder        |                     | writing of the report; and the decision to submit the report for   |        |
| 11 |                           |                     | publication, including whether they will have ultimate authority   |        |
| 12 |                           |                     | over any of these activities                                       |        |
| 13 |                           |                     |                                                                    |        |
| 14 |                           |                     |                                                                    |        |
| 15 |                           |                     |                                                                    |        |
| 16 | Roles and                 | <a href="#">#5d</a> | Composition, roles, and responsibilities of the coordinating       | 12, 14 |
| 17 | responsibilities:         |                     | centre, steering committee, endpoint adjudication committee,       |        |
| 18 | committees                |                     | data management team, and other individuals or groups              |        |
| 19 |                           |                     | overseeing the trial, if applicable (see Item 21a for data         |        |
| 20 |                           |                     | monitoring committee)                                              |        |
| 21 |                           |                     |                                                                    |        |
| 22 |                           |                     |                                                                    |        |
| 23 |                           |                     |                                                                    |        |
| 24 | <b>Introduction</b>       |                     |                                                                    |        |
| 25 |                           |                     |                                                                    |        |
| 26 | Background and            | <a href="#">#6a</a> | Description of research question and justification for undertaking | 8-10   |
| 27 | rationale                 |                     | the trial, including summary of relevant studies (published and    |        |
| 28 |                           |                     | unpublished) examining benefits and harms for each intervention    |        |
| 29 |                           |                     |                                                                    |        |
| 30 |                           |                     |                                                                    |        |
| 31 |                           |                     |                                                                    |        |
| 32 | Background and            | <a href="#">#6b</a> | Explanation for choice of comparators                              | 9      |
| 33 | rationale: choice of      |                     |                                                                    |        |
| 34 | comparators               |                     |                                                                    |        |
| 35 |                           |                     |                                                                    |        |
| 36 |                           |                     |                                                                    |        |
| 37 | Objectives                | <a href="#">#7</a>  | Specific objectives or hypotheses                                  | 9-10   |
| 38 |                           |                     |                                                                    |        |
| 39 |                           |                     |                                                                    |        |
| 40 | Trial design              | <a href="#">#8</a>  | Description of trial design including type of trial (eg, parallel  | 11     |
| 41 |                           |                     | group, crossover, factorial, single group), allocation ratio, and  |        |
| 42 |                           |                     | framework (eg, superiority, equivalence, non-inferiority,          |        |
| 43 |                           |                     | exploratory)                                                       |        |
| 44 |                           |                     |                                                                    |        |
| 45 |                           |                     |                                                                    |        |
| 46 | <b>Methods:</b>           |                     |                                                                    |        |
| 47 | <b>Participants,</b>      |                     |                                                                    |        |
| 48 | <b>interventions, and</b> |                     |                                                                    |        |
| 49 | <b>outcomes</b>           |                     |                                                                    |        |
| 50 |                           |                     |                                                                    |        |
| 51 |                           |                     |                                                                    |        |
| 52 |                           |                     |                                                                    |        |
| 53 | Study setting             | <a href="#">#9</a>  | Description of study settings (eg, community clinic, academic      | 12     |
| 54 |                           |                     | hospital) and list of countries where data will be collected.      |        |
| 55 |                           |                     | Reference to where list of study sites can be obtained             |        |
| 56 |                           |                     |                                                                    |        |
| 57 |                           |                     |                                                                    |        |
| 58 |                           |                     |                                                                    |        |
| 59 |                           |                     |                                                                    |        |
| 60 |                           |                     |                                                                    |        |

|    |                              |                      |                                                                                                                                                                                                                                                                                                                                                                                |      |
|----|------------------------------|----------------------|--------------------------------------------------------------------------------------------------------------------------------------------------------------------------------------------------------------------------------------------------------------------------------------------------------------------------------------------------------------------------------|------|
| 1  | Eligibility criteria         | <a href="#">#10</a>  | Inclusion and exclusion criteria for participants. If applicable, eligibility criteria for study centres and individuals who will perform the interventions (eg, surgeons, psychotherapists)                                                                                                                                                                                   | 12   |
| 2  |                              |                      |                                                                                                                                                                                                                                                                                                                                                                                |      |
| 3  |                              |                      |                                                                                                                                                                                                                                                                                                                                                                                |      |
| 4  |                              |                      |                                                                                                                                                                                                                                                                                                                                                                                |      |
| 5  |                              |                      |                                                                                                                                                                                                                                                                                                                                                                                |      |
| 6  | Interventions:               | <a href="#">#11a</a> | Interventions for each group with sufficient detail to allow replication, including how and when they will be administered                                                                                                                                                                                                                                                     | N.A. |
| 7  | description                  |                      |                                                                                                                                                                                                                                                                                                                                                                                |      |
| 8  |                              |                      |                                                                                                                                                                                                                                                                                                                                                                                |      |
| 9  |                              |                      |                                                                                                                                                                                                                                                                                                                                                                                |      |
| 10 | Interventions:               | <a href="#">#11b</a> | Criteria for discontinuing or modifying allocated interventions for a given trial participant (eg, drug dose change in response to harms, participant request, or improving / worsening disease)                                                                                                                                                                               | N.A. |
| 11 | modifications                |                      |                                                                                                                                                                                                                                                                                                                                                                                |      |
| 12 |                              |                      |                                                                                                                                                                                                                                                                                                                                                                                |      |
| 13 |                              |                      |                                                                                                                                                                                                                                                                                                                                                                                |      |
| 14 |                              |                      |                                                                                                                                                                                                                                                                                                                                                                                |      |
| 15 | Interventions:               | <a href="#">#11c</a> | Strategies to improve adherence to intervention protocols, and any procedures for monitoring adherence (eg, drug tablet return; laboratory tests)                                                                                                                                                                                                                              | N.A. |
| 16 | adherence                    |                      |                                                                                                                                                                                                                                                                                                                                                                                |      |
| 17 |                              |                      |                                                                                                                                                                                                                                                                                                                                                                                |      |
| 18 |                              |                      |                                                                                                                                                                                                                                                                                                                                                                                |      |
| 19 |                              |                      |                                                                                                                                                                                                                                                                                                                                                                                |      |
| 20 | Interventions:               | <a href="#">#11d</a> | Relevant concomitant care and interventions that are permitted or prohibited during the trial                                                                                                                                                                                                                                                                                  | N.A. |
| 21 | concomitant care             |                      |                                                                                                                                                                                                                                                                                                                                                                                |      |
| 22 |                              |                      |                                                                                                                                                                                                                                                                                                                                                                                |      |
| 23 |                              |                      |                                                                                                                                                                                                                                                                                                                                                                                |      |
| 24 | Outcomes                     | <a href="#">#12</a>  | Primary, secondary, and other outcomes, including the specific measurement variable (eg, systolic blood pressure), analysis metric (eg, change from baseline, final value, time to event), method of aggregation (eg, median, proportion), and time point for each outcome. Explanation of the clinical relevance of chosen efficacy and harm outcomes is strongly recommended | 13   |
| 25 |                              |                      |                                                                                                                                                                                                                                                                                                                                                                                |      |
| 26 |                              |                      |                                                                                                                                                                                                                                                                                                                                                                                |      |
| 27 |                              |                      |                                                                                                                                                                                                                                                                                                                                                                                |      |
| 28 |                              |                      |                                                                                                                                                                                                                                                                                                                                                                                |      |
| 29 |                              |                      |                                                                                                                                                                                                                                                                                                                                                                                |      |
| 30 |                              |                      |                                                                                                                                                                                                                                                                                                                                                                                |      |
| 31 |                              |                      |                                                                                                                                                                                                                                                                                                                                                                                |      |
| 32 |                              |                      |                                                                                                                                                                                                                                                                                                                                                                                |      |
| 33 |                              |                      |                                                                                                                                                                                                                                                                                                                                                                                |      |
| 34 | Participant timeline         | <a href="#">#13</a>  | Time schedule of enrolment, interventions (including any run-ins and washouts), assessments, and visits for participants. A schematic diagram is highly recommended (see Figure)                                                                                                                                                                                               | 15   |
| 35 |                              |                      |                                                                                                                                                                                                                                                                                                                                                                                |      |
| 36 |                              |                      |                                                                                                                                                                                                                                                                                                                                                                                |      |
| 37 |                              |                      |                                                                                                                                                                                                                                                                                                                                                                                |      |
| 38 |                              |                      |                                                                                                                                                                                                                                                                                                                                                                                |      |
| 39 |                              |                      |                                                                                                                                                                                                                                                                                                                                                                                |      |
| 40 | Sample size                  | <a href="#">#14</a>  | Estimated number of participants needed to achieve study objectives and how it was determined, including clinical and statistical assumptions supporting any sample size calculations                                                                                                                                                                                          | 13   |
| 41 |                              |                      |                                                                                                                                                                                                                                                                                                                                                                                |      |
| 42 |                              |                      |                                                                                                                                                                                                                                                                                                                                                                                |      |
| 43 |                              |                      |                                                                                                                                                                                                                                                                                                                                                                                |      |
| 44 |                              |                      |                                                                                                                                                                                                                                                                                                                                                                                |      |
| 45 | Recruitment                  | <a href="#">#15</a>  | Strategies for achieving adequate participant enrolment to reach target sample size                                                                                                                                                                                                                                                                                            | 14   |
| 46 |                              |                      |                                                                                                                                                                                                                                                                                                                                                                                |      |
| 47 |                              |                      |                                                                                                                                                                                                                                                                                                                                                                                |      |
| 48 |                              |                      |                                                                                                                                                                                                                                                                                                                                                                                |      |
| 49 | <b>Methods: Assignment</b>   |                      |                                                                                                                                                                                                                                                                                                                                                                                |      |
| 50 | <b>of interventions (for</b> |                      |                                                                                                                                                                                                                                                                                                                                                                                |      |
| 51 | <b>controlled trials)</b>    |                      |                                                                                                                                                                                                                                                                                                                                                                                |      |
| 52 |                              |                      |                                                                                                                                                                                                                                                                                                                                                                                |      |
| 53 |                              |                      |                                                                                                                                                                                                                                                                                                                                                                                |      |
| 54 | Allocation: sequence         | <a href="#">#16a</a> | Method of generating the allocation sequence (eg, computer-generated random numbers), and list of any factors for stratification. To reduce predictability of a random sequence, details of any planned restriction (eg, blocking) should be                                                                                                                                   | N.A. |
| 55 | generation                   |                      |                                                                                                                                                                                                                                                                                                                                                                                |      |
| 56 |                              |                      |                                                                                                                                                                                                                                                                                                                                                                                |      |
| 57 |                              |                      |                                                                                                                                                                                                                                                                                                                                                                                |      |
| 58 |                              |                      |                                                                                                                                                                                                                                                                                                                                                                                |      |
| 59 |                              |                      |                                                                                                                                                                                                                                                                                                                                                                                |      |
| 60 |                              |                      |                                                                                                                                                                                                                                                                                                                                                                                |      |

provided in a separate document that is unavailable to those who enrol participants or assign interventions

|    |                        |                      |                                                                     |
|----|------------------------|----------------------|---------------------------------------------------------------------|
| 1  |                        |                      |                                                                     |
| 2  |                        |                      |                                                                     |
| 3  |                        |                      |                                                                     |
| 4  | Allocation             | <a href="#">#16b</a> | Mechanism of implementing the allocation sequence (eg, central      |
| 5  | concealment            |                      | telephone; sequentially numbered, opaque, sealed envelopes),        |
| 6  |                        |                      | describing any steps to conceal the sequence until interventions    |
| 7  | mechanism              |                      | are assigned                                                        |
| 8  |                        |                      |                                                                     |
| 9  |                        |                      |                                                                     |
| 10 |                        |                      |                                                                     |
| 11 | Allocation:            | <a href="#">#16c</a> | Who will generate the allocation sequence, who will enrol           |
| 12 | implementation         |                      | participants, and who will assign participants to interventions     |
| 13 |                        |                      |                                                                     |
| 14 |                        |                      |                                                                     |
| 15 | Blinding (masking)     | <a href="#">#17a</a> | Who will be blinded after assignment to interventions (eg, trial    |
| 16 |                        |                      | participants, care providers, outcome assessors, data analysts),    |
| 17 |                        |                      | and how                                                             |
| 18 |                        |                      |                                                                     |
| 19 |                        |                      |                                                                     |
| 20 | Blinding (masking):    | <a href="#">#17b</a> | If blinded, circumstances under which unblinding is permissible,    |
| 21 | emergency unblinding   |                      | and procedure for revealing a participant's allocated intervention  |
| 22 |                        |                      | during the trial                                                    |
| 23 |                        |                      |                                                                     |
| 24 |                        |                      |                                                                     |
| 25 | <b>Methods: Data</b>   |                      |                                                                     |
| 26 | <b>collection,</b>     |                      |                                                                     |
| 27 | <b>management, and</b> |                      |                                                                     |
| 28 | <b>analysis</b>        |                      |                                                                     |
| 29 |                        |                      |                                                                     |
| 30 |                        |                      |                                                                     |
| 31 |                        |                      |                                                                     |
| 32 | Data collection plan   | <a href="#">#18a</a> | Plans for assessment and collection of outcome, baseline, and       |
| 33 |                        |                      | other trial data, including any related processes to promote data   |
| 34 |                        |                      | quality (eg, duplicate measurements, training of assessors) and a   |
| 35 |                        |                      | description of study instruments (eg, questionnaires, laboratory    |
| 36 |                        |                      | tests) along with their reliability and validity, if known.         |
| 37 |                        |                      | Reference to where data collection forms can be found, if not in    |
| 38 |                        |                      | the protocol                                                        |
| 39 |                        |                      |                                                                     |
| 40 |                        |                      |                                                                     |
| 41 |                        |                      |                                                                     |
| 42 |                        |                      |                                                                     |
| 43 | Data collection plan:  | <a href="#">#18b</a> | Plans to promote participant retention and complete follow-up,      |
| 44 | retention              |                      | including list of any outcome data to be collected for participants |
| 45 |                        |                      | who discontinue or deviate from intervention protocols              |
| 46 |                        |                      |                                                                     |
| 47 |                        |                      |                                                                     |
| 48 |                        |                      |                                                                     |
| 49 | Data management        | <a href="#">#19</a>  | Plans for data entry, coding, security, and storage, including any  |
| 50 |                        |                      | related processes to promote data quality (eg, double data entry;   |
| 51 |                        |                      | range checks for data values). Reference to where details of data   |
| 52 |                        |                      | management procedures can be found, if not in the protocol          |
| 53 |                        |                      |                                                                     |
| 54 |                        |                      |                                                                     |
| 55 | Statistics: outcomes   | <a href="#">#20a</a> | Statistical methods for analysing primary and secondary             |
| 56 |                        |                      | outcomes. Reference to where other details of the statistical       |
| 57 |                        |                      | analysis plan can be found, if not in the protocol                  |
| 58 |                        |                      |                                                                     |
| 59 |                        |                      |                                                                     |
| 60 |                        |                      |                                                                     |

|    |                            |                      |                                                                    |      |
|----|----------------------------|----------------------|--------------------------------------------------------------------|------|
| 1  | Statistics: additional     | <a href="#">#20b</a> | Methods for any additional analyses (eg, subgroup and adjusted     | N.A. |
| 2  | analyses                   |                      | analyses)                                                          |      |
| 3  |                            |                      |                                                                    |      |
| 4  | Statistics: analysis       | <a href="#">#20c</a> | Definition of analysis population relating to protocol non-        | 15   |
| 5  | population and missing     |                      | adherence (eg, as randomised analysis), and any statistical        |      |
| 6  | data                       |                      | methods to handle missing data (eg, multiple imputation)           |      |
| 7  |                            |                      |                                                                    |      |
| 8  |                            |                      |                                                                    |      |
| 9  |                            |                      |                                                                    |      |
| 10 | <b>Methods: Monitoring</b> |                      |                                                                    |      |
| 11 |                            |                      |                                                                    |      |
| 12 | Data monitoring:           | <a href="#">#21a</a> | Composition of data monitoring committee (DMC); summary of         | 15   |
| 13 | formal committee           |                      | its role and reporting structure; statement of whether it is       |      |
| 14 |                            |                      | independent from the sponsor and competing interests; and          |      |
| 15 |                            |                      | reference to where further details about its charter can be found, |      |
| 16 |                            |                      | if not in the protocol. Alternatively, an explanation of why a     |      |
| 17 |                            |                      | DMC is not needed                                                  |      |
| 18 |                            |                      |                                                                    |      |
| 19 |                            |                      |                                                                    |      |
| 20 |                            |                      |                                                                    |      |
| 21 |                            |                      |                                                                    |      |
| 22 | Data monitoring:           | <a href="#">#21b</a> | Description of any interim analyses and stopping guidelines,       | 15   |
| 23 | interim analysis           |                      | including who will have access to these interim results and make   |      |
| 24 |                            |                      | the final decision to terminate the trial                          |      |
| 25 |                            |                      |                                                                    |      |
| 26 |                            |                      |                                                                    |      |
| 27 | Harms                      | <a href="#">#22</a>  | Plans for collecting, assessing, reporting, and managing solicited | N.A. |
| 28 |                            |                      | and spontaneously reported adverse events and other unintended     |      |
| 29 |                            |                      | effects of trial interventions or trial conduct                    |      |
| 30 |                            |                      |                                                                    |      |
| 31 |                            |                      |                                                                    |      |
| 32 |                            |                      |                                                                    |      |
| 33 | Auditing                   | <a href="#">#23</a>  | Frequency and procedures for auditing trial conduct, if any, and   | N.A. |
| 34 |                            |                      | whether the process will be independent from investigators and     |      |
| 35 |                            |                      | the sponsor                                                        |      |
| 36 |                            |                      |                                                                    |      |
| 37 |                            |                      |                                                                    |      |
| 38 | <b>Ethics and</b>          |                      |                                                                    |      |
| 39 | <b>dissemination</b>       |                      |                                                                    |      |
| 40 |                            |                      |                                                                    |      |
| 41 |                            |                      |                                                                    |      |
| 42 | Research ethics            | <a href="#">#24</a>  | Plans for seeking research ethics committee / institutional review | 15   |
| 43 | approval                   |                      | board (REC / IRB) approval                                         |      |
| 44 |                            |                      |                                                                    |      |
| 45 |                            |                      |                                                                    |      |
| 46 | Protocol amendments        | <a href="#">#25</a>  | Plans for communicating important protocol modifications (eg,      | N.A. |
| 47 |                            |                      | changes to eligibility criteria, outcomes, analyses) to relevant   |      |
| 48 |                            |                      | parties (eg, investigators, REC / IRBs, trial participants, trial  |      |
| 49 |                            |                      | registries, journals, regulators)                                  |      |
| 50 |                            |                      |                                                                    |      |
| 51 |                            |                      |                                                                    |      |
| 52 |                            |                      |                                                                    |      |
| 53 | Consent or assent          | <a href="#">#26a</a> | Who will obtain informed consent or assent from potential trial    | 15   |
| 54 |                            |                      | participants or authorised surrogates, and how (see Item 32)       |      |
| 55 |                            |                      |                                                                    |      |
| 56 |                            |                      |                                                                    |      |
| 57 |                            |                      |                                                                    |      |
| 58 |                            |                      |                                                                    |      |
| 59 |                            |                      |                                                                    |      |
| 60 |                            |                      |                                                                    |      |



|    |                          |                      |                                                                      |        |
|----|--------------------------|----------------------|----------------------------------------------------------------------|--------|
| 1  | Consent or assent:       | <a href="#">#26b</a> | Additional consent provisions for collection and use of              | N.A.   |
| 2  | ancillary studies        |                      | participant data and biological specimens in ancillary studies, if   |        |
| 3  |                          |                      | applicable                                                           |        |
| 4  |                          |                      |                                                                      |        |
| 5  |                          |                      |                                                                      |        |
| 6  | Confidentiality          | <a href="#">#27</a>  | How personal information about potential and enrolled                | 14     |
| 7  |                          |                      | participants will be collected, shared, and maintained in order to   |        |
| 8  |                          |                      | protect confidentiality before, during, and after the trial          |        |
| 9  |                          |                      |                                                                      |        |
| 10 |                          |                      |                                                                      |        |
| 11 | Declaration of interests | <a href="#">#28</a>  | Financial and other competing interests for principal investigators  | 17, 18 |
| 12 |                          |                      | for the overall trial and each study site                            |        |
| 13 |                          |                      |                                                                      |        |
| 14 |                          |                      |                                                                      |        |
| 15 | Data access              | <a href="#">#29</a>  | Statement of who will have access to the final trial dataset, and    | 17     |
| 16 |                          |                      | disclosure of contractual agreements that limit such access for      |        |
| 17 |                          |                      | investigators                                                        |        |
| 18 |                          |                      |                                                                      |        |
| 19 |                          |                      |                                                                      |        |
| 20 | Ancillary and post trial | <a href="#">#30</a>  | Provisions, if any, for ancillary and post-trial care, and for       | N.A.   |
| 21 | care                     |                      | compensation to those who suffer harm from trial participation       |        |
| 22 |                          |                      |                                                                      |        |
| 23 |                          |                      |                                                                      |        |
| 24 | Dissemination policy:    | <a href="#">#31a</a> | Plans for investigators and sponsor to communicate trial results     | 14     |
| 25 | trial results            |                      | to participants, healthcare professionals, the public, and other     |        |
| 26 |                          |                      | relevant groups (eg, via publication, reporting in results           |        |
| 27 |                          |                      | databases, or other data sharing arrangements), including any        |        |
| 28 |                          |                      | publication restrictions                                             |        |
| 29 |                          |                      |                                                                      |        |
| 30 |                          |                      |                                                                      |        |
| 31 |                          |                      |                                                                      |        |
| 32 |                          |                      |                                                                      |        |
| 33 | Dissemination policy:    | <a href="#">#31b</a> | Authorship eligibility guidelines and any intended use of            | 18     |
| 34 | authorship               |                      | professional writers                                                 |        |
| 35 |                          |                      |                                                                      |        |
| 36 |                          |                      |                                                                      |        |
| 37 | Dissemination policy:    | <a href="#">#31c</a> | Plans, if any, for granting public access to the full protocol,      | N.A.   |
| 38 | reproducible research    |                      | participant-level dataset, and statistical code                      |        |
| 39 |                          |                      |                                                                      |        |
| 40 |                          |                      |                                                                      |        |
| 41 | <b>Appendices</b>        |                      |                                                                      |        |
| 42 |                          |                      |                                                                      |        |
| 43 | Informed consent         | <a href="#">#32</a>  | Model consent form and other related documentation given to          | N.A.   |
| 44 | materials                |                      | participants and authorised surrogates                               |        |
| 45 |                          |                      |                                                                      |        |
| 46 |                          |                      |                                                                      |        |
| 47 | Biological specimens     | <a href="#">#33</a>  | Plans for collection, laboratory evaluation, and storage of          | N.A.   |
| 48 |                          |                      | biological specimens for genetic or molecular analysis in the        |        |
| 49 |                          |                      | current trial and for future use in ancillary studies, if applicable |        |
| 50 |                          |                      |                                                                      |        |
| 51 |                          |                      |                                                                      |        |

None The SPIRIT checklist is distributed under the terms of the Creative Commons Attribution License CC-BY-ND 3.0. This checklist can be completed online using <https://www.goodreports.org/>, a tool made by the [EQUATOR Network](#) in collaboration with [Penelope.ai](#)

# BMJ Open

## A Multicenter Prospective Observational Study Protocol for Radiation Exposure from Gastrointestinal Fluoroscopic Procedures (REX-GI study)

|                               |                                                                                                                                                                                                                                                                                                                                                                                                                                                                                                                                                                                                                                                                                                                                                                                                                                                                                                                                                                                                                                                                                                                                                                                                                                                                                                                                                                                                                                                                                                                                                                                                                                                                                                                                                                                                                                                                                                                                                                                                                                                      |
|-------------------------------|------------------------------------------------------------------------------------------------------------------------------------------------------------------------------------------------------------------------------------------------------------------------------------------------------------------------------------------------------------------------------------------------------------------------------------------------------------------------------------------------------------------------------------------------------------------------------------------------------------------------------------------------------------------------------------------------------------------------------------------------------------------------------------------------------------------------------------------------------------------------------------------------------------------------------------------------------------------------------------------------------------------------------------------------------------------------------------------------------------------------------------------------------------------------------------------------------------------------------------------------------------------------------------------------------------------------------------------------------------------------------------------------------------------------------------------------------------------------------------------------------------------------------------------------------------------------------------------------------------------------------------------------------------------------------------------------------------------------------------------------------------------------------------------------------------------------------------------------------------------------------------------------------------------------------------------------------------------------------------------------------------------------------------------------------|
| Journal:                      | <i>BMJ Open</i>                                                                                                                                                                                                                                                                                                                                                                                                                                                                                                                                                                                                                                                                                                                                                                                                                                                                                                                                                                                                                                                                                                                                                                                                                                                                                                                                                                                                                                                                                                                                                                                                                                                                                                                                                                                                                                                                                                                                                                                                                                      |
| Manuscript ID                 | bmjopen-2019-033604.R1                                                                                                                                                                                                                                                                                                                                                                                                                                                                                                                                                                                                                                                                                                                                                                                                                                                                                                                                                                                                                                                                                                                                                                                                                                                                                                                                                                                                                                                                                                                                                                                                                                                                                                                                                                                                                                                                                                                                                                                                                               |
| Article Type:                 | Protocol                                                                                                                                                                                                                                                                                                                                                                                                                                                                                                                                                                                                                                                                                                                                                                                                                                                                                                                                                                                                                                                                                                                                                                                                                                                                                                                                                                                                                                                                                                                                                                                                                                                                                                                                                                                                                                                                                                                                                                                                                                             |
| Date Submitted by the Author: | 28-Nov-2019                                                                                                                                                                                                                                                                                                                                                                                                                                                                                                                                                                                                                                                                                                                                                                                                                                                                                                                                                                                                                                                                                                                                                                                                                                                                                                                                                                                                                                                                                                                                                                                                                                                                                                                                                                                                                                                                                                                                                                                                                                          |
| Complete List of Authors:     | <p>Nishida, Tsutomu ; Toyonaka Municipal Hospital, Department of Gastroenterology<br/> Hayashi, Shiro; Toyonaka Municipal Hospital, Department of Gastroenterology; Kento Hayashi Clinic, Department of Gastroenterology and Internal Medicine<br/> Takenaka, Mamoru ; Kindai University, Department of Gastroenterology and Hepatology<br/> Hosono, Makoto ; Kindai University, Department of Radiology<br/> Kogure, Hirofumi; The University of Tokyo, Department of Gastroenterology<br/> Hasatani, Kenkei ; Fukui Prefectural Hospital, Department of Gastroenterology<br/> Yamaguchi, Shinjiro ; Kansai Rosai Hospital, Department of Gastroenterology and Hepatology<br/> Maruyama, Hirotsugu ; Osaka City University, Department of Gastroenterology<br/> Doyama, Hisashi ; Ishikawa Prefectural Central Hospital, Department of Gastroenterology<br/> Ihara, Hideyuki ; Tonan Hospital, Department of Gastroenterology<br/> Yoshio, Toshiyuki ; Cancer Institute Hospital, Japanese Foundation for Cancer Research, Department of Gastroenterology<br/> Nagaike, Koji ; Suita Municipal Hospital, Department of Gastroenterology and Hepatology<br/> Yamada, Takuya ; Osaka Rosai Hospital, Department of Gastroenterology and Hepatology,<br/> Yakushijin, Takayuki ; Osaka General Medical Center, Department of Gastroenterology and Hepatology<br/> Takagi, Tadayuki ; Fukushima Medical University School of Medicine, Department of Gastroenterology<br/> Tsumura, Hidetaka ; Hyogo Cancer Center, Department of Gastroenterological Oncology,<br/> Kurita, Akira ; Kitano Hospital, Department of Gastroenterology and Hepatology, Digestive Disease Center<br/> Asai, Satoshi ; Tane General Hospital, Department of Gastroenterology<br/> Ito, Yukiko ; Japanese Red Cross Medical Center, Department of Gastroenterology<br/> Kuwai, Toshio ; Kure Medical Center, Department of Gastroenterology<br/> Hori, Yasuki ; Nagoya City University Graduate School of Medical Sciences Department of Gastroenterology and Metabolism</p> |

|                                  |                                                                                                                                                                                                                                                                                                                                                                                                                                                                                                          |
|----------------------------------|----------------------------------------------------------------------------------------------------------------------------------------------------------------------------------------------------------------------------------------------------------------------------------------------------------------------------------------------------------------------------------------------------------------------------------------------------------------------------------------------------------|
|                                  | Maetani, Iruru ; Toho University Ohashi Medical Center, Division of Gastroenterology and Hepatology, Department of Internal Medicine<br>Ikezawa, Kenji ; Osaka International Cancer Institute, Department of Hepatobiliary and Pancreatic Oncology<br>Iwashita, Takuji ; Gifu University Hospital, First Department of Internal Medicine<br>Matsumoto, Kengo; Toyonaka Municipal Hospital, Department of Gastroenterology<br>Inada, Masami ; Toyonaka Municipal Hospital, Department of Gastroenterology |
| <b>Primary Subject Heading</b> : | Gastroenterology and hepatology                                                                                                                                                                                                                                                                                                                                                                                                                                                                          |
| Secondary Subject Heading:       | Radiology and imaging, Public health, Research methods                                                                                                                                                                                                                                                                                                                                                                                                                                                   |
| Keywords:                        | Radiation Exposure, Diagnostic Reference Levels, ERCP, Gastrointestinal Fluoroscopic Procedure, Endoscopy < GASTROENTEROLOGY                                                                                                                                                                                                                                                                                                                                                                             |
|                                  |                                                                                                                                                                                                                                                                                                                                                                                                                                                                                                          |

SCHOLARONE™  
Manuscripts



I, the Submitting Author has the right to grant and does grant on behalf of all authors of the Work (as defined in the below author licence), an exclusive licence and/or a non-exclusive licence for contributions from authors who are: i) UK Crown employees; ii) where BMJ has agreed a CC-BY licence shall apply, and/or iii) in accordance with the terms applicable for US Federal Government officers or employees acting as part of their official duties; on a worldwide, perpetual, irrevocable, royalty-free basis to BMJ Publishing Group Ltd ("BMJ") its licensees and where the relevant Journal is co-owned by BMJ to the co-owners of the Journal, to publish the Work in this journal and any other BMJ products and to exploit all rights, as set out in our [licence](#).

The Submitting Author accepts and understands that any supply made under these terms is made by BMJ to the Submitting Author unless you are acting as an employee on behalf of your employer or a postgraduate student of an affiliated institution which is paying any applicable article publishing charge ("APC") for Open Access articles. Where the Submitting Author wishes to make the Work available on an Open Access basis (and intends to pay the relevant APC), the terms of reuse of such Open Access shall be governed by a Creative Commons licence – details of these licences and which [Creative Commons](#) licence will apply to this Work are set out in our licence referred to above.

Other than as permitted in any relevant BMJ Author's Self Archiving Policies, I confirm this Work has not been accepted for publication elsewhere, is not being considered for publication elsewhere and does not duplicate material already published. I confirm all authors consent to publication of this Work and authorise the granting of this licence.

1  
2  
3  
4  
5  
6  
7  
8  
9  
10  
11  
12  
13  
14  
15  
16  
17  
18  
19  
20  
21  
22  
23  
24  
25  
26  
27  
28  
29  
30  
31  
32  
33  
34  
35  
36  
37  
38  
39  
40  
41  
42  
43  
44  
45  
46  
47  
48  
49  
50  
51  
52  
53  
54  
55  
56  
57  
58  
59  
60

1 **A Multicenter Prospective Observational Study Protocol for Radiation Exposure**  
2 **from Gastrointestinal Fluoroscopic Procedures (REX-GI study)**

3  
4 Tsutomu Nishida<sup>1</sup>, Shiro Hayashi<sup>1,2</sup>, Mamoru Takenaka<sup>3</sup>, Makoto Hosono<sup>4</sup>, Hirofumi  
5 Kogure<sup>5</sup>, Kenkei Hasatani<sup>6</sup>, Shinjiro Yamaguchi<sup>7</sup>, Hirotsugu Maruyama<sup>8</sup>, Hisashi  
6 Doyama<sup>9</sup>, Hideyuki Ihara<sup>10</sup>, Toshiyuki Yoshio<sup>11</sup>, Koji Nagaike<sup>12</sup>, Takuya Yamada<sup>13</sup>,  
7 Takayuki Yakushijin<sup>14</sup>, Tadayuki Takagi<sup>15</sup>, Hidetaka Tsumura<sup>16</sup>, Akira Kurita<sup>17</sup>,  
8 Satoshi Asai<sup>18</sup>, Yukiko Ito<sup>19</sup>, Toshio Kuwai<sup>20</sup>, Yasuki Hori<sup>21</sup>, Iruru Maetani<sup>22</sup>, Kenji  
9 Ikezawa<sup>23</sup>, Takuji Iwashita<sup>24</sup>, Kengo Matsumoto<sup>1</sup>, Masami Inada<sup>1</sup>

- 10  
11 1) Department of Gastroenterology, Toyonaka Municipal Hospital, Toyonaka, Osaka,  
12 Japan  
13 2) Department of Gastroenterology and Internal Medicine, Kento Hayashi Clinic,  
14 Suita, Osaka, Japan  
15 3) Department of Gastroenterology and Hepatology, Kindai University, Faculty of  
16 Medicine, Osaka-Sayama, Osaka, Japan  
17 4) Department of Radiology, Kindai University Faculty of Medicine, Osaka-Sayama,  
18 Osaka, Japan  
19 5) Department of Gastroenterology, Graduate School of Medicine, The University of  
20 Tokyo, Tokyo, Japan  
21 6) Department of Gastroenterology, Fukui Prefectural Hospital, Fukui, Fukui, Japan  
22 7) Department of Gastroenterology and Hepatology, Kansai Rosai Hospital,

- 1  
2  
3  
4  
5  
6 23 Amagasaki, Hyogo, Japan  
7  
8  
9 24 8) Department of Gastroenterology, Osaka City University, Graduate School of  
10  
11 25 Medicine, Osaka, Osaka, Japan  
12  
13 26 9) Department of Gastroenterology, Ishikawa Prefectural Central Hospital, Kanazawa,  
14  
15  
16 27 Ishikawa, Japan  
17  
18 28 10) Department of Gastroenterology, Tonan Hospital, Sapporo, Hokkaido, Japan  
19  
20  
21 29 11) Department of Gastroenterology, Cancer Institute Hospital, Japanese Foundation  
22  
23 30 for Cancer Research, Ariake, Tokyo, Japan  
24  
25  
26 31 12) Department of Gastroenterology and Hepatology, Suita Municipal Hospital, Osaka,  
27  
28 32 Japan  
29  
30  
31 33 13) Department of Gastroenterology and Hepatology, Osaka-Rosai Hospital,  
32  
33 34 Sakai, Osaka, Japan  
34  
35  
36 35 14) Department of Gastroenterology and Hepatology, Osaka General Medical Center,  
37  
38 36 Osaka, Osaka, Japan  
39  
40  
41 37 15) Department of Gastroenterology, Fukushima Medical University School of  
42  
43 38 Medicine, Fukushima, Japan  
44  
45  
46 39 16) Department of Gastroenterological Oncology, Hyogo Cancer Center, Akashi, Japan  
47  
48  
49 40 17) Department of Gastroenterology and Hepatology, Digestive Disease Center, Kitano  
50  
51 41 Hospital, Tazuke Kofukai Medical Research Institute, Osaka, Osaka, Japan  
52  
53  
54 42 18) Department of Gastroenterology, Tane General Hospital, Osaka, Osaka, Japan  
55  
56  
57 43 19) Department of Gastroenterology, Japanese Red Cross Medical Center, Tokyo,  
58  
59  
60

1  
2  
3  
4  
5  
6 44 Japan

7  
8 45 20) Department of Gastroenterology, National Hospital Organization, Kure Medical  
9  
10  
11 46 Center and Chugoku Cancer Center, Kure, Japan

12  
13 47 21) Department of Gastroenterology and Metabolism, Nagoya City University Graduate  
14  
15  
16 48 School of Medical Sciences, Nagoya, Japan

17  
18 49 22) Division of Gastroenterology and Hepatology, Department of Internal  
19  
20  
21 50 Medicine, Toho University Ohashi Medical Center, Tokyo, Japan

22  
23 51 23) Department of Hepatobiliary and Pancreatic Oncology, Osaka International Cancer  
24  
25  
26 52 Institute, Osaka, Osaka, Japan

27  
28 53 24) First Department of Internal Medicine, Gifu University Hospital, Gifu, Japan

29  
30  
31 54

32  
33 55 **Address all correspondence to:** Tsutomu Nishida, M.D.

34  
35  
36 56 Department of Gastroenterology, Toyonaka Municipal Hospital

37  
38  
39 57 4-14-1 Shibahara, Toyonaka, Osaka 560-8565 Japan

40  
41  
42 58 Email: [tnishida.gastro@gmail.com](mailto:tnishida.gastro@gmail.com)

43  
44  
45 59 Tel: +81-6-6843-0101

46  
47  
48  
49 60

50  
51 61 **Email addresses:** Tsutomu Nishida: [tnishida.gastro@gmail.com](mailto:tnishida.gastro@gmail.com), Shiro Hayashi:

52  
53 62 [hayashishiro1976@yahoo.co.jp](mailto:hayashishiro1976@yahoo.co.jp), Mamoru Takenaka: [mamoxyo45@gmail.com](mailto:mamoxyo45@gmail.com), Makoto

54  
55 63 Hosono: [hosono@med.kindai.ac.jp](mailto:hosono@med.kindai.ac.jp), Hirofumi Kogure: [kogureh-tyk@umin.ac.jp](mailto:kogureh-tyk@umin.ac.jp), Kenkei

56  
57 64 Hasatani: [hasatani9@yahoo.co.jp](mailto:hasatani9@yahoo.co.jp), Shinjiro Yamaguchi: [smay-0608@diary.ocn.ne.jp](mailto:smay-0608@diary.ocn.ne.jp),  
58  
59  
60

1  
2  
3  
4  
5  
6 65 Hirotsugu Maruyama: [hiromaruyama99@gmail.com](mailto:hiromaruyama99@gmail.com), Hisashi Doyama:  
7  
8 66 [doyama.134@gmail.com](mailto:doyama.134@gmail.com), Hideyuki Ihara: [h-ihara@tonan.gr.jp](mailto:h-ihara@tonan.gr.jp), Toshiyuki Yoshio:  
9  
10 67 [toshiyuki.yoshio@jfc.or.jp](mailto:toshiyuki.yoshio@jfc.or.jp), Koji Nagaike: [nagaike.koji@gmail.com](mailto:nagaike.koji@gmail.com), Takuya Yamada:  
11  
12 68 [yamtak1973@gmail.com](mailto:yamtak1973@gmail.com), Takayuki Yakushijin: [yakushijin@gh.opho.jp](mailto:yakushijin@gh.opho.jp), Tadayuki  
13  
14 69 Takagi: [daccho@fmu.ac.jp](mailto:daccho@fmu.ac.jp), Hidetaka Tsumura: [h.tsumura@hp.pref.hyogo.jp](mailto:h.tsumura@hp.pref.hyogo.jp), Akira  
15  
16 70 Kurita: [kuritaaki1976@gmail.com](mailto:kuritaaki1976@gmail.com), Satoshi Asai: [bonyaritetsu1226@hotmail.co.jp](mailto:bonyaritetsu1226@hotmail.co.jp),  
17  
18 71 Yukiko Ito: [yukikomd1224@gmail.com](mailto:yukikomd1224@gmail.com), Toshio Kuwai: [toshiokuwai@gmail.com](mailto:toshiokuwai@gmail.com),  
19  
20 72 Yasuki Hori: [yhori@med.nagoya-cu.ac.jp](mailto:yhori@med.nagoya-cu.ac.jp), Iruru Maetani: [u.ac.jp](mailto:mtnir50637@med.toho-<br/>21<br/>22 u.ac.jp), Kenji Ikezawa: [ikezawa-ke@mc.pref.osaka.jp](mailto:ikezawa-ke@mc.pref.osaka.jp), Takuji Iwashita:  
23  
24 73 [takuji@w7.dion.ne.jp](mailto:takuji@w7.dion.ne.jp), Kengo Matsumoto: [ken5@gh.med.osaka-u.ac.jp](mailto:ken5@gh.med.osaka-u.ac.jp), Masami Inada:  
25  
26 74  
27  
28  
29  
30 75 [inada-intoyo@chp.toyonaka.osaka.jp](mailto:inada-intoyo@chp.toyonaka.osaka.jp)  
31  
32  
33  
34  
35

36 77 **Word count:** 2804 words  
37  
38  
39  
40

41 79 **Keywords:** Radiation Exposure, Diagnostic Reference Levels, ERCP, Gastrointestinal  
42  
43 80 Fluoroscopic Procedure, Endoscopy.  
44  
45  
46  
47  
48  
49  
50  
51  
52  
53  
54  
55  
56  
57  
58  
59  
60



1  
2  
3  
4  
5  
6 **82 ABSTRACT**

7  
8 **83 INTRODUCTION:** Recently, the use of various endoscopic procedures under X-ray  
9  
10  
11 **84** fluoroscopic guidance, such as endoscopic retrograde cholangiopancreatography  
12  
13 **85** (ERCP), interventional endoscopic ultrasonography (EUS), enteral endoscopy, and  
14  
15  
16 **86** stenting, has been rapidly increasing because of the minimally invasive nature of these  
17  
18 **87** procedures compared to that of surgical intervention. With the spread of computed  
19  
20  
21 **88** tomography and fluoroscopic interventions, including endoscopic procedures under X-  
22  
23  
24 **89** ray guidance, high levels of radiation exposure (RE) from medical imaging have led to  
25  
26 **90** major concerns throughout society. However, information about RE related to these  
27  
28 **91** image-guided procedures in gastrointestinal endoscopy is scarce, and the RE  
29  
30  
31 **92** reference levels have not been established. The aim of this study is to prospectively  
32  
33  
34 **93** collect the actual RE dose and to help establish diagnostic reference levels (DRLs) in  
35  
36 **94** the field of gastroenterology in Japan.

37  
38 **95 METHODS AND ANALYSIS:** This study is a multicenter, prospective observational  
39  
40  
41 **96** study that is being conducted to collect the actual RE from treatments and diagnostic  
42  
43  
44 **97** procedures, including ERCP, interventional EUS, balloon-assisted enteroscopy, enteral  
45  
46 **98** metallic stent placement and enteral tube placement. We will measure the total  
47  
48 **99** fluoroscopy time (FT, min), the total dose-area product (DAP, Gy $\text{cm}^2$ ) and air-kerma  
49  
50  
51 **100** (AK, mGy) of those procedures. Because we are collecting the actual RE data and  
52  
53  
54 **101** identifying the influential factors through a prospective, nationwide design, this study  
55  
56 **102** will provided guidance regarding the DRLs of ERCP, interventional EUS, balloon-  
57  
58 **103** assisted enteroscopy, enteral metallic stent placement and enteral tube placement.  
59  
60

1  
2  
3  
4  
5  
6 104 **ETHICS AND DISSEMINATION:** This trial (Radiation EXposure from GastroIntestinal  
7  
8  
9 105 fluoroscopic procedures: REX-GI study) was registered with the UMIN Clinical Trials  
10  
11 106 Registry at <http://www.umin.ac.jp/ctr/> under number UMIN000036525 (registered 1  
12  
13  
14 107 May 2019). Approval was obtained from the Institutional Review Board of Toyonaka  
15  
16 108 Municipal Hospital (2019-02-04). The need for informed consent will be waived via the  
17  
18 109 *opt-out* method of each hospital website.  
19  
20

21 110

22  
23 111  
24  
25  
26  
27  
28  
29  
30  
31  
32  
33  
34  
35  
36  
37  
38  
39  
40  
41  
42  
43  
44  
45  
46  
47  
48  
49  
50  
51  
52  
53  
54  
55  
56  
57  
58  
59  
60

1  
2  
3  
4  
5  
6 112 **Strengths and limitations of this study**  
7

8 113 • The large, multicenter, nationwide dataset of radiation exposure doses for  
9  
10 114 gastrointestinal fluoroscopic procedures in gastrointestinal endoscopy gathered in  
11  
12 115 this study will serve as a basis for the development of diagnostic reference levels in  
13  
14 116 Japan.  
15  
16

17  
18 117 • Gastrointestinal fluoroscopic procedures have been rapidly increasing in number  
19  
20 118 and complexity, but there are still not enough available local and national DRLs in  
21  
22 119 gastrointestinal endoscopy units.  
23  
24

25  
26 120 • These data may not be valid for old models of fluoroscopic systems because this  
27  
28 121 study will include data from fluoroscopic systems with available radiation data.  
29  
30

31 122  
32  
33  
34  
35  
36  
37  
38  
39  
40  
41  
42  
43  
44  
45  
46  
47  
48  
49  
50  
51  
52  
53  
54  
55  
56  
57  
58  
59  
60

## 123 INTRODUCTION

124 Medical radiation is widely used in both medical imaging and radiation treatment. In  
125 medical imaging, fluoroscopy employs radiation to show a continuous X-ray image on a  
126 monitor and plays a major role in the daily practices of gastroenterology, digestive  
127 endoscopy, and hepatobiliary and pancreatic studies. Radiological medical imaging  
128 has both benefits and drawbacks for patients. The latter is split into two types:  
129 deterministic risks <sup>1</sup>, determined by the threshold dose, as represented by skin injury,  
130 and stochastic risks, determined by a linear no-threshold model, such as the cancer  
131 risk <sup>2</sup>. There have been some reports on radiation-induced skin injury in cardiology and  
132 interventional radiology (IVR) <sup>3</sup>, but reports from gastrointestinal endoscopy units are  
133 rare. However, all medical staff in gastrointestinal endoscopy units need to have  
134 correct knowledge of the appropriate use of medical radiation. Historically, the use of  
135 medical radiation has rapidly increased since the 1990s with the spread of computed  
136 tomography (CT), and the radiation-associated cancer risk was recognized in the same  
137 period, even when the doses of radiation were small <sup>4 5 6</sup>. In particular, the use of CT  
138 has increased approximately 12-fold in the United Kingdom and more than 20-fold in  
139 the United States in the last 25 years <sup>7</sup>.

140 The International Atomic Energy Agency (IAEA), the International Commission on  
141 Radiological Protection (ICRP), the United Nations Scientific Committee on the Effects  
142 of Atomic Radiation (UNSCEAR), and other radiological societies have been  
143 attempting to manage medical radiation exposure (RE) according to the “as low as  
144 reasonably achievable” (ALARA) principle by establishing diagnostic reference levels

1  
2  
3  
4  
5  
6 145 (DRLs) to optimize protection from medical radiation. The concept of DRLs was first  
7  
8 146 introduced by the ICRP 73 <sup>8</sup> in 1996. Then, the ICRP emphasized the important role of  
9  
10  
11 147 DRLs as a tool for optimizing patient protection <sup>9 10</sup>. Accordingly, the ICRP set specific  
12  
13  
14 148 target levels for various X-ray-related procedures in 2007 <sup>9</sup>. This movement of setting  
15  
16 149 DRLs has been led by radiation-related societies in each region, although the  
17  
18 150 movement has mainly been driven by Western countries. The ICRP 135 recommends  
19  
20  
21 151 that all individuals who are involved in patient procedures with the risk of medical  
22  
23  
24 152 exposure should be familiar with the DRL process as a tool for optimizing protection <sup>11</sup>.  
25  
26 153 DRLs are now widely accepted in not only Western countries but also Japan (Japan  
27  
28 154 DRLs 2015) <sup>12</sup>, and DRLs have become the global standard for all procedures that use  
29  
30  
31 155 ionizing radiation. Legislation has made it mandatory to establish and record DRLs in  
32  
33  
34 156 Europe, but that is not the case worldwide. The introduction of DRLs in the UK  
35  
36 157 achieved a reduction of approximately 50% in the radiation dose in typical X-ray  
37  
38 158 examinations over 15 years <sup>13</sup>. However, there is still not enough available data on RE  
39  
40  
41 159 for gastrointestinal fluoroscopic procedures, such as endoscopic retrograde  
42  
43  
44 160 cholangiopancreatography (ERCP), interventional endoscopic ultrasonography (EUS),  
45  
46 161 small bowel endoscopy, and enteral stent placement; these techniques are still being  
47  
48 162 developed and have recently been used with increasing frequency <sup>14-16</sup>.  
49  
50  
51  
52 163 Our gastroenterologists and endoscopists are still unfamiliar with the DRL concept.  
53  
54 164 Among the guidelines developed by gastrointestinal endoscopy associations, the 2012  
55  
56  
57 165 European Gastrointestinal Endoscopy Society (ESGE) guidelines for radiation  
58  
59  
60

1  
2  
3  
4  
5  
6 166 protection state that the entrance skin dose (ESD; approximately equivalent to air-  
7  
8 167 kerma in this study) and kerma-area product (KAP; approximately equivalent to the  
9  
10 168 dose-area product (DAP) in this study) during diagnostic and therapeutic ERCP are 55-  
11  
12 169 347 mGy and 3-115/8-333 Gy $\text{cm}^2$ , respectively, although information regarding the  
13  
14 170 DRLs of ERCP is limited because this statement is based on only approximately 600  
15  
16 171 cases of ERCP in 7 reports <sup>14</sup>. No guidelines on RE from the American Society for  
17  
18 172 Gastrointestinal Endoscopy (ASGE) exist, but the ASGE recommends measuring and  
19  
20 173 documenting fluoroscopy time (FT) and radiation dose in all ERCP procedures as a  
21  
22 174 quality indicator (level of evidence: 2C) <sup>17</sup>. Although no guidelines for exposure have  
23  
24 175 been developed by the Japan Gastroenterological Endoscopy Society (JGES), a  
25  
26 176 description of FT exists in the item regarding ERCP in the Japan Endoscopy Database  
27  
28 177 (JED) <sup>18</sup>, which is scheduled to be implemented as a nationwide endoscopic survey in  
29  
30 178 2020.

31  
32  
33  
34  
35  
36  
37  
38  
39 179 Recently, various endoscopic procedures performed under fluoroscopic guidance are  
40  
41 180 rapidly increasing in popularity in gastrointestinal endoscopy units, where the aim is not  
42  
43 181 only diagnosis but also therapeutic intervention. The ICRP recommends that DRLs  
44  
45 182 should be used to manage patient doses during both diagnostic and interventional  
46  
47 183 procedures. There is difficulty in applying the DRL concept to interventional procedures  
48  
49 184 because the RE level depends on the complexity of the procedure and the individual  
50  
51 185 clinical circumstances <sup>10 19 20</sup>. There have been attempts to establish DRLs for IVR  
52  
53  
54  
55  
56  
57  
58  
59  
60

1  
2  
3  
4  
5  
6 186 procedures, where grouping by disease site may help minimize the wide distribution of  
7  
8 187 RE <sup>21 22</sup>.  
9  
10  
11  
12 188 The Japanese DRLs were established on a basis of a survey and released in 2015;  
13  
14 189 these guidelines defined the DRL value for fluoroscopically guided interventional  
15  
16 190 procedures as a fluoroscopic radiation dose rate (interventional reference point dose  
17  
18 191 rate) of 20 mGy/min <sup>12</sup>. However, it did not include information for specific procedures  
19  
20 192 in the field of gastroenterology <sup>12</sup>. Therefore, we aim to prospectively collect actual RE  
21  
22 193 data and identify the influential factors, such as disease site, in this REX-GI study and  
23  
24 194 to establish DRLs for the following interventional procedures in gastrointestinal  
25  
26 195 endoscopy units: ERCP, interventional EUS, balloon-assisted enteroscopy, enteral  
27  
28 196 metallic stent placement and enteral tube placement.  
29  
30  
31  
32  
33  
34  
35  
36  
37  
38  
39  
40  
41  
42  
43  
44  
45  
46  
47  
48  
49  
50  
51  
52  
53  
54  
55  
56  
57  
58  
59  
60

1  
2  
3  
4  
5  
6 197 **METHODS AND ANALYSIS**  
7

8 198 **Aims**  
9

10  
11 199 The primary aim of this nationwide, prospective study is to collect actual data on RE  
12  
13 200 and identify the factors affecting RE during treatments and diagnostic procedures  
14  
15  
16 201 under different types of fluoroscopic guidance for gastroenterology procedures,  
17  
18 202 including the gastrointestinal, hepatobiliary and pancreatic fields, to serve as a basis  
19  
20  
21 203 for the establishment of DRLs in Japan.  
22

23  
24 204

25  
26 205 **Design**  
27

28 206 This is a multicenter, prospective observational cohort study of consecutive patients  
29  
30  
31 207 undergoing the following 5 treatments and diagnostic procedures under fluoroscopic  
32  
33 208 guidance in the field of gastroenterology: 1) ERCP, 2) interventional EUS, 3) balloon-  
34  
35 209 assisted enteroscopy, 4) enteral metallic stent placement; and 5) enteral tube  
36  
37 210 placement. We will examine the procedure time (min), total FT (min), AK (mGy), DAP  
38  
39 211 (Gycm<sup>2</sup>), total number of roentgenography procedures, and radiation dose rate (RDR)  
40  
41 212 (mGy/min) during the procedures. The participating clinicians will manage patients  
42  
43 213 according to the usual clinical practice, and the patients will undergo the above 5  
44  
45 214 procedures. For the analysis, all data, including the related variables and outcome data  
46  
47 215 (Tables 1 and 2), will be collected for all patients. The study (Radiation EXposure from  
48  
49 216 GastroIntestinal fluoroscopic procedures: REX-GI study) was registered with the UMIN  
50  
51 217 Clinical Trials Registry at <http://www.umin.ac.jp/ctr/> under the number UMIN000036525  
52  
53 218 (registered 1 May 2019).  
54  
55  
56  
57  
58  
59  
60



219

**220 Setting**

221 The study will be conducted at 7 university hospitals, 4 cancer centers, 9 general  
222 hospitals and 2 municipal hospitals in Japan. The participating hospitals are Toyonaka  
223 Municipal Hospital, Kindai University, the University of Tokyo, Fukui Prefectural  
224 Hospital, Kansai Rosai Hospital, Osaka City University, Ishikawa Prefectural Central  
225 Hospital, Tonan Hospital, Japanese Foundation for Cancer Research, Suita Municipal  
226 Hospital, Osaka Rosai Hospital, Osaka General Medical Center, Fukushima Medical  
227 University School of Medicine, Hyogo Cancer Center, Kitano Hospital, Tane General  
228 Hospital, Japanese Red Cross Medical Center, Kure Medical Center and Chugoku  
229 Cancer Center, Nagoya City University Hospital, Toho University Ohashi Medical  
230 Center, Osaka International Cancer Institute, and Gifu University Hospital (Figure 1).  
231 Table 1 shows the fluoroscopic systems and units performing procedures under  
232 fluoroscopic guidance in each institution. The central sites of the study are located at  
233 the Toyonaka Municipal Hospital and Kindai University. The participating physicians  
234 are gastroenterologists or endoscopists, including all experts and trainees working at  
235 all involved hospitals. The quality of the fluoroscopic devices will be regularly monitored  
236 according to the procedures in each institution.

237

**238 Study population**

239 We will include all patients receiving usual clinical care who undergo the following  
240 treatments and diagnostic procedures under fluoroscopic guidance: 1) ERCP; 2)

1  
2  
3  
4  
5  
6 241 interventional EUS; 3) balloon-assisted enteroscopy; 4) enteral metallic stent  
7  
8 242 placement; and 5) enteral tube placement. There is no age restriction. We will exclude  
9  
10 243 patients who do not want to participate in this study via the *opt-out* method on each  
11  
12 244 hospital website and patients who the attending physicians judge to be unsuitable for  
13  
14 245 inclusion in this study.  
15  
16  
17  
18  
19  
20

246

### 247 **Primary outcomes**

248 The primary outcomes will be the total FT (min), RDR (mGy/min), dose-area  
249 parameters (AK (mGy) and DAP (Gycm<sup>2</sup>) and the total number of imaging studies that  
250 the patients who meet the individual inclusion and exclusion criteria will undergo (Table  
251 2).

252

### 253 **Secondary outcome**

254 The secondary outcome will be the RE-related factors that affect the radiation dose in  
255 each procedure. The details are shown in Table 3.

256

### 257 **Setting the sample size**

258 According to the preliminary questionnaire survey (data not shown), the numbers of  
259 examinations per year in the 8 centers that plan to participate in March 2019 are as  
260 follows: 4000 ERCP procedures, 125 EUS procedures, 320 small intestine endoscopy  
261 procedures, 44 esophageal stent placements, 150 gastroduodenal stent placements,  
262 75 colorectal stent placements, 180 transanal ileus tube placements, and 75 ileus tube

1  
2  
3  
4  
5  
6 263 placements. The ICRP 135 recommends using data from 20-30 facilities to set national  
7  
8 264 DRLs, and a survey for a particular examination in a facility should usually involve the  
9  
10  
11 265 collection of data from at least 20 patients <sup>11</sup>.

12  
13 266 To set the DRLs and to reduce intraprocedural variability in each hospital, we set the  
14  
15  
16 267 minimum sample size to at least 400 patients for each procedure. We believe that  
17  
18 268 initially enrolling a high number of facilities and patients is desirable; therefore, we did  
19  
20  
21 269 not set an upper limit for the goals.

22  
23  
24 270

#### 25 26 271 **Data analysis plan**

27  
28 272 After obtaining the data, we will perform normality tests. Continuous variables will be  
29  
30  
31 273 expressed as medians with interquartile ranges or means with standard deviations.

32  
33 274 The categorical variables will be expressed as numbers in each category or as  
34  
35  
36 275 frequencies. To explore surrogate markers of RD, simple linear regression analysis will  
37  
38 276 be performed to identify the relationships between procedure time, FT and RD. A  
39  
40  
41 277 multiple linear regression analysis will be performed to identify the factors related to  
42  
43 278 RD. A P value of 0.05 will be considered statistically significant. All statistical analyses  
44  
45  
46 279 will be performed with JMP software (SAS Institute, Inc., Cary, NC, USA).

47  
48  
49 280

#### 50 51 281 **Patient and public involvement**

52  
53 282 Clinical factors related to ERCP and interventional EUS have been retrospectively  
54  
55  
56 283 collected at two sites (Toyonaka Municipal Hospital and Kindai University) <sup>21 23-25</sup> . We  
57  
58 284 used those published data to develop plans for the design or implementation of the  
59  
60

1  
2  
3  
4  
5  
6 285 study and to determine the research question or the outcome measures. No patients  
7  
8 286 were asked to advise us on the interpretation or writing up of results. There are no  
9  
10 287 plans to disseminate the results of the research to study participants, but we will  
11  
12 288 consider disseminating the results of the research to the relevant patient community.  
13  
14  
15

16 289

### 18 290 **Data collection**

21 291 The clinical factors have been modified to comply with local patient flow and  
22  
23 292 administrative requirements and have been assessed and approved by the study  
24  
25 293 steering committee. We are collecting the password-protected case report forms by e-  
26  
27 294 mail from each institution; these will be de-identified after all data have been collected,  
28  
29 295 and all data queries have been addressed. A unique study identification number will  
30  
31 296 identify each participant and the associated clinical data. Data collection will be  
32  
33 297 performed at 3-month intervals to prevent data loss. Data analysis will take place at the  
34  
35 298 central study site (Kindai University). This study does not require data monitoring due  
36  
37 299 to its nature as an observational study without interventions. Data will be retained for  
38  
39 300 either a minimum of 5 years after the end of the study or for 10 years after publication,  
40  
41 301 whichever is later.  
42  
43  
44  
45  
46  
47  
48  
49

50 302

### 52 303 **Patient recruitment and time plan**

54 304 Patient recruitment will be carried out at the participating hospitals from May 2019 -  
55  
56 305 December 2020.  
57  
58  
59  
60

1  
2  
3  
4  
5  
6 306 2021: Data analysis and writing and submission of the main manuscript for publication.  
7

8  
9 307

10  
11 308 **Ethics and dissemination**

12  
13 309 This observational study will be conducted in accordance with the principles of the  
14  
15  
16 310 Declaration of Helsinki, and approval has been obtained from the Institutional Review  
17  
18 311 Board of Toyonaka Municipal Hospital (2019-02-04) and the institutional review board  
19  
20  
21 312 of each participating facility. The need for informed consent will be waived via the *opt-*  
22  
23 313 *out* method on each hospital website. The results of this study will be presented at  
24  
25  
26 314 gastroenterology-, endoscopy-, or radiology-related congresses and will be published  
27  
28 315 in a peer-reviewed journal.  
29

30  
31 316

32  
33 317

34  
35  
36 318 **Author contributions**

37  
38  
39 319 Nishida T, Hayashi S (Toyonaka Municipal Hospital), and Takenaka M (Kindai  
40  
41  
42 320 University) designed this study. Hosono M (Kindai University) critically reviewed the  
43  
44 321 protocol. Nishida T, Hayashi S (Toyonaka Municipal Hospital), Takenaka M (Kindai  
45  
46  
47 322 University), Kogure H (The University of Tokyo), Hasatani K (Fukui Prefectural  
48  
49 323 Hospital), Yamaguchi S (Kansai Rosai Hospital), Maruyama H (Osaka City University),  
50  
51  
52 324 Doyama H (Ishikawa Prefectural Central Hospita), Ihara H, (Tonan Hospital) Yoshio T  
53  
54  
55 325 (Cancer Institute Hospital, Japanese Foundation for Cancer Research), Nagaike K  
56  
57 326 (Suita Municipal Hospital), Yamada T (Osaka-Rosai Hospital), Yakushijin T (Osaka  
58  
59  
60

1  
2  
3  
4  
5  
6 327 General Medical Center), Takagi T (Fukushima Medical University School of Medicine),  
7  
8 328 Tsumura H (Hyogo Cancer Center), Kurita A ( Kitano Hospital), Asai S (Tane General  
9  
10 329 Hospital), Ito Y (Japanese Red Cross Medical Center), Kuwai T (National Hospital  
11  
12 330 Organization, Kure Medical Center and Chugoku Cancer Center), Hori Y (Nagoya City  
13  
14 331 University Graduate School of Medical Sciences), Maetani I (Toho University Ohashi  
15  
16 332 Medical Center), Ikezawa K (Osaka International Cancer Institute), Iwashita T (Gifu  
17  
18 333 University Hospital), Matsumoto K, and Inada M (Toyonaka Municipal Hospital)  
19  
20  
21 334 participated this study and will recruit the patients. All authors accepted the final  
22  
23  
24 335 version of the protocol (ver. 1.1: 2019-Mar-14, ver.1.5: 2019-July-15).  
25  
26  
27  
28  
29  
30  
31

336

### 337 **Acknowledgements and collaborators**

338 We thank all the collaborators who are cooperating in this first nationwide study of the  
339 Radiation Exposure from Gastrointestinal Fluoroscopic Procedures in Japan (REX-GI).  
340 The collaborators involved in the REX-GI study are as follows: Mitsuhiro Fujishiro  
341 (Nagoya University Graduate School of Medicine), Masashi Yamamoto, Dai  
342 Nakamatsu, Kaori Mukai, Kei Takahashi, Aya Sugimoto, Naoto Osugi, Yu Higaki, Ryo  
343 Tomita, Tatsuya Sakamoto, Emi Meren, Kazuki Aochi, Shinji Kuriki, Li-sa Chang, and  
344 Koji Fukui (Toyonaka Municipal Hospital), Yousuke Nakai (The University of Tokyo),  
345 Takahiro Suda (Kansai Rosai Hospital), Kazuhiro Matsunaga (Ishikawa Prefectural  
346 Central Hospital), Tetsuya Sumiyoshi (Tonan Hospital), Takashi Sasaki, Atsuko  
347 Tamashiro, Hiroyuki Hatamori (Cancer Institute Hospital, Japanese Foundation for

1  
2  
3  
4  
5  
6 348 Cancer Research), Takumi Kanagawa, Yuichi Yoshida, Masafumi Naito (Suita  
7  
8 349 Municipal Hospital), Shuji Ishii (Osaka General Medical Center), Takuto Hikichi  
9  
10 350 (Fukushima Medical University School of Medicine), Naoki Fujimoto (Tane General  
11  
12  
13 351 Hospital), Ikuya Miki (Hyogo Cancer Center), Yuzuru Tamaru (National Hospital  
14  
15  
16 352 Organization Kure Medical Center and Chugoku Cancer Center), Hiromi Kataoka,  
17  
18 353 Kazuki Hayashi (Nagoya City University Graduate School of Medical Sciences), and  
19  
20  
21 354 Hiroaki Shigoka (Toho University Ohashi Medical Center).  
22

23 355

#### 26 356 **Funding statement**

27  
28 357 This research received no specific grants from any funding agency in the public,  
29  
30  
31 358 commercial or not-for-profit sectors.  
32

33 359

#### 37 360 **Publication and data sharing**

38  
39  
40 361 After completion of the study, a main manuscript will be prepared to present the results  
41  
42 362 and will be submitted to a clinical journal for peer review. This study will ensure that the  
43  
44 363 public has access to the published data. A file containing the clean dataset used for the  
45  
46 364 final analysis to determine the main data of the study and an explanation of the  
47  
48 365 variables will be made publicly accessible in an anonymized format.  
49

50 366

#### 55 367 **Consent for publication**

1  
2  
3  
4  
5  
6 368 The principal investigators will form a publication committee, which will include key  
7  
8 369 members of this study, and the committee will grant authorship according to individual  
9  
10 370 input. Investigators who do not qualify for authorship will be acknowledged by name in  
11  
12  
13 371 the final manuscript.  
14  
15  
16  
17  
18 372  
19  
20  
21 373 **Conflicts of interest statement**  
22  
23  
24  
25 374 None of the authors have any competing interests related to this research.  
26  
27  
28  
29  
30  
31  
32  
33  
34  
35  
36  
37  
38  
39  
40  
41  
42  
43  
44  
45  
46  
47  
48  
49  
50  
51  
52  
53  
54  
55  
56  
57  
58  
59  
60



1  
2  
3  
4  
5  
6 **376 Discussion**  
7

8  
9 377 Currently, the establishment of DRLs is an international requirement for protection from  
10  
11 378 medical radiation. For diagnostic radiology, national and regional DRLs are usually set  
12  
13 379 at the 75% percentile of the distribution of a typical sample dose <sup>26</sup>. All physicians or  
14  
15  
16 380 medical staff who are involved in radiological imaging or procedures under fluoroscopic  
17  
18 381 guidance should be familiar with the DRL process as a tool for optimizing protection. In  
19  
20 382 addition, separate DRLs must be established for each country and/or region because  
21  
22  
23 383 the equipment and procedure protocols can vary among different regions <sup>26</sup>. However,  
24  
25  
26 384 the amount of RE depends on the procedure complexity, patient anatomy, lesion  
27  
28 385 characteristics, disease severity <sup>11</sup> and type of fluoroscopic devices <sup>21</sup>; thus, setting the  
29  
30 386 upper limit of radiation use by applying uniform standards is difficult. Generally, DRLs  
31  
32  
33 387 are not dose limits and do not help distinguish between good and poor medical  
34  
35  
36 388 practices <sup>26</sup>. Therefore, a high demand exists for a large amount of real-world evidence.  
37  
38  
39 389 The 2015 Japan DRLs state that the methods for establishing DRLs not only include  
40  
41 390 setting radiation dose levels but also includes determining the dose quantities and units  
42  
43  
44 391 used to set the DRLs, thus standardizing the methodology for dose measurements,  
45  
46 392 data collection and identification of the applications of DRLs <sup>12</sup>.  
47  
48  
49 393 Unfortunately, most gastroenterologists are unfamiliar with not only DRLs but also  
50  
51 394 radiation protection because information on RE from gastrointestinal medical treatment  
52  
53 395 is currently very scarce, and few RE standards, including DRLs, have been established  
54  
55  
56 396 worldwide. Given this background, the REX-GI study is planned as an observational,  
57  
58  
59 397 nationwide study in Japan. Our results will help to promote radiation optimization and  
60

1  
2  
3  
4  
5  
6 398 patient radiation protection in gastroenterology studies, such as digestive endoscopy,  
7  
8  
9 399 and hepatobiliary and pancreatic procedures.  
10  
11  
12  
13  
14  
15  
16  
17  
18  
19  
20  
21  
22  
23  
24  
25  
26  
27  
28  
29  
30  
31  
32  
33  
34  
35  
36  
37  
38  
39  
40  
41  
42  
43  
44  
45  
46  
47  
48  
49  
50  
51  
52  
53  
54  
55  
56  
57  
58  
59  
60

For peer review only

Table 1. Fluoroscopic system and units performing procedures under fluoroscopic guidance

|                                       | Number of Hospital Beds | Fluoroscopy Device |                 |                |                      | Fluoroscopy Unit |
|---------------------------------------|-------------------------|--------------------|-----------------|----------------|----------------------|------------------|
|                                       |                         | Company            | Device model    | Apparatus type | Year of introduction | Location         |
| Toyonaka Municipal Hospital           | 613                     | Hitachi            | Exavista        | Over-tube      | 2016                 | Endoscopy        |
| Kindai University                     | 929                     | Hitachi            | Curevista       | Over-tube      | 2017                 | Endoscopy        |
| The University of Tokyo               | 1216                    | Hitachi            | Curevista       | Over-tube      | 2009                 | Radiology        |
|                                       |                         | Canon Toshiba      | Exavista        | Over-tube      | 2013                 |                  |
|                                       |                         | Canon Toshiba      | Ultimax-I       | Under-tube     | 2016                 |                  |
| Fukui Prefectural Hospital            | 880                     | Hitachi            | Versiflex       | Over-tube      | 2008                 | Endoscopy        |
| Kansai Rosai Hospital                 | 642                     | Canon Toshiba      | Zexira          | Over-tube      | 2011                 | Radiology        |
|                                       |                         | Canon Toshiba      | Ultimax-I       | Under-tube     | 2017                 |                  |
| Osaka City University                 | 891                     | Hitachi            | Curevista       | Over-tube      | 2011                 | Endoscopy        |
|                                       |                         | Hitachi            | Versiflex vista | Under-tube     | 2015                 | Endoscopy        |
| Ishikawa Prefectural Central Hospital | 639                     | Canon Toshiba      | Drex-zx80       | Over-tube      | 2016                 | Endoscopy        |
| Tonan Hospital                        | 283                     | Hitachi            | Curevista       | Over-tube      | 2013                 | Radiology        |
|                                       |                         | Canon Toshiba      | ZEXIRA          | Over-tube      | 2016                 |                  |

|                                                    |     |                                |                         |                         |      |           |
|----------------------------------------------------|-----|--------------------------------|-------------------------|-------------------------|------|-----------|
| Japanese Foundation<br>for Cancer Research         | 686 | Canon Toshiba                  | Ultimax-i               | Under-tube              | 2016 | Radiology |
| Suita Municipal Hospital                           | 431 | Hitachi                        | Versiflex               | Under-tube              | 2018 | Endoscopy |
| Osaka Rosai Hospital                               | 678 | Hitachi                        | Exavista                | Under-tube              | 2018 | Radiology |
| Osaka General Medical Center                       | 768 | Hitachi<br>Hitachi             | Curevista,<br>Versiflex | Over-tube               | 2018 | Endoscopy |
| Fukushima Medical University<br>School of Medicine | 778 | Canon Toshiba<br>Canon Toshiba | Zexira<br>FPD1717       | Over-tube               | 2012 | Radiology |
| Hyogo Cancer Center                                | 400 | Hitachi                        | Curevista               | Over-tube               | 2019 | Endoscopy |
| Kitano Hospital                                    | 699 | Hitachi<br>Hitachi             | Versiflex<br>Curevista  | Under-tube<br>Over-tube | 2017 | Endoscopy |
| Tane General Hospital                              | 304 | Hitachi                        | Exavista                | Over-tube               | 2011 | Radiology |
| Japanese Red Cross Medical<br>Center               | 708 | Hitachi                        | Curevista               | Over-tube               | 2016 | Radiology |
| Kure Medical Center and<br>Chugoku Cancer Center   | 700 | Hitachi                        | Exavista                | Over-tube               | 2010 | Endoscopy |
| Nagoya City University Hospital                    | 800 | Canon Toshiba                  | Ultimax-I               | Under-tube              | 2018 | Endoscopy |
| Toho University Ohashi Medical<br>Center           | 319 | Canon Toshiba                  | Ultimax-I               | Under-tube              | 2018 | Radiology |

|                                      |     |               |                 |            |      |           |
|--------------------------------------|-----|---------------|-----------------|------------|------|-----------|
| Osaka International Cancer Institute | 500 | Canon Toshiba | Ultimax-I       | Under-tube | 2017 | Endoscopy |
| Gifu University Hospital             | 606 | Shimadzu      | C-Vision Safire | Under-tube | 2004 | Radiology |

For peer review only

1  
2  
3  
4  
5  
6  
7  
8  
9  
10  
11  
12  
13  
14  
15  
16  
17  
18  
19  
20  
21  
22  
23  
24  
25  
26  
27  
28  
29  
30  
31  
32  
33  
34  
35  
36  
37  
38  
39  
40  
41  
42  
43  
44  
45  
46

Table 2. Primary outcomes

| Factors             | Variables                                                                                                                                                                                                                                                                  |
|---------------------|----------------------------------------------------------------------------------------------------------------------------------------------------------------------------------------------------------------------------------------------------------------------------|
| Patients            | <ul style="list-style-type: none"><li>▪ Procedure type</li><li>▪ Age</li><li>▪ Sex</li></ul>                                                                                                                                                                               |
| Fluoroscopic system | <ul style="list-style-type: none"><li>▪ Fluoroscopic device (company, device model, manufacturing year)</li><li>▪ Basic use setting: frame per second (FPS), radiation field (cm<sup>2</sup>) *</li></ul>                                                                  |
| Radiation exposure  | <ul style="list-style-type: none"><li>▪ Total fluoroscopy time (FT) (min)</li><li>▪ Air-Kerma (AK) (mGy)</li><li>▪ Dose-area product (DAP) (Gycm<sup>2</sup>)</li><li>▪ Total number of roentgenography procedures</li><li>▪ Radiation dose rate (RDR) (mGy/min)</li></ul> |

\*When the setting changes during the procedure, we will record the basic setting.

Table 3. Secondary outcomes

| Procedures | Radiation exposure-related factors                                                                                                                                                                                                                                                                                                                                                                                                                                                                                                                                                                                                                                                                                                                                                                                                                                                                                                                                                                                                                                                                                                                                       |
|------------|--------------------------------------------------------------------------------------------------------------------------------------------------------------------------------------------------------------------------------------------------------------------------------------------------------------------------------------------------------------------------------------------------------------------------------------------------------------------------------------------------------------------------------------------------------------------------------------------------------------------------------------------------------------------------------------------------------------------------------------------------------------------------------------------------------------------------------------------------------------------------------------------------------------------------------------------------------------------------------------------------------------------------------------------------------------------------------------------------------------------------------------------------------------------------|
| ERCP       | <p>(A) Surgically altered gastrointestinal anatomy<br/>Billroth I reconstruction, Billroth II reconstruction, Roux-en-Y reconstruction, pancreaticoduodenectomy</p> <p>(B) Type of endoscope</p> <p>(C) Naïve papilla</p> <p>(D) Indications for ERCP (including suspicion) are classified into the following five categories:</p> <ol style="list-style-type: none"> <li>1) Choledocholithiasis (maximum diameter, number of stones, presence of cholangitis, tube exchange for the above diseases, treatment for choledocholithiasis with or without balloon catheter, basket catheter, crusher, etc.)</li> <li>2) Distant malignant bile duct stricture (papillary tumor, distal cholangiocarcinoma, pancreatic cancer, etc.)</li> <li>3) Proximal malignant bile duct stricture (Hilar cholangiocarcinoma, intrahepatic cholangiocarcinoma, gallbladder cancer, etc.)</li> <li>4) Pancreatic duct examination (pancreas cancer, intraductal papillary mucinous neoplasm, etc.)</li> <li>5) Other diseases apart from those listed above (benign bile duct stricture, pancreatobiliary junction abnormality, etc.)</li> </ol> <p>(E) Total procedure time (min) *</p> |

|                    |                                                                                                                                                                                                                                                                                                                                                                                                                                                                                                                                                                                                                                                                                    |
|--------------------|------------------------------------------------------------------------------------------------------------------------------------------------------------------------------------------------------------------------------------------------------------------------------------------------------------------------------------------------------------------------------------------------------------------------------------------------------------------------------------------------------------------------------------------------------------------------------------------------------------------------------------------------------------------------------------|
|                    | <p>1) Cannulation time</p> <p>2) Treatment time</p> <p>(F) Experience of the high-volume endoscopist (HVE) or low-volume endoscopist: (LVE) †</p> <p>(G) Facility scale: The number of ERCP procedures per year</p> <p>(H) Whether the fluoroscopic operator is inside or outside in the fluoroscopy room</p> <p>(I) Various treatments (endoscopic sphincterotomy, stone treatment, bile duct/pancreatic stent, cytology, biopsy, naïve papilla, cannulation method, contrast agent, intubation time, first-use catheter, large balloon, crusher, drainage area or method, stent type used, cholangioscopy)</p> <p>(J) Sedation: Medication and the depth of the anesthesia ‡</p> |
| Interventional EUS | <p>(A) Indication for interventional EUS (EUS-guided hepaticogastrostomy (HGS)), choledochoduodenostomy (CDS), cyst drainage (CD), antegrade treatment (AG), rendezvous technique (RV), pancreatic duct drainage (PD)</p> <p>(B) Total procedure time‡</p> <p>1) Endoscope insertion time</p> <p>2) Treatment time</p> <p>(C) Facility scale: The number of EUS interventions per year, the number of EUS-guided fine-needle aspiration (FNA) procedures per year</p> <p>(D) Double stenting (presence or absence of duodenal stenosis)</p> <p>(E) Device</p> <p>(F) Scope position</p> <p>(G) Sedation: Medication and the depth of anesthesia</p>                                |



|                                         |                                                                                                                                                                                                                                                                                                                                                                                                                  |
|-----------------------------------------|------------------------------------------------------------------------------------------------------------------------------------------------------------------------------------------------------------------------------------------------------------------------------------------------------------------------------------------------------------------------------------------------------------------|
| <p>Balloon-assisted enteroscopy</p>     | <p>(A) Disease indicating balloon-assisted enteroscopy</p> <ol style="list-style-type: none"> <li>1) Hemostatic or bleeding confirmation</li> <li>2) Crohn's disease</li> <li>3) Small intestine tumor examination</li> <li>4) Others</li> </ol> <p>(B) Insertion site: perioral or transanal</p> <p>(C) Insertion length (cm)</p> <p>(D) Total procedure time (min)</p>                                         |
| <p>Enteral metallic stent placement</p> | <p>(A) Stent location</p> <ol style="list-style-type: none"> <li>1) Esophagus (Upper/Mid-Low/Trans)</li> <li>2) Gastro-duodenum (Above pylorus/Trans pylorus /Below pylorus)</li> <li>3) Colon stent (Right/Left/Rectum)</li> </ol> <p>(B) Total procedure time (min) §</p> <ol style="list-style-type: none"> <li>1) Endoscope insertion time</li> <li>2) Treatment time</li> </ol>                             |
| <p>Enteral ileus tube placement</p>     | <p>(A) Disease indicating ileus tube</p> <p>(B) Intranasal ileus tube insertion for ileal obstruction or transanal ileus tube insertion for malignant colonic obstruction</p> <ol style="list-style-type: none"> <li>1) Tube insertion length for peroral ileus tube placement (cm)</li> <li>2) The occlusion site for the transanal tube (Right/Left/Rectum)</li> </ol> <p>(D) Total procedure time (min) §</p> |

1  
2  
3  
4  
5 ERCP: endoscopic retrograde cholangiopancreatography

6 \* Cannulation time is defined as the time from endoscope insertion until successful biliary cannulation, and treatment time is defined as  
7 the time from successful biliary cannulation until the scope is removed from the patient. The total procedure time is defined as the time  
8 from endoscope insertion until the scope is removed from the patient (cannulation time +treatment time).  
9

10 ‡ Depth of anesthesia is divided into 3 levels based on the Richmond Agitation-Sedation Scale (RASS), Ramsay Scale, and Sedation-  
11 Agitation Scale (SAS): good, poor, and very bad. The good level is defined as RASS score: -5 ~ -1, SAS score: 1 ~ 3, and Ramsay  
12 score: 3 ~ 6 equivalent, without additional unplanned doses. The poor level is defined as RASS score: 0 ~ + 1, SAS score: 4 ~ 5, and  
13 Ramsay score: 1 ~ 2, without physical restraint but with unplanned doses. The very bad level is defined as requiring physical restraint  
14 with a force considered dangerous, RASS score: +2 to +4, and SAS score: 6 to 7 regardless of Ramsay score.  
15

16 † HVE: Endoscopists with more than 200 ERCP results and who have been involved in ERCP for over 10 years. LVE: Non-HVE  
17 endoscopists who perform ERCP.  
18

19 ‡ Endoscope insertion time is defined as the time from endoscope insertion until the initial EUS-guided needle puncture, and treatment  
20 time is defined as the time from initial EUS-guided needle puncture until the scope is removed from the patient. The total procedure  
21 time is defined as the time from endoscope insertion until the scope is removed from the patient (endoscope insertion time +treatment  
22 time).  
23

24 ‡ Endoscope insertion time is defined as the time from endoscope insertion until initial guidewire exploration, and treatment time is  
25 defined as the time from initial guidewire exploration until the scope is removed from the patient. The total procedure time is defined as  
26 the time from endoscope insertion until the scope is removed from the patient (endoscope insertion time +treatment time).  
27  
28  
29  
30  
31  
32  
33  
34  
35  
36  
37  
38  
39  
40  
41  
42  
43  
44  
45  
46

1  
2  
3  
4  
5  
6 **Figure legends**  
7

8 **Figure 1.** The participating hospitals in this study.  
9  
10  
11  
12  
13  
14  
15  
16  
17  
18  
19  
20  
21  
22  
23  
24  
25  
26  
27  
28  
29  
30  
31  
32  
33  
34  
35  
36  
37  
38  
39  
40  
41  
42  
43  
44  
45  
46  
47  
48  
49  
50  
51  
52  
53  
54  
55  
56  
57  
58  
59  
60

For peer review only

## References

1. Henry MF, Maender JL, Shen Y, et al. Fluoroscopy-induced chronic radiation dermatitis: a report of three cases. *Dermatol Online J* 2009;15(1):3. [published Online First: 2009/03/14]
2. NCRP Commentary No. 27: Implications of Recent Epidemiologic Studies for the Linear-Nonthreshold Model and Radiation Protection 2018 [Available from: [https://ncrponline.org/wp-content/themes/ncrp/Pub\\_announcements/Commentary\\_No27\\_overview.pdf](https://ncrponline.org/wp-content/themes/ncrp/Pub_announcements/Commentary_No27_overview.pdf) accessed July 9th, 2019.
3. Park TH, Eichling JO, Schechtman KB, et al. Risk of radiation induced skin injuries from arrhythmia ablation procedures. *Pacing Clin Electrophysiol* 1996;19(9):1363-9. doi: 10.1111/j.1540-8159.1996.tb04216.x [published Online First: 1996/09/01]
4. de González AB, Darby S. Risk of cancer from diagnostic X-rays: estimates for the UK and 14 other countries. *The Lancet* 2004;363(9406):345-51. doi: 10.1016/s0140-6736(04)15433-0
5. Jaffe D, Bowden GT. Ionizing radiation as an initiator: effects of proliferation and promotion time on tumor incidence in mice. *Cancer Res* 1987;47(24 Pt 1):6692-6.
6. Mathews JD, Forsythe AV, Brady Z, et al. Cancer risk in 680,000 people exposed to computed tomography scans in childhood or adolescence: data linkage study of 11 million Australians. *BMJ* 2013;346:f2360. doi: 10.1136/bmj.f2360

- 1  
2  
3  
4  
5  
6 7. Khoramian D, Sistani S, Hejazi P. Establishment of diagnostic reference levels arising  
8  
9 from common CT examinations in Semnan County, Iran. *Polish Journal of*  
10  
11 *Medical Physics and Engineering* 2019;25(1):51-55. doi: 10.2478/pjmpe-2019-  
12  
13 0008  
14  
15  
16 8. Radiological protection and safety in medicine. A report of the International  
17  
18 Commission on Radiological Protection. *Ann ICRP* 1996;26(2):1-47. [published  
19  
20 Online First: 1996/01/01]  
21  
22  
23 9. The 2007 Recommendations of the International Commission on Radiological  
24  
25 Protection. ICRP publication 103. *Ann ICRP* 2007;37(2-4):1-332. doi:  
26  
27 10.1016/j.icrp.2007.10.003 [published Online First: 2007/12/18]  
28  
29  
30 10. ICRP Publication 105. Radiation protection in medicine. *Ann ICRP* 2007;37(6):1-63.  
31  
32 doi: 10.1016/j.icrp.2008.08.001 [published Online First: 2008/09/03]  
33  
34  
35 11. Vano E, Miller DL, Martin CJ, et al. ICRP Publication 135: Diagnostic Reference  
36  
37 Levels in Medical Imaging. *Ann ICRP* 2017;46(1):1-144. doi:  
38  
39 10.1177/0146645317717209 [published Online First: 2017/10/27]  
40  
41  
42  
43 12. Diagnostic Reference Levels Based on Latest Surveys in Japan -Japan DRLs 2015-  
44  
45 2015 [Available from: [http://www.radher.jp/J-](http://www.radher.jp/J-RIME/report/DRLhoukokusyoEng.pdf)  
46  
47 [RIME/report/DRLhoukokusyoEng.pdf](http://www.radher.jp/J-RIME/report/DRLhoukokusyoEng.pdf) accessed July 9th, 2019.  
48  
49  
50  
51 13. Hart D, Wall BF. UK population dose from medical X-ray examinations. *Eur J Radiol*  
52  
53 2004;50(3):285-91. doi: 10.1016/S0720-048X(03)00178-5 [published Online  
54  
55 First: 2004/05/18]  
56  
57  
58 14. Dumonceau JM, Garcia-Fernandez FJ, Verdun FR, et al. Radiation protection in  
59  
60

- 1  
2  
3  
4  
5  
6 digestive endoscopy: European Society of Digestive Endoscopy (ESGE)  
7  
8 guideline. *Endoscopy* 2012;44(4):408-21. doi: 10.1055/s-0031-1291791  
9  
10 [published Online First: 2012/03/23]  
11  
12  
13  
14 15. Hayashi S, Takenaka M, Hosono M, et al. Radiation exposure during image-guided  
15  
16 endoscopic procedures: The next quality indicator for endoscopic retrograde  
17  
18 cholangiopancreatography. *World Journal of Clinical Cases* 2018;6(16):1087-93.  
19  
20 doi: 10.12998/wjcc.v6.i16.1087  
21  
22  
23  
24 16. Hayashi S, Takenaka M, Hosono M, et al. Radiation exposure during image-guided  
25  
26 endoscopic procedures: The next quality indicator for endoscopic retrograde  
27  
28 cholangiopancreatography. *World J Clin Cases* 2018;6(16):1087-93. doi:  
29  
30 10.12998/wjcc.v6.i16.1087 [published Online First: 2019/01/08]  
31  
32  
33  
34 17. Adler DG, Lieb JG, 2nd, Cohen J, et al. Quality indicators for ERCP. *Gastrointestinal*  
35  
36 *endoscopy* 2015;81(1):54-66. doi: 10.1016/j.gie.2014.07.056 [published Online  
37  
38 First: 2014/12/07]  
39  
40  
41  
42 18. Matsuda K, Tanaka K, Fujishiro M, et al. Design paper: Japan Endoscopy Database  
43  
44 (JED): A prospective, large database project related to gastroenterological  
45  
46 endoscopy in Japan. *Digestive endoscopy : official journal of the Japan*  
47  
48 *Gastroenterological Endoscopy Society* 2018;30(1):5-19. doi:  
49  
50 10.1111/den.12964 [published Online First: 2017/09/15]  
51  
52  
53  
54 19. Diagnostic reference levels in medical imaging: review and additional advice. *Ann*  
55  
56 *ICRP* 2001;31(4):33-52. [published Online First: 2003/04/11]  
57  
58  
59  
60 20. Lynskey GE, 3rd, Powell DK, Dixon RG, et al. Radiation protection in interventional

- radiology: survey results of attitudes and use. *Journal of vascular and interventional radiology* : *JVIR* 2013;24(10):1547-51 e3. doi: 10.1016/j.jvir.2013.05.039 [published Online First: 2013/07/24]
21. Hayashi S, Nishida T, Matsubara T, et al. Radiation exposure dose and influencing factors during endoscopic retrograde cholangiopancreatography. *PloS one* 2018;13(11):e0207539. doi: 10.1371/journal.pone.0207539 [published Online First: 2018/11/20]
22. Strahlenschutz Bf. Bekanntmachung der aktualisierten diagnostischen Referenzwerte für diagnostische und interventionelle Röntgenanwendungen Vom 22. Juni 2016
- 2016 [Available from: <https://www.klinikum.uni-heidelberg.de/fileadmin/strahlenschutz/linkimages/PDF/DRW-XRay-2016-07-15.pdf> accessed Nov 9 2019.
23. Hayashi S, Nishida T, Shimakoshi H, et al. Mo2020 Novel Processing Engine for X-Ray Fluoroscopic Images (Faice-V Ns1) Can Reduce Radiation Exposure in the Procedure of ERCP But Keep the Quality of Images. *Gastrointestinal endoscopy* 2017;85(5):AB518. doi: 10.1016/j.gie.2017.03.1207
24. Hayashi S, Higaki Y, Tomita R, et al. 940 Disease Site and Processing Engine Affect Radiation Exposure Dose during Ercp. *Gastrointestinal endoscopy* 2018;87(6):AB137. doi: 10.1016/j.gie.2018.04.1348
25. Takenaka M, Hayashi S, Nishida T, et al. Mo1090 EXAMINATION OF ACTUAL RADIATION EXPOSURE DOSE OF THE PATIENTS WHO PERFORMED EUS-

1  
2  
3  
4  
5  
6 GUIDED DRAINAGE (EUS-BD/EUS-PD/EUS-CD). *Gastrointestinal endoscopy*

7  
8 2019;89(6):AB444-AB45. doi: 10.1016/j.gie.2019.03.1247

9  
10  
11 26. Vassileva J, Rehani M. Diagnostic reference levels. *AJR Am J Roentgenol*

12  
13 2015;204(1):W1-3. doi: 10.2214/AJR.14.12794 [published Online First:

14  
15 2014/12/30]

16  
17  
18  
19  
20  
21  
22  
23  
24  
25  
26  
27  
28  
29  
30  
31  
32  
33  
34  
35  
36  
37  
38  
39  
40  
41  
42  
43  
44  
45  
46  
47  
48  
49  
50  
51  
52  
53  
54  
55  
56  
57  
58  
59  
60

For peer review only



1  
2  
3  
4  
5  
6  
7  
8  
9  
10  
11  
12  
13  
14  
15  
16  
17  
18  
19  
20  
21  
22  
23  
24  
25  
26  
27  
28  
29  
30  
31  
32  
33  
34  
35  
36  
37  
38  
39  
40  
41  
42  
43  
44  
45  
46  
47  
48  
49  
50  
51  
52  
53  
54  
55  
56  
57  
58  
59  
60

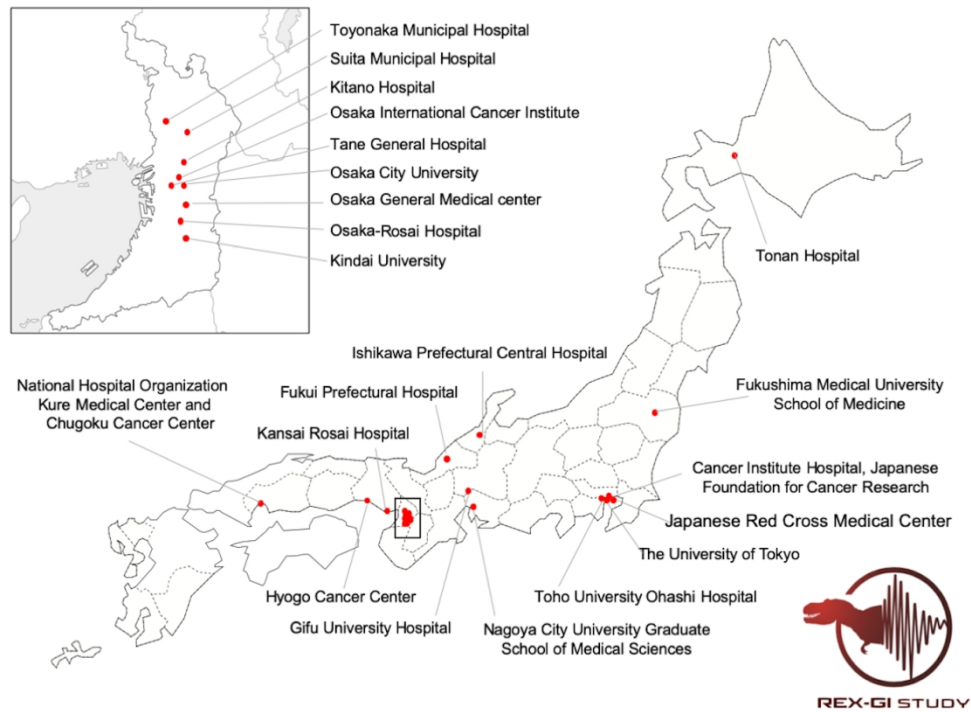

Figure 1. The participating hospitals in this study.

119x90mm (300 x 300 DPI)

# Reporting checklist for protocol of a clinical trial.

Based on the SPIRIT guidelines.

## Instructions to authors

Complete this checklist by entering the page numbers from your manuscript where readers will find each of the items listed below.

Your article may not currently address all the items on the checklist. Please modify your text to include the missing information. If you are certain that an item does not apply, please write "n/a" and provide a short explanation.

Upload your completed checklist as an extra file when you submit to a journal.

In your methods section, say that you used the SPIRIT reporting guidelines, and cite them as:

Chan A-W, Tetzlaff JM, Altman DG, Laupacis A, Gøtzsche PC, Krleža-Jerić K, Hróbjartsson A, Mann H, Dickersin K, Berlin J, Doré C, Parulekar W, Summerskill W, Groves T, Schulz K, Sox H, Rockhold FW, Rennie D, Moher D. SPIRIT 2013 Statement: Defining standard protocol items for clinical trials. *Ann Intern Med.* 2013;158(3):200-207

|                                             |                     | Reporting Item                                                                                               | Page Number |
|---------------------------------------------|---------------------|--------------------------------------------------------------------------------------------------------------|-------------|
| <b>Administrative information</b>           |                     |                                                                                                              |             |
| Title                                       | <a href="#">#1</a>  | Descriptive title identifying the study design, population, interventions, and, if applicable, trial acronym | 1           |
| Trial registration                          | <a href="#">#2a</a> | Trial identifier and registry name. If not yet registered, name of intended registry                         | 6, 11       |
| Trial registration: data set                | <a href="#">#2b</a> | All items from the World Health Organization Trial Registration Data Set                                     | 6, 11       |
| Protocol version                            | <a href="#">#3</a>  | Date and version identifier                                                                                  | 16          |
| Funding                                     | <a href="#">#4</a>  | Sources and types of financial, material, and other support                                                  | 17          |
| Roles and responsibilities: contributorship | <a href="#">#5a</a> | Names, affiliations, and roles of protocol contributors                                                      | 15          |

|    |                           |                     |                                                                    |        |
|----|---------------------------|---------------------|--------------------------------------------------------------------|--------|
| 1  | Roles and                 | <a href="#">#5b</a> | Name and contact information for the trial sponsor                 | N.A.   |
| 2  | responsibilities:         |                     |                                                                    |        |
| 3  | sponsor contact           |                     |                                                                    |        |
| 4  | information               |                     |                                                                    |        |
| 5  |                           |                     |                                                                    |        |
| 6  |                           |                     |                                                                    |        |
| 7  |                           |                     |                                                                    |        |
| 8  | Roles and                 | <a href="#">#5c</a> | Role of study sponsor and funders, if any, in study design;        | N.A.   |
| 9  | responsibilities:         |                     | collection, management, analysis, and interpretation of data;      |        |
| 10 | sponsor and funder        |                     | writing of the report; and the decision to submit the report for   |        |
| 11 |                           |                     | publication, including whether they will have ultimate authority   |        |
| 12 |                           |                     | over any of these activities                                       |        |
| 13 |                           |                     |                                                                    |        |
| 14 |                           |                     |                                                                    |        |
| 15 |                           |                     |                                                                    |        |
| 16 | Roles and                 | <a href="#">#5d</a> | Composition, roles, and responsibilities of the coordinating       | 12, 14 |
| 17 | responsibilities:         |                     | centre, steering committee, endpoint adjudication committee,       |        |
| 18 | committees                |                     | data management team, and other individuals or groups              |        |
| 19 |                           |                     | overseeing the trial, if applicable (see Item 21a for data         |        |
| 20 |                           |                     | monitoring committee)                                              |        |
| 21 |                           |                     |                                                                    |        |
| 22 |                           |                     |                                                                    |        |
| 23 |                           |                     |                                                                    |        |
| 24 | <b>Introduction</b>       |                     |                                                                    |        |
| 25 |                           |                     |                                                                    |        |
| 26 | Background and            | <a href="#">#6a</a> | Description of research question and justification for undertaking | 8-10   |
| 27 | rationale                 |                     | the trial, including summary of relevant studies (published and    |        |
| 28 |                           |                     | unpublished) examining benefits and harms for each intervention    |        |
| 29 |                           |                     |                                                                    |        |
| 30 |                           |                     |                                                                    |        |
| 31 |                           |                     |                                                                    |        |
| 32 | Background and            | <a href="#">#6b</a> | Explanation for choice of comparators                              | 9      |
| 33 | rationale: choice of      |                     |                                                                    |        |
| 34 | comparators               |                     |                                                                    |        |
| 35 |                           |                     |                                                                    |        |
| 36 |                           |                     |                                                                    |        |
| 37 | Objectives                | <a href="#">#7</a>  | Specific objectives or hypotheses                                  | 9-10   |
| 38 |                           |                     |                                                                    |        |
| 39 |                           |                     |                                                                    |        |
| 40 | Trial design              | <a href="#">#8</a>  | Description of trial design including type of trial (eg, parallel  | 11     |
| 41 |                           |                     | group, crossover, factorial, single group), allocation ratio, and  |        |
| 42 |                           |                     | framework (eg, superiority, equivalence, non-inferiority,          |        |
| 43 |                           |                     | exploratory)                                                       |        |
| 44 |                           |                     |                                                                    |        |
| 45 |                           |                     |                                                                    |        |
| 46 | <b>Methods:</b>           |                     |                                                                    |        |
| 47 | <b>Participants,</b>      |                     |                                                                    |        |
| 48 | <b>interventions, and</b> |                     |                                                                    |        |
| 49 | <b>outcomes</b>           |                     |                                                                    |        |
| 50 |                           |                     |                                                                    |        |
| 51 |                           |                     |                                                                    |        |
| 52 |                           |                     |                                                                    |        |
| 53 | Study setting             | <a href="#">#9</a>  | Description of study settings (eg, community clinic, academic      | 12     |
| 54 |                           |                     | hospital) and list of countries where data will be collected.      |        |
| 55 |                           |                     | Reference to where list of study sites can be obtained             |        |
| 56 |                           |                     |                                                                    |        |
| 57 |                           |                     |                                                                    |        |
| 58 |                           |                     |                                                                    |        |
| 59 |                           |                     |                                                                    |        |
| 60 |                           |                     |                                                                    |        |

|    |                              |                      |                                                                                                                                                                                                                                                                                                                                                                                |      |
|----|------------------------------|----------------------|--------------------------------------------------------------------------------------------------------------------------------------------------------------------------------------------------------------------------------------------------------------------------------------------------------------------------------------------------------------------------------|------|
| 1  | Eligibility criteria         | <a href="#">#10</a>  | Inclusion and exclusion criteria for participants. If applicable, eligibility criteria for study centres and individuals who will perform the interventions (eg, surgeons, psychotherapists)                                                                                                                                                                                   | 12   |
| 2  |                              |                      |                                                                                                                                                                                                                                                                                                                                                                                |      |
| 3  |                              |                      |                                                                                                                                                                                                                                                                                                                                                                                |      |
| 4  |                              |                      |                                                                                                                                                                                                                                                                                                                                                                                |      |
| 5  |                              |                      |                                                                                                                                                                                                                                                                                                                                                                                |      |
| 6  | Interventions:               | <a href="#">#11a</a> | Interventions for each group with sufficient detail to allow replication, including how and when they will be administered                                                                                                                                                                                                                                                     | N.A. |
| 7  | description                  |                      |                                                                                                                                                                                                                                                                                                                                                                                |      |
| 8  |                              |                      |                                                                                                                                                                                                                                                                                                                                                                                |      |
| 9  |                              |                      |                                                                                                                                                                                                                                                                                                                                                                                |      |
| 10 | Interventions:               | <a href="#">#11b</a> | Criteria for discontinuing or modifying allocated interventions for a given trial participant (eg, drug dose change in response to harms, participant request, or improving / worsening disease)                                                                                                                                                                               | N.A. |
| 11 | modifications                |                      |                                                                                                                                                                                                                                                                                                                                                                                |      |
| 12 |                              |                      |                                                                                                                                                                                                                                                                                                                                                                                |      |
| 13 |                              |                      |                                                                                                                                                                                                                                                                                                                                                                                |      |
| 14 |                              |                      |                                                                                                                                                                                                                                                                                                                                                                                |      |
| 15 | Interventions:               | <a href="#">#11c</a> | Strategies to improve adherence to intervention protocols, and any procedures for monitoring adherence (eg, drug tablet return; laboratory tests)                                                                                                                                                                                                                              | N.A. |
| 16 | adherence                    |                      |                                                                                                                                                                                                                                                                                                                                                                                |      |
| 17 |                              |                      |                                                                                                                                                                                                                                                                                                                                                                                |      |
| 18 |                              |                      |                                                                                                                                                                                                                                                                                                                                                                                |      |
| 19 |                              |                      |                                                                                                                                                                                                                                                                                                                                                                                |      |
| 20 | Interventions:               | <a href="#">#11d</a> | Relevant concomitant care and interventions that are permitted or prohibited during the trial                                                                                                                                                                                                                                                                                  | N.A. |
| 21 | concomitant care             |                      |                                                                                                                                                                                                                                                                                                                                                                                |      |
| 22 |                              |                      |                                                                                                                                                                                                                                                                                                                                                                                |      |
| 23 |                              |                      |                                                                                                                                                                                                                                                                                                                                                                                |      |
| 24 | Outcomes                     | <a href="#">#12</a>  | Primary, secondary, and other outcomes, including the specific measurement variable (eg, systolic blood pressure), analysis metric (eg, change from baseline, final value, time to event), method of aggregation (eg, median, proportion), and time point for each outcome. Explanation of the clinical relevance of chosen efficacy and harm outcomes is strongly recommended | 13   |
| 25 |                              |                      |                                                                                                                                                                                                                                                                                                                                                                                |      |
| 26 |                              |                      |                                                                                                                                                                                                                                                                                                                                                                                |      |
| 27 |                              |                      |                                                                                                                                                                                                                                                                                                                                                                                |      |
| 28 |                              |                      |                                                                                                                                                                                                                                                                                                                                                                                |      |
| 29 |                              |                      |                                                                                                                                                                                                                                                                                                                                                                                |      |
| 30 |                              |                      |                                                                                                                                                                                                                                                                                                                                                                                |      |
| 31 |                              |                      |                                                                                                                                                                                                                                                                                                                                                                                |      |
| 32 |                              |                      |                                                                                                                                                                                                                                                                                                                                                                                |      |
| 33 |                              |                      |                                                                                                                                                                                                                                                                                                                                                                                |      |
| 34 | Participant timeline         | <a href="#">#13</a>  | Time schedule of enrolment, interventions (including any run-ins and washouts), assessments, and visits for participants. A schematic diagram is highly recommended (see Figure)                                                                                                                                                                                               | 15   |
| 35 |                              |                      |                                                                                                                                                                                                                                                                                                                                                                                |      |
| 36 |                              |                      |                                                                                                                                                                                                                                                                                                                                                                                |      |
| 37 |                              |                      |                                                                                                                                                                                                                                                                                                                                                                                |      |
| 38 |                              |                      |                                                                                                                                                                                                                                                                                                                                                                                |      |
| 39 |                              |                      |                                                                                                                                                                                                                                                                                                                                                                                |      |
| 40 | Sample size                  | <a href="#">#14</a>  | Estimated number of participants needed to achieve study objectives and how it was determined, including clinical and statistical assumptions supporting any sample size calculations                                                                                                                                                                                          | 13   |
| 41 |                              |                      |                                                                                                                                                                                                                                                                                                                                                                                |      |
| 42 |                              |                      |                                                                                                                                                                                                                                                                                                                                                                                |      |
| 43 |                              |                      |                                                                                                                                                                                                                                                                                                                                                                                |      |
| 44 |                              |                      |                                                                                                                                                                                                                                                                                                                                                                                |      |
| 45 | Recruitment                  | <a href="#">#15</a>  | Strategies for achieving adequate participant enrolment to reach target sample size                                                                                                                                                                                                                                                                                            | 14   |
| 46 |                              |                      |                                                                                                                                                                                                                                                                                                                                                                                |      |
| 47 |                              |                      |                                                                                                                                                                                                                                                                                                                                                                                |      |
| 48 |                              |                      |                                                                                                                                                                                                                                                                                                                                                                                |      |
| 49 | <b>Methods: Assignment</b>   |                      |                                                                                                                                                                                                                                                                                                                                                                                |      |
| 50 | <b>of interventions (for</b> |                      |                                                                                                                                                                                                                                                                                                                                                                                |      |
| 51 | <b>controlled trials)</b>    |                      |                                                                                                                                                                                                                                                                                                                                                                                |      |
| 52 |                              |                      |                                                                                                                                                                                                                                                                                                                                                                                |      |
| 53 |                              |                      |                                                                                                                                                                                                                                                                                                                                                                                |      |
| 54 | Allocation: sequence         | <a href="#">#16a</a> | Method of generating the allocation sequence (eg, computer-generated random numbers), and list of any factors for stratification. To reduce predictability of a random sequence, details of any planned restriction (eg, blocking) should be                                                                                                                                   | N.A. |
| 55 | generation                   |                      |                                                                                                                                                                                                                                                                                                                                                                                |      |
| 56 |                              |                      |                                                                                                                                                                                                                                                                                                                                                                                |      |
| 57 |                              |                      |                                                                                                                                                                                                                                                                                                                                                                                |      |
| 58 |                              |                      |                                                                                                                                                                                                                                                                                                                                                                                |      |
| 59 |                              |                      |                                                                                                                                                                                                                                                                                                                                                                                |      |
| 60 |                              |                      |                                                                                                                                                                                                                                                                                                                                                                                |      |

provided in a separate document that is unavailable to those who enrol participants or assign interventions

|    |                        |                      |                                                                       |
|----|------------------------|----------------------|-----------------------------------------------------------------------|
| 1  |                        |                      |                                                                       |
| 2  |                        |                      |                                                                       |
| 3  |                        |                      |                                                                       |
| 4  | Allocation             | <a href="#">#16b</a> | Mechanism of implementing the allocation sequence (eg, central N.A.   |
| 5  | concealment            |                      | telephone; sequentially numbered, opaque, sealed envelopes),          |
| 6  |                        |                      | describing any steps to conceal the sequence until interventions      |
| 7  | mechanism              |                      | are assigned                                                          |
| 8  |                        |                      |                                                                       |
| 9  |                        |                      |                                                                       |
| 10 |                        |                      |                                                                       |
| 11 | Allocation:            | <a href="#">#16c</a> | Who will generate the allocation sequence, who will enrol N.A.        |
| 12 | implementation         |                      | participants, and who will assign participants to interventions       |
| 13 |                        |                      |                                                                       |
| 14 |                        |                      |                                                                       |
| 15 | Blinding (masking)     | <a href="#">#17a</a> | Who will be blinded after assignment to interventions (eg, trial N.A. |
| 16 |                        |                      | participants, care providers, outcome assessors, data analysts),      |
| 17 |                        |                      | and how                                                               |
| 18 |                        |                      |                                                                       |
| 19 |                        |                      |                                                                       |
| 20 | Blinding (masking):    | <a href="#">#17b</a> | If blinded, circumstances under which unblinding is permissible, N.A. |
| 21 | emergency unblinding   |                      | and procedure for revealing a participant's allocated intervention    |
| 22 |                        |                      | during the trial                                                      |
| 23 |                        |                      |                                                                       |
| 24 |                        |                      |                                                                       |
| 25 | <b>Methods: Data</b>   |                      |                                                                       |
| 26 | <b>collection,</b>     |                      |                                                                       |
| 27 | <b>management, and</b> |                      |                                                                       |
| 28 | <b>analysis</b>        |                      |                                                                       |
| 29 |                        |                      |                                                                       |
| 30 |                        |                      |                                                                       |
| 31 |                        |                      |                                                                       |
| 32 | Data collection plan   | <a href="#">#18a</a> | Plans for assessment and collection of outcome, baseline, and 14      |
| 33 |                        |                      | other trial data, including any related processes to promote data     |
| 34 |                        |                      | quality (eg, duplicate measurements, training of assessors) and a     |
| 35 |                        |                      | description of study instruments (eg, questionnaires, laboratory      |
| 36 |                        |                      | tests) along with their reliability and validity, if known.           |
| 37 |                        |                      | Reference to where data collection forms can be found, if not in      |
| 38 |                        |                      | the protocol                                                          |
| 39 |                        |                      |                                                                       |
| 40 |                        |                      |                                                                       |
| 41 |                        |                      |                                                                       |
| 42 |                        |                      |                                                                       |
| 43 | Data collection plan:  | <a href="#">#18b</a> | Plans to promote participant retention and complete follow-up, 15     |
| 44 | retention              |                      | including list of any outcome data to be collected for participants   |
| 45 |                        |                      | who discontinue or deviate from intervention protocols                |
| 46 |                        |                      |                                                                       |
| 47 |                        |                      |                                                                       |
| 48 |                        |                      |                                                                       |
| 49 | Data management        | <a href="#">#19</a>  | Plans for data entry, coding, security, and storage, including any 15 |
| 50 |                        |                      | related processes to promote data quality (eg, double data entry;     |
| 51 |                        |                      | range checks for data values). Reference to where details of data     |
| 52 |                        |                      | management procedures can be found, if not in the protocol            |
| 53 |                        |                      |                                                                       |
| 54 |                        |                      |                                                                       |
| 55 |                        |                      |                                                                       |
| 56 | Statistics: outcomes   | <a href="#">#20a</a> | Statistical methods for analysing primary and secondary 14            |
| 57 |                        |                      | outcomes. Reference to where other details of the statistical         |
| 58 |                        |                      | analysis plan can be found, if not in the protocol                    |
| 59 |                        |                      |                                                                       |
| 60 |                        |                      |                                                                       |

|    |                            |                      |                                                                    |      |
|----|----------------------------|----------------------|--------------------------------------------------------------------|------|
| 1  | Statistics: additional     | <a href="#">#20b</a> | Methods for any additional analyses (eg, subgroup and adjusted     | N.A. |
| 2  | analyses                   |                      | analyses)                                                          |      |
| 3  |                            |                      |                                                                    |      |
| 4  | Statistics: analysis       | <a href="#">#20c</a> | Definition of analysis population relating to protocol non-        | 15   |
| 5  | population and missing     |                      | adherence (eg, as randomised analysis), and any statistical        |      |
| 6  | data                       |                      | methods to handle missing data (eg, multiple imputation)           |      |
| 7  |                            |                      |                                                                    |      |
| 8  |                            |                      |                                                                    |      |
| 9  |                            |                      |                                                                    |      |
| 10 | <b>Methods: Monitoring</b> |                      |                                                                    |      |
| 11 |                            |                      |                                                                    |      |
| 12 | Data monitoring:           | <a href="#">#21a</a> | Composition of data monitoring committee (DMC); summary of         | 15   |
| 13 | formal committee           |                      | its role and reporting structure; statement of whether it is       |      |
| 14 |                            |                      | independent from the sponsor and competing interests; and          |      |
| 15 |                            |                      | reference to where further details about its charter can be found, |      |
| 16 |                            |                      | if not in the protocol. Alternatively, an explanation of why a     |      |
| 17 |                            |                      | DMC is not needed                                                  |      |
| 18 |                            |                      |                                                                    |      |
| 19 |                            |                      |                                                                    |      |
| 20 |                            |                      |                                                                    |      |
| 21 |                            |                      |                                                                    |      |
| 22 | Data monitoring:           | <a href="#">#21b</a> | Description of any interim analyses and stopping guidelines,       | 15   |
| 23 | interim analysis           |                      | including who will have access to these interim results and make   |      |
| 24 |                            |                      | the final decision to terminate the trial                          |      |
| 25 |                            |                      |                                                                    |      |
| 26 |                            |                      |                                                                    |      |
| 27 | Harms                      | <a href="#">#22</a>  | Plans for collecting, assessing, reporting, and managing solicited | N.A. |
| 28 |                            |                      | and spontaneously reported adverse events and other unintended     |      |
| 29 |                            |                      | effects of trial interventions or trial conduct                    |      |
| 30 |                            |                      |                                                                    |      |
| 31 |                            |                      |                                                                    |      |
| 32 |                            |                      |                                                                    |      |
| 33 | Auditing                   | <a href="#">#23</a>  | Frequency and procedures for auditing trial conduct, if any, and   | N.A. |
| 34 |                            |                      | whether the process will be independent from investigators and     |      |
| 35 |                            |                      | the sponsor                                                        |      |
| 36 |                            |                      |                                                                    |      |
| 37 |                            |                      |                                                                    |      |
| 38 | <b>Ethics and</b>          |                      |                                                                    |      |
| 39 | <b>dissemination</b>       |                      |                                                                    |      |
| 40 |                            |                      |                                                                    |      |
| 41 |                            |                      |                                                                    |      |
| 42 | Research ethics            | <a href="#">#24</a>  | Plans for seeking research ethics committee / institutional review | 15   |
| 43 | approval                   |                      | board (REC / IRB) approval                                         |      |
| 44 |                            |                      |                                                                    |      |
| 45 |                            |                      |                                                                    |      |
| 46 | Protocol amendments        | <a href="#">#25</a>  | Plans for communicating important protocol modifications (eg,      | N.A. |
| 47 |                            |                      | changes to eligibility criteria, outcomes, analyses) to relevant   |      |
| 48 |                            |                      | parties (eg, investigators, REC / IRBs, trial participants, trial  |      |
| 49 |                            |                      | registries, journals, regulators)                                  |      |
| 50 |                            |                      |                                                                    |      |
| 51 |                            |                      |                                                                    |      |
| 52 |                            |                      |                                                                    |      |
| 53 | Consent or assent          | <a href="#">#26a</a> | Who will obtain informed consent or assent from potential trial    | 15   |
| 54 |                            |                      | participants or authorised surrogates, and how (see Item 32)       |      |
| 55 |                            |                      |                                                                    |      |
| 56 |                            |                      |                                                                    |      |
| 57 |                            |                      |                                                                    |      |
| 58 |                            |                      |                                                                    |      |
| 59 |                            |                      |                                                                    |      |
| 60 |                            |                      |                                                                    |      |

|    |                          |                      |                                                                      |        |
|----|--------------------------|----------------------|----------------------------------------------------------------------|--------|
| 1  | Consent or assent:       | <a href="#">#26b</a> | Additional consent provisions for collection and use of              | N.A.   |
| 2  | ancillary studies        |                      | participant data and biological specimens in ancillary studies, if   |        |
| 3  |                          |                      | applicable                                                           |        |
| 4  |                          |                      |                                                                      |        |
| 5  |                          |                      |                                                                      |        |
| 6  | Confidentiality          | <a href="#">#27</a>  | How personal information about potential and enrolled                | 14     |
| 7  |                          |                      | participants will be collected, shared, and maintained in order to   |        |
| 8  |                          |                      | protect confidentiality before, during, and after the trial          |        |
| 9  |                          |                      |                                                                      |        |
| 10 |                          |                      |                                                                      |        |
| 11 | Declaration of interests | <a href="#">#28</a>  | Financial and other competing interests for principal investigators  | 17, 18 |
| 12 |                          |                      | for the overall trial and each study site                            |        |
| 13 |                          |                      |                                                                      |        |
| 14 |                          |                      |                                                                      |        |
| 15 | Data access              | <a href="#">#29</a>  | Statement of who will have access to the final trial dataset, and    | 17     |
| 16 |                          |                      | disclosure of contractual agreements that limit such access for      |        |
| 17 |                          |                      | investigators                                                        |        |
| 18 |                          |                      |                                                                      |        |
| 19 |                          |                      |                                                                      |        |
| 20 | Ancillary and post trial | <a href="#">#30</a>  | Provisions, if any, for ancillary and post-trial care, and for       | N.A.   |
| 21 | care                     |                      | compensation to those who suffer harm from trial participation       |        |
| 22 |                          |                      |                                                                      |        |
| 23 |                          |                      |                                                                      |        |
| 24 | Dissemination policy:    | <a href="#">#31a</a> | Plans for investigators and sponsor to communicate trial results     | 14     |
| 25 | trial results            |                      | to participants, healthcare professionals, the public, and other     |        |
| 26 |                          |                      | relevant groups (eg, via publication, reporting in results           |        |
| 27 |                          |                      | databases, or other data sharing arrangements), including any        |        |
| 28 |                          |                      | publication restrictions                                             |        |
| 29 |                          |                      |                                                                      |        |
| 30 |                          |                      |                                                                      |        |
| 31 |                          |                      |                                                                      |        |
| 32 |                          |                      |                                                                      |        |
| 33 | Dissemination policy:    | <a href="#">#31b</a> | Authorship eligibility guidelines and any intended use of            | 18     |
| 34 | authorship               |                      | professional writers                                                 |        |
| 35 |                          |                      |                                                                      |        |
| 36 |                          |                      |                                                                      |        |
| 37 | Dissemination policy:    | <a href="#">#31c</a> | Plans, if any, for granting public access to the full protocol,      | N.A.   |
| 38 | reproducible research    |                      | participant-level dataset, and statistical code                      |        |
| 39 |                          |                      |                                                                      |        |
| 40 |                          |                      |                                                                      |        |
| 41 | <b>Appendices</b>        |                      |                                                                      |        |
| 42 |                          |                      |                                                                      |        |
| 43 | Informed consent         | <a href="#">#32</a>  | Model consent form and other related documentation given to          | N.A.   |
| 44 | materials                |                      | participants and authorised surrogates                               |        |
| 45 |                          |                      |                                                                      |        |
| 46 |                          |                      |                                                                      |        |
| 47 | Biological specimens     | <a href="#">#33</a>  | Plans for collection, laboratory evaluation, and storage of          | N.A.   |
| 48 |                          |                      | biological specimens for genetic or molecular analysis in the        |        |
| 49 |                          |                      | current trial and for future use in ancillary studies, if applicable |        |
| 50 |                          |                      |                                                                      |        |
| 51 |                          |                      |                                                                      |        |

None The SPIRIT checklist is distributed under the terms of the Creative Commons Attribution License CC-BY-ND 3.0. This checklist can be completed online using <https://www.goodreports.org/>, a tool made by the [EQUATOR Network](#) in collaboration with [Penelope.ai](#)

# BMJ Open

## A Multicenter Prospective Observational Study Protocol for Radiation Exposure from Gastrointestinal Fluoroscopic Procedures (REX-GI study)

|                               |                                                                                                                                                                                                                                                                                                                                                                                                                                                                                                                                                                                                                                                                                                                                                                                                                                                                                                                                                                                                                                                                                                                                                                                                                                                                                                                                                                                                                                                                                                                                                                                                                                                                                                                                                                                                                                                                                                                                                                                                                                                      |
|-------------------------------|------------------------------------------------------------------------------------------------------------------------------------------------------------------------------------------------------------------------------------------------------------------------------------------------------------------------------------------------------------------------------------------------------------------------------------------------------------------------------------------------------------------------------------------------------------------------------------------------------------------------------------------------------------------------------------------------------------------------------------------------------------------------------------------------------------------------------------------------------------------------------------------------------------------------------------------------------------------------------------------------------------------------------------------------------------------------------------------------------------------------------------------------------------------------------------------------------------------------------------------------------------------------------------------------------------------------------------------------------------------------------------------------------------------------------------------------------------------------------------------------------------------------------------------------------------------------------------------------------------------------------------------------------------------------------------------------------------------------------------------------------------------------------------------------------------------------------------------------------------------------------------------------------------------------------------------------------------------------------------------------------------------------------------------------------|
| Journal:                      | <i>BMJ Open</i>                                                                                                                                                                                                                                                                                                                                                                                                                                                                                                                                                                                                                                                                                                                                                                                                                                                                                                                                                                                                                                                                                                                                                                                                                                                                                                                                                                                                                                                                                                                                                                                                                                                                                                                                                                                                                                                                                                                                                                                                                                      |
| Manuscript ID                 | bmjopen-2019-033604.R2                                                                                                                                                                                                                                                                                                                                                                                                                                                                                                                                                                                                                                                                                                                                                                                                                                                                                                                                                                                                                                                                                                                                                                                                                                                                                                                                                                                                                                                                                                                                                                                                                                                                                                                                                                                                                                                                                                                                                                                                                               |
| Article Type:                 | Protocol                                                                                                                                                                                                                                                                                                                                                                                                                                                                                                                                                                                                                                                                                                                                                                                                                                                                                                                                                                                                                                                                                                                                                                                                                                                                                                                                                                                                                                                                                                                                                                                                                                                                                                                                                                                                                                                                                                                                                                                                                                             |
| Date Submitted by the Author: | 20-Dec-2019                                                                                                                                                                                                                                                                                                                                                                                                                                                                                                                                                                                                                                                                                                                                                                                                                                                                                                                                                                                                                                                                                                                                                                                                                                                                                                                                                                                                                                                                                                                                                                                                                                                                                                                                                                                                                                                                                                                                                                                                                                          |
| Complete List of Authors:     | <p>Nishida, Tsutomu ; Toyonaka Municipal Hospital, Department of Gastroenterology<br/> Hayashi, Shiro; Toyonaka Municipal Hospital, Department of Gastroenterology; Kento Hayashi Clinic, Department of Gastroenterology and Internal Medicine<br/> Takenaka, Mamoru ; Kindai University, Department of Gastroenterology and Hepatology<br/> Hosono, Makoto ; Kindai University, Department of Radiology<br/> Kogure, Hirofumi; The University of Tokyo, Department of Gastroenterology<br/> Hasatani, Kenkei ; Fukui Prefectural Hospital, Department of Gastroenterology<br/> Yamaguchi, Shinjiro ; Kansai Rosai Hospital, Department of Gastroenterology and Hepatology<br/> Maruyama, Hirotsugu ; Osaka City University, Department of Gastroenterology<br/> Doyama, Hisashi ; Ishikawa Prefectural Central Hospital, Department of Gastroenterology<br/> Ihara, Hideyuki ; Tonan Hospital, Department of Gastroenterology<br/> Yoshio, Toshiyuki ; Cancer Institute Hospital, Japanese Foundation for Cancer Research, Department of Gastroenterology<br/> Nagaike, Koji ; Suita Municipal Hospital, Department of Gastroenterology and Hepatology<br/> Yamada, Takuya ; Osaka Rosai Hospital, Department of Gastroenterology and Hepatology,<br/> Yakushijin, Takayuki ; Osaka General Medical Center, Department of Gastroenterology and Hepatology<br/> Takagi, Tadayuki ; Fukushima Medical University School of Medicine, Department of Gastroenterology<br/> Tsumura, Hidetaka ; Hyogo Cancer Center, Department of Gastroenterological Oncology,<br/> Kurita, Akira ; Kitano Hospital, Department of Gastroenterology and Hepatology, Digestive Disease Center<br/> Asai, Satoshi ; Tane General Hospital, Department of Gastroenterology<br/> Ito, Yukiko ; Japanese Red Cross Medical Center, Department of Gastroenterology<br/> Kuwai, Toshio ; Kure Medical Center, Department of Gastroenterology<br/> Hori, Yasuki ; Nagoya City University Graduate School of Medical Sciences Department of Gastroenterology and Metabolism</p> |



|                                    |                                                                                                                                                                                                                                                                                                                                                                                                                                                                                                          |
|------------------------------------|----------------------------------------------------------------------------------------------------------------------------------------------------------------------------------------------------------------------------------------------------------------------------------------------------------------------------------------------------------------------------------------------------------------------------------------------------------------------------------------------------------|
|                                    | Maetani, Iruru ; Toho University Ohashi Medical Center, Division of Gastroenterology and Hepatology, Department of Internal Medicine<br>Ikezawa, Kenji ; Osaka International Cancer Institute, Department of Hepatobiliary and Pancreatic Oncology<br>Iwashita, Takuji ; Gifu University Hospital, First Department of Internal Medicine<br>Matsumoto, Kengo; Toyonaka Municipal Hospital, Department of Gastroenterology<br>Inada, Masami ; Toyonaka Municipal Hospital, Department of Gastroenterology |
| <b>Primary Subject Heading</b> :   | Gastroenterology and hepatology                                                                                                                                                                                                                                                                                                                                                                                                                                                                          |
| <b>Secondary Subject Heading</b> : | Radiology and imaging, Public health, Research methods                                                                                                                                                                                                                                                                                                                                                                                                                                                   |
| <b>Keywords</b> :                  | Radiation Exposure, Diagnostic Reference Levels, ERCP, Gastrointestinal Fluoroscopic Procedure, Endoscopy < GASTROENTEROLOGY                                                                                                                                                                                                                                                                                                                                                                             |
|                                    |                                                                                                                                                                                                                                                                                                                                                                                                                                                                                                          |

SCHOLARONE™  
Manuscripts



I, the Submitting Author has the right to grant and does grant on behalf of all authors of the Work (as defined in the below author licence), an exclusive licence and/or a non-exclusive licence for contributions from authors who are: i) UK Crown employees; ii) where BMJ has agreed a CC-BY licence shall apply, and/or iii) in accordance with the terms applicable for US Federal Government officers or employees acting as part of their official duties; on a worldwide, perpetual, irrevocable, royalty-free basis to BMJ Publishing Group Ltd ("BMJ") its licensees and where the relevant Journal is co-owned by BMJ to the co-owners of the Journal, to publish the Work in this journal and any other BMJ products and to exploit all rights, as set out in our [licence](#).

The Submitting Author accepts and understands that any supply made under these terms is made by BMJ to the Submitting Author unless you are acting as an employee on behalf of your employer or a postgraduate student of an affiliated institution which is paying any applicable article publishing charge ("APC") for Open Access articles. Where the Submitting Author wishes to make the Work available on an Open Access basis (and intends to pay the relevant APC), the terms of reuse of such Open Access shall be governed by a Creative Commons licence – details of these licences and which [Creative Commons](#) licence will apply to this Work are set out in our licence referred to above.

Other than as permitted in any relevant BMJ Author's Self Archiving Policies, I confirm this Work has not been accepted for publication elsewhere, is not being considered for publication elsewhere and does not duplicate material already published. I confirm all authors consent to publication of this Work and authorise the granting of this licence.

1  
2  
3  
4  
5  
6  
7  
8  
9  
10  
11  
12  
13  
14  
15  
16  
17  
18  
19  
20  
21  
22  
23  
24  
25  
26  
27  
28  
29  
30  
31  
32  
33  
34  
35  
36  
37  
38  
39  
40  
41  
42  
43  
44  
45  
46  
47  
48  
49  
50  
51  
52  
53  
54  
55  
56  
57  
58  
59  
60

1 **A Multicenter Prospective Observational Study Protocol for Radiation Exposure**  
2 **from Gastrointestinal Fluoroscopic Procedures (REX-GI study)**

3  
4 Tsutomu Nishida<sup>1</sup>, Shiro Hayashi<sup>1,2</sup>, Mamoru Takenaka<sup>3</sup>, Makoto Hosono<sup>4</sup>, Hirofumi  
5 Kogure<sup>5</sup>, Kenkei Hasatani<sup>6</sup>, Shinjiro Yamaguchi<sup>7</sup>, Hirotsugu Maruyama<sup>8</sup>, Hisashi  
6 Doyama<sup>9</sup>, Hideyuki Ihara<sup>10</sup>, Toshiyuki Yoshio<sup>11</sup>, Koji Nagaike<sup>12</sup>, Takuya Yamada<sup>13</sup>,  
7 Takayuki Yakushijin<sup>14</sup>, Tadayuki Takagi<sup>15</sup>, Hidetaka Tsumura<sup>16</sup>, Akira Kurita<sup>17</sup>,  
8 Satoshi Asai<sup>18</sup>, Yukiko Ito<sup>19</sup>, Toshio Kuwai<sup>20</sup>, Yasuki Hori<sup>21</sup>, Iruru Maetani<sup>22</sup>, Kenji  
9 Ikezawa<sup>23</sup>, Takuji Iwashita<sup>24</sup>, Kengo Matsumoto<sup>1</sup>, Masami Inada<sup>1</sup>

- 10  
11 1) Department of Gastroenterology, Toyonaka Municipal Hospital, Toyonaka, Osaka,  
12 Japan  
13 2) Department of Gastroenterology and Internal Medicine, Kento Hayashi Clinic,  
14 Suita, Osaka, Japan  
15 3) Department of Gastroenterology and Hepatology, Kindai University, Faculty of  
16 Medicine, Osaka-Sayama, Osaka, Japan  
17 4) Department of Radiology, Kindai University Faculty of Medicine, Osaka-Sayama,  
18 Osaka, Japan  
19 5) Department of Gastroenterology, Graduate School of Medicine, The University of  
20 Tokyo, Tokyo, Japan  
21 6) Department of Gastroenterology, Fukui Prefectural Hospital, Fukui, Fukui, Japan  
22 7) Department of Gastroenterology and Hepatology, Kansai Rosai Hospital,

- 1  
2  
3  
4  
5  
6 23 Amagasaki, Hyogo, Japan  
7  
8  
9 24 8) Department of Gastroenterology, Osaka City University, Graduate School of  
10  
11 25 Medicine, Osaka, Osaka, Japan  
12  
13  
14 26 9) Department of Gastroenterology, Ishikawa Prefectural Central Hospital, Kanazawa,  
15  
16 27 Ishikawa, Japan  
17  
18  
19 28 10) Department of Gastroenterology, Tonan Hospital, Sapporo, Hokkaido, Japan  
20  
21 29 11) Department of Gastroenterology, Cancer Institute Hospital, Japanese Foundation  
22  
23 30 for Cancer Research, Ariake, Tokyo, Japan  
24  
25  
26 31 12) Department of Gastroenterology and Hepatology, Suita Municipal Hospital, Osaka,  
27  
28 32 Japan  
29  
30  
31 33 13) Department of Gastroenterology and Hepatology, Osaka-Rosai Hospital,  
32  
33 34 Sakai, Osaka, Japan  
34  
35  
36 35 14) Department of Gastroenterology and Hepatology, Osaka General Medical Center,  
37  
38 36 Osaka, Osaka, Japan  
39  
40  
41 37 15) Department of Gastroenterology, Fukushima Medical University School of  
42  
43 38 Medicine, Fukushima, Japan  
44  
45  
46 39 16) Department of Gastroenterological Oncology, Hyogo Cancer Center, Akashi, Japan  
47  
48  
49 40 17) Department of Gastroenterology and Hepatology, Digestive Disease Center, Kitano  
50  
51 41 Hospital, Tazuke Kofukai Medical Research Institute, Osaka, Osaka, Japan  
52  
53  
54 42 18) Department of Gastroenterology, Tane General Hospital, Osaka, Osaka, Japan  
55  
56  
57 43 19) Department of Gastroenterology, Japanese Red Cross Medical Center, Tokyo,  
58  
59  
60

1  
2  
3  
4  
5  
6 44 Japan

7  
8 45 20) Department of Gastroenterology, National Hospital Organization, Kure Medical  
9  
10  
11 46 Center and Chugoku Cancer Center, Kure, Japan

12  
13 47 21) Department of Gastroenterology and Metabolism, Nagoya City University Graduate  
14  
15  
16 48 School of Medical Sciences, Nagoya, Japan

17  
18 49 22) Division of Gastroenterology and Hepatology, Department of Internal  
19  
20  
21 50 Medicine, Toho University Ohashi Medical Center, Tokyo, Japan

22  
23 51 23) Department of Hepatobiliary and Pancreatic Oncology, Osaka International Cancer  
24  
25  
26 52 Institute, Osaka, Osaka, Japan

27  
28 53 24) First Department of Internal Medicine, Gifu University Hospital, Gifu, Japan

29  
30  
31 54

32  
33 55 **Address all correspondence to:** Tsutomu Nishida, M.D.

34  
35  
36 56 Department of Gastroenterology, Toyonaka Municipal Hospital

37  
38  
39 57 4-14-1 Shibahara, Toyonaka, Osaka 560-8565 Japan

40  
41  
42 58 Email: [tnishida.gastro@gmail.com](mailto:tnishida.gastro@gmail.com)

43  
44  
45 59 Tel: +81-6-6843-0101

46  
47  
48  
49 60

50  
51 61 **Email addresses:** Tsutomu Nishida: [tnishida.gastro@gmail.com](mailto:tnishida.gastro@gmail.com), Shiro Hayashi:

52  
53 62 [hayashishiro1976@yahoo.co.jp](mailto:hayashishiro1976@yahoo.co.jp), Mamoru Takenaka: [mamoxyo45@gmail.com](mailto:mamoxyo45@gmail.com), Makoto

54  
55 63 Hosono: [hosono@med.kindai.ac.jp](mailto:hosono@med.kindai.ac.jp), Hirofumi Kogure: [kogureh-tyk@umin.ac.jp](mailto:kogureh-tyk@umin.ac.jp), Kenkei

56  
57 64 Hasatani: [hasatani9@yahoo.co.jp](mailto:hasatani9@yahoo.co.jp), Shinjiro Yamaguchi: [smay-0608@diary.ocn.ne.jp](mailto:smay-0608@diary.ocn.ne.jp),  
58  
59  
60

1  
2  
3  
4  
5  
6 65 Hirotsugu Maruyama: [hiromaruyama99@gmail.com](mailto:hiromaruyama99@gmail.com), Hisashi Doyama:  
7  
8 66 [doyama.134@gmail.com](mailto:doyama.134@gmail.com), Hideyuki Ihara: [h-ihara@tonan.gr.jp](mailto:h-ihara@tonan.gr.jp), Toshiyuki Yoshio:  
9  
10 67 [toshiyuki.yoshio@jfc.or.jp](mailto:toshiyuki.yoshio@jfc.or.jp), Koji Nagaike: [nagaike.koji@gmail.com](mailto:nagaike.koji@gmail.com), Takuya Yamada:  
11  
12 68 [yamtak1973@gmail.com](mailto:yamtak1973@gmail.com), Takayuki Yakushijin: [yakushijin@gh.opho.jp](mailto:yakushijin@gh.opho.jp), Tadayuki  
13  
14 69 Takagi: [daccho@fmu.ac.jp](mailto:daccho@fmu.ac.jp), Hidetaka Tsumura: [h.tsumura@hp.pref.hyogo.jp](mailto:h.tsumura@hp.pref.hyogo.jp), Akira  
15  
16 70 Kurita: [kuritaaki1976@gmail.com](mailto:kuritaaki1976@gmail.com), Satoshi Asai: [bonyaritetsu1226@hotmail.co.jp](mailto:bonyaritetsu1226@hotmail.co.jp),  
17  
18 71 Yukiko Ito: [yukikomd1224@gmail.com](mailto:yukikomd1224@gmail.com), Toshio Kuwai: [toshiokuwai@gmail.com](mailto:toshiokuwai@gmail.com),  
19  
20 72 Yasuki Hori: [yhori@med.nagoya-cu.ac.jp](mailto:yhori@med.nagoya-cu.ac.jp), Iruru Maetani: [u.ac.jp](mailto:mtnir50637@med.toho-<br/>21<br/>22 u.ac.jp), Kenji Ikezawa: [ikezawa-ke@mc.pref.osaka.jp](mailto:ikezawa-ke@mc.pref.osaka.jp), Takuji Iwashita:  
23  
24 73 [takuji@w7.dion.ne.jp](mailto:takuji@w7.dion.ne.jp), Kengo Matsumoto: [ken5@gh.med.osaka-u.ac.jp](mailto:ken5@gh.med.osaka-u.ac.jp), Masami Inada:  
25  
26 74 [inada-intoyo@chp.toyonaka.osaka.jp](mailto:inada-intoyo@chp.toyonaka.osaka.jp)  
27  
28 75  
29  
30  
31  
32  
33  
34 76  
35  
36 77 **Word count:** 2804 words  
37  
38  
39 78  
40  
41 79 **Keywords:** Radiation Exposure, Diagnostic Reference Levels, ERCP, Gastrointestinal  
42  
43 80 Fluoroscopic Procedure, Endoscopy.  
44  
45  
46  
47  
48  
49  
50  
51  
52  
53  
54  
55  
56  
57  
58  
59  
60

1  
2  
3  
4  
5  
6 **82 ABSTRACT**

7  
8 **83 INTRODUCTION:** Recently, the use of various endoscopic procedures under X-ray  
9  
10 **84** fluoroscopic guidance, such as endoscopic retrograde cholangiopancreatography  
11  
12 **85** (ERCP), interventional endoscopic ultrasonography (EUS), enteral endoscopy, and  
13  
14 **86** stenting, has been rapidly increasing because of the minimally invasive nature of these  
15  
16 **87** procedures compared to that of surgical intervention. With the spread of computed  
17  
18 **88** tomography and fluoroscopic interventions, including endoscopic procedures under X-  
19  
20 **89** ray guidance, high levels of radiation exposure (RE) from medical imaging have led to  
21  
22 **90** major concerns throughout society. However, information about RE related to these  
23  
24 **91** image-guided procedures in gastrointestinal endoscopy is scarce, and the RE  
25  
26 **92** reference levels have not been established. The aim of this study is to prospectively  
27  
28 **93** collect the actual RE dose and to help establish diagnostic reference levels (DRLs) in  
29  
30 **94** the field of gastroenterology in Japan.

31  
32 **95 METHODS AND ANALYSIS:** This study is a multicenter, prospective observational  
33  
34 **96** study that is being conducted to collect the actual RE from treatments and diagnostic  
35  
36 **97** procedures, including ERCP, interventional EUS, balloon-assisted enteroscopy, enteral  
37  
38 **98** metallic stent placement and enteral tube placement. We will measure the total  
39  
40 **99** fluoroscopy time (FT, min), the total dose-area product (DAP, Gy $\text{cm}^2$ ) and air-kerma  
41  
42 **100** (AK, mGy) of those procedures. Because we are collecting the actual RE data and  
43  
44 **101** identifying the influential factors through a prospective, nationwide design, this study  
45  
46 **102** will provided guidance regarding the DRLs of ERCP, interventional EUS, balloon-  
47  
48 **103** assisted enteroscopy, enteral metallic stent placement and enteral tube placement.  
49  
50  
51  
52  
53  
54  
55  
56  
57  
58  
59  
60

1  
2  
3  
4  
5  
6 104 **ETHICS AND DISSEMINATION:** This trial (Radiation EXposure from GastroIntestinal  
7  
8  
9 105 fluoroscopic procedures: REX-GI study) was registered with the UMIN Clinical Trials  
10  
11 106 Registry at <http://www.umin.ac.jp/ctr/> under number UMIN000036525 (registered 1  
12  
13  
14 107 May 2019). Approval was obtained from the Institutional Review Board of Toyonaka  
15  
16 108 Municipal Hospital (2019-02-04). The need for informed consent will be waived via the  
17  
18  
19 109 *opt-out* method of each hospital website.  
20

21 110

22  
23 111  
24  
25  
26  
27  
28  
29  
30  
31  
32  
33  
34  
35  
36  
37  
38  
39  
40  
41  
42  
43  
44  
45  
46  
47  
48  
49  
50  
51  
52  
53  
54  
55  
56  
57  
58  
59  
60



1  
2  
3  
4  
5  
6 112 **Strengths and limitations of this study**  
7

8 113 • The large, multicenter, nationwide dataset of radiation exposure doses for  
9  
10 114 gastrointestinal fluoroscopic procedures in gastrointestinal endoscopy gathered in  
11  
12 115 this study will serve as a basis for the development of diagnostic reference levels in  
13  
14 116 Japan.

15  
16  
17  
18 117 • Gastrointestinal fluoroscopic procedures have been rapidly increasing in number  
19  
20 118 and complexity, but there are still not enough available local and national DRLs in  
21  
22 119 gastrointestinal endoscopy units.

23  
24  
25  
26 120 • These data may not be valid for old models of fluoroscopic systems because this  
27  
28 121 study will include data from fluoroscopic systems with available radiation data.

29  
30  
31 122  
32  
33  
34  
35  
36  
37  
38  
39  
40  
41  
42  
43  
44  
45  
46  
47  
48  
49  
50  
51  
52  
53  
54  
55  
56  
57  
58  
59  
60

## 123 INTRODUCTION

124 Medical radiation is widely used in both medical imaging and radiation treatment. In  
125 medical imaging, fluoroscopy employs radiation to show a continuous X-ray image on a  
126 monitor and plays a major role in the daily practices of gastroenterology, digestive  
127 endoscopy, and hepatobiliary and pancreatic studies. Radiological medical imaging  
128 has both benefits and drawbacks for patients. The latter is split into two types:  
129 deterministic risks <sup>1</sup>, determined by the threshold dose, as represented by skin injury,  
130 and stochastic risks, determined by a linear no-threshold model, such as the cancer  
131 risk <sup>2</sup>. There have been some reports on radiation-induced skin injury in cardiology and  
132 interventional radiology (IVR) <sup>3</sup>, but reports from gastrointestinal endoscopy units are  
133 rare. However, all medical staff in gastrointestinal endoscopy units need to have  
134 correct knowledge of the appropriate use of medical radiation. Historically, the use of  
135 medical radiation has rapidly increased since the 1990s with the spread of computed  
136 tomography (CT), and the radiation-associated cancer risk was recognized in the same  
137 period, even when the doses of radiation were small <sup>4 5 6</sup>. In particular, the use of CT  
138 has increased approximately 12-fold in the United Kingdom and more than 20-fold in  
139 the United States in the last 25 years <sup>7</sup>.

140 The International Atomic Energy Agency (IAEA), the International Commission on  
141 Radiological Protection (ICRP), the United Nations Scientific Committee on the Effects  
142 of Atomic Radiation (UNSCEAR), and other radiological societies have been  
143 attempting to manage medical radiation exposure (RE) according to the “as low as  
144 reasonably achievable” (ALARA) principle by establishing diagnostic reference levels

1  
2  
3  
4  
5  
6 145 (DRLs) to optimize protection from medical radiation. The concept of DRLs was first  
7  
8 146 introduced by the ICRP 73 <sup>8</sup> in 1996. Then, the ICRP emphasized the important role of  
9  
10  
11 147 DRLs as a tool for optimizing patient protection <sup>9 10</sup>. Accordingly, the ICRP set specific  
12  
13  
14 148 target levels for various X-ray-related procedures in 2007 <sup>9</sup>. This movement of setting  
15  
16 149 DRLs has been led by radiation-related societies in each region, although the  
17  
18 150 movement has mainly been driven by Western countries. The ICRP 135 recommends  
19  
20  
21 151 that all individuals who are involved in patient procedures with the risk of medical  
22  
23  
24 152 exposure should be familiar with the DRL process as a tool for optimizing protection <sup>11</sup>.  
25  
26 153 DRLs are now widely accepted in not only Western countries but also Japan (Japan  
27  
28 154 DRLs 2015) <sup>12</sup>, and DRLs have become the global standard for all procedures that use  
29  
30  
31 155 ionizing radiation. Legislation has made it mandatory to establish and record DRLs in  
32  
33  
34 156 Europe, but that is not the case worldwide. The introduction of DRLs in the UK  
35  
36 157 achieved a reduction of approximately 50% in the radiation dose in typical X-ray  
37  
38 158 examinations over 15 years <sup>13</sup>. However, there is still not enough available data on RE  
39  
40  
41 159 for gastrointestinal fluoroscopic procedures, such as endoscopic retrograde  
42  
43  
44 160 cholangiopancreatography (ERCP), interventional endoscopic ultrasonography (EUS),  
45  
46 161 small bowel endoscopy, and enteral stent placement; these techniques are still being  
47  
48 162 developed and have recently been used with increasing frequency <sup>14 15</sup>.  
49  
50  
51  
52 163 Our gastroenterologists and endoscopists are still unfamiliar with the DRL concept.  
53  
54  
55 164 Among the guidelines developed by gastrointestinal endoscopy associations, the 2012  
56  
57  
58 165 European Gastrointestinal Endoscopy Society (ESGE) guidelines for radiation  
59  
60

1  
2  
3  
4  
5  
6 166 protection state that the entrance skin dose (ESD; approximately equivalent to air-  
7  
8 167 kerma in this study) and kerma-area product (KAP; approximately equivalent to the  
9  
10  
11 168 dose-area product (DAP) in this study) during diagnostic and therapeutic ERCP are 55-  
12  
13 169 347 mGy and 3-115/8-333 Gy $\text{cm}^2$ , respectively, although information regarding the  
14  
15  
16 170 DRLs of ERCP is limited because this statement is based on only approximately 600  
17  
18 171 cases of ERCP in 7 reports <sup>14</sup>. No guidelines on RE from the American Society for  
19  
20  
21 172 Gastrointestinal Endoscopy (ASGE) exist, but the ASGE recommends measuring and  
22  
23 173 documenting fluoroscopy time (FT) and radiation dose in all ERCP procedures as a  
24  
25 174 quality indicator (level of evidence: 2C) <sup>16</sup>. Although no guidelines for exposure have  
26  
27 175 been developed by the Japan Gastroenterological Endoscopy Society (JGES), a  
28  
29  
30  
31 176 description of FT exists in the item regarding ERCP in the Japan Endoscopy Database  
32  
33 177 (JED) <sup>17</sup>, which is scheduled to be implemented as a nationwide endoscopic survey in  
34  
35  
36 178 2020.

37  
38  
39  
40 179 Recently, various endoscopic procedures performed under fluoroscopic guidance are  
41  
42 180 rapidly increasing in popularity in gastrointestinal endoscopy units, where the aim is not  
43  
44  
45 181 only diagnosis but also therapeutic intervention. The ICRP recommends that DRLs  
46  
47 182 should be used to manage patient doses during both diagnostic and interventional  
48  
49  
50 183 procedures. There is difficulty in applying the DRL concept to interventional procedures  
51  
52 184 because the RE level depends on the complexity of the procedure and the individual  
53  
54  
55 185 clinical circumstances <sup>10 18 19</sup>. There have been attempts to establish DRLs for IVR  
56  
57  
58  
59  
60

1  
2  
3  
4  
5  
6 186 procedures, where grouping by disease site may help minimize the wide distribution of  
7  
8 187 RE<sup>20 21</sup>.  
9  
10  
11  
12 188 The Japanese DRLs were established on a basis of a survey and released in 2015;  
13  
14 189 these guidelines defined the DRL value for fluoroscopically guided interventional  
15  
16 190 procedures as a fluoroscopic radiation dose rate (interventional reference point dose  
17  
18 191 rate) of 20 mGy/min<sup>12</sup>. However, it did not include information for specific procedures  
19  
20 192 in the field of gastroenterology<sup>12</sup>. Therefore, we aim to prospectively collect actual RE  
21  
22 193 data and identify the influential factors, such as disease site, in this REX-GI study and  
23  
24 194 to establish DRLs for the following interventional procedures in gastrointestinal  
25  
26 195 endoscopy units: ERCP, interventional EUS, balloon-assisted enteroscopy, enteral  
27  
28 196 metallic stent placement and enteral tube placement.  
29  
30  
31  
32  
33  
34  
35  
36  
37  
38  
39  
40  
41  
42  
43  
44  
45  
46  
47  
48  
49  
50  
51  
52  
53  
54  
55  
56  
57  
58  
59  
60

1  
2  
3  
4  
5  
6 197 **METHODS AND ANALYSIS**  
7

8 198 **Aims**  
9

10  
11 199 The primary aim of this nationwide, prospective study is to collect actual data on RE  
12  
13 200 and identify the factors affecting RE during treatments and diagnostic procedures  
14  
15  
16 201 under different types of fluoroscopic guidance for gastroenterology procedures,  
17  
18 202 including the gastrointestinal, hepatobiliary and pancreatic fields, to serve as a basis  
19  
20  
21 203 for the establishment of DRLs in Japan.  
22

23  
24 204

25  
26 205 **Design**  
27

28 206 This is a multicenter, prospective observational cohort study of consecutive patients  
29  
30  
31 207 undergoing the following 5 treatments and diagnostic procedures under fluoroscopic  
32  
33 208 guidance in the field of gastroenterology: 1) ERCP, 2) interventional EUS, 3) balloon-  
34  
35 209 assisted enteroscopy, 4) enteral metallic stent placement; and 5) enteral tube  
36  
37 210 placement. We will examine the procedure time (min), total FT (min), AK (mGy), DAP  
38  
39 211 (Gycm<sup>2</sup>), total number of roentgenography procedures, and radiation dose rate (RDR)  
40  
41 212 (mGy/min) during the procedures. The participating clinicians will manage patients  
42  
43 213 according to the usual clinical practice, and the patients will undergo the above 5  
44  
45 214 procedures. For the analysis, all data, including the related variables and outcome data  
46  
47 215 (Tables 1 and 2), will be collected for all patients. The study (Radiation EXposure from  
48  
49 216 GastroIntestinal fluoroscopic procedures: REX-GI study) was registered with the UMIN  
50  
51 217 Clinical Trials Registry at <http://www.umin.ac.jp/ctr/> under the number UMIN000036525  
52  
53 218 (registered 1 May 2019).  
54  
55  
56  
57  
58  
59  
60

1  
2  
3  
4  
5  
6 2197  
8  
9 **220 Setting**10  
11 221 The study will be conducted at 7 university hospitals, 4 cancer centers, 9 general12  
13 222 hospitals and 2 municipal hospitals in Japan. The participating hospitals are Toyonaka14  
15 223 Municipal Hospital, Kindai University, the University of Tokyo, Fukui Prefectural16  
17 224 Hospital, Kansai Rosai Hospital, Osaka City University, Ishikawa Prefectural Central18  
19 225 Hospital, Tonan Hospital, Japanese Foundation for Cancer Research, Suita Municipal20  
21 226 Hospital, Osaka Rosai Hospital, Osaka General Medical Center, Fukushima Medical22  
23 227 University School of Medicine, Hyogo Cancer Center, Kitano Hospital, Tane General24  
25 228 Hospital, Japanese Red Cross Medical Center, Kure Medical Center and Chugoku26  
27 229 Cancer Center, Nagoya City University Hospital, Toho University Ohashi Medical28  
29 230 Center, Osaka International Cancer Institute, and Gifu University Hospital (Figure 1).30  
31 231 Table 1 shows the fluoroscopic systems and units performing procedures under32  
33 232 fluoroscopic guidance in each institution. The central sites of the study are located at34  
35 233 the Toyonaka Municipal Hospital and Kindai University. The participating physicians36  
37 234 are gastroenterologists or endoscopists, including all experts and trainees working at38  
39 235 all involved hospitals. The quality of the fluoroscopic devices will be regularly monitored40  
41 236 according to the procedures in each institution.42  
43 23744  
45 238 **Study population**46  
47 239 We will include all patients receiving usual clinical care who undergo the following48  
49 240 treatments and diagnostic procedures under fluoroscopic guidance: 1) ERCP; 2)

1  
2  
3  
4  
5  
6 241 interventional EUS; 3) balloon-assisted enteroscopy; 4) enteral metallic stent  
7  
8 242 placement; and 5) enteral tube placement. There is no age restriction. We will exclude  
9  
10 243 patients who do not want to participate in this study via the *opt-out* method on each  
11  
12 244 hospital website and patients who the attending physicians judge to be unsuitable for  
13  
14 245 inclusion in this study.  
15  
16  
17  
18  
19  
20

246

### 247 **Primary outcomes**

248 The primary outcomes will be the total FT (min), RDR (mGy/min), dose-area  
249 parameters (AK (mGy) and DAP (Gycm<sup>2</sup>) and the total number of imaging studies that  
250 the patients who meet the individual inclusion and exclusion criteria will undergo (Table  
251 2).

252

### 253 **Secondary outcome**

254 The secondary outcome will be the RE-related factors that affect the radiation dose in  
255 each procedure. The details are shown in Table 3.

256

### 257 **Setting the sample size**

258 According to the preliminary questionnaire survey (data not shown), the numbers of  
259 examinations per year in the 8 centers that plan to participate in March 2019 are as  
260 follows: 4000 ERCP procedures, 125 EUS procedures, 320 small intestine endoscopy  
261 procedures, 44 esophageal stent placements, 150 gastroduodenal stent placements,  
262 75 colorectal stent placements, 180 transanal ileus tube placements, and 75 ileus tube



1  
2  
3  
4  
5  
6 263 placements. The ICRP 135 recommends using data from 20-30 facilities to set national  
7  
8 264 DRLs, and a survey for a particular examination in a facility should usually involve the  
9  
10  
11 265 collection of data from at least 20 patients <sup>11</sup>.

12  
13 266 To set the DRLs and to reduce intraprocedural variability in each hospital, we set the  
14  
15  
16 267 minimum sample size to at least 400 patients for each procedure. We believe that  
17  
18 268 initially enrolling a high number of facilities and patients is desirable; therefore, we did  
19  
20  
21 269 not set an upper limit for the goals.

22  
23  
24 270

#### 25 26 271 **Data analysis plan**

27  
28 272 After obtaining the data, we will perform normality tests. Continuous variables will be  
29  
30  
31 273 expressed as medians with interquartile ranges or means with standard deviations.

32  
33 274 The categorical variables will be expressed as numbers in each category or as  
34  
35  
36 275 frequencies. To explore surrogate markers of RD, simple linear regression analysis will  
37  
38 276 be performed to identify the relationships between procedure time, FT and RD. A  
39  
40  
41 277 multiple linear regression analysis will be performed to identify the factors related to  
42  
43 278 RD. A P value of 0.05 will be considered statistically significant. All statistical analyses  
44  
45  
46 279 will be performed with JMP software (SAS Institute, Inc., Cary, NC, USA).

47  
48  
49 280

#### 50 51 281 **Patient and public involvement**

52  
53 282 Clinical factors related to ERCP and interventional EUS have been retrospectively  
54  
55  
56 283 collected at two sites (Toyonaka Municipal Hospital and Kindai University) <sup>20 22-24</sup> . We  
57  
58  
59 284 used those published data to develop plans for the design or implementation of the  
60

1  
2  
3  
4  
5  
6 285 study and to determine the research question or the outcome measures. No patients  
7  
8 286 were asked to advise us on the interpretation or writing up of results. There are no  
9  
10 287 plans to disseminate the results of the research to study participants, but we will  
11  
12 288 consider disseminating the results of the research to the relevant patient community.  
13  
14  
15

16 289

### 18 290 **Data collection**

21 291 The clinical factors have been modified to comply with local patient flow and  
22  
23 292 administrative requirements and have been assessed and approved by the study  
24  
25 293 steering committee. We are collecting the password-protected case report forms by e-  
26  
27 294 mail from each institution; these will be de-identified after all data have been collected,  
28  
29 295 and all data queries have been addressed. A unique study identification number will  
30  
31 296 identify each participant and the associated clinical data. Data collection will be  
32  
33 297 performed at 3-month intervals to prevent data loss. Data analysis will take place at the  
34  
35 298 central study site (Kindai University). This study does not require data monitoring due  
36  
37 299 to its nature as an observational study without interventions. Data will be retained for  
38  
39 300 either a minimum of 5 years after the end of the study or for 10 years after publication,  
40  
41 301 whichever is later.  
42  
43  
44  
45  
46  
47  
48  
49

50 302

### 52 303 **Patient recruitment and schedule**

54 304 Patient recruitment will be carried out at the participating hospitals from May 2019 -  
55  
56 305 December 2020.  
57  
58  
59  
60

1  
2  
3  
4  
5  
6 306 2021: Data analysis and writing and submission of the main manuscript for publication.  
7

8  
9 307

10  
11 308 **Ethics and dissemination**

12  
13 309 This observational study will be conducted in accordance with the principles of the

14  
15  
16 310 Declaration of Helsinki, and approval has been obtained from the Institutional Review

17  
18 311 Board of Toyonaka Municipal Hospital (2019-02-04) and the institutional review board

19  
20  
21 312 of each participating facility. The need for informed consent will be waived via the *opt-*

22  
23 313 *out* method on each hospital website. The results of this study will be presented at

24  
25 314 gastroenterology-, endoscopy-, or radiology-related congresses and will be published

26  
27 315 in a peer-reviewed journal.  
28  
29  
30

31 316

32  
33 317 **Discussion**

34  
35 318 Currently, the establishment of DRLs is an international requirement for protection from

36  
37 319 medical radiation. For diagnostic radiology, national and regional DRLs are usually set

38  
39 320 at the 75% percentile of the distribution of a typical sample dose <sup>25</sup>. All physicians or

40  
41 321 medical staff who are involved in radiological imaging or procedures under fluoroscopic

42  
43 322 guidance should be familiar with the DRL process as a tool for optimizing protection. In

44  
45 323 addition, separate DRLs must be established for each country and/or region because

46  
47 324 the equipment and procedure protocols can vary among different regions <sup>25</sup>. However,

48  
49 325 the amount of RE depends on the procedure complexity, patient anatomy, lesion

50  
51 326 characteristics, disease severity <sup>11</sup> and type of fluoroscopic devices <sup>20</sup>; thus, setting the

52  
53 327 upper limit of radiation use by applying uniform standards is difficult. Generally, DRLs  
54  
55  
56  
57  
58  
59  
60

1  
2  
3  
4  
5  
6 328 are not dose limits and do not help distinguish between good and poor medical  
7  
8 329 practices <sup>25</sup>. Therefore, a high demand exists for a large amount of real-world evidence.  
9  
10 330 The 2015 Japan DRLs state that the methods for establishing DRLs not only include  
11  
12 331 setting radiation dose levels but also includes determining the dose quantities and units  
13  
14 332 used to set the DRLs, thus standardizing the methodology for dose measurements,  
15  
16 333 data collection and identification of the applications of DRLs <sup>12</sup>.  
17  
18 334 Unfortunately, most gastroenterologists are unfamiliar with not only DRLs but also  
19  
20 335 radiation protection because information on RE from gastrointestinal medical treatment  
21  
22 336 is currently very scarce, and few RE standards, including DRLs, have been established  
23  
24 337 worldwide. Given this background, the REX-GI study is planned as an observational,  
25  
26 338 nationwide study in Japan. Our results will help to promote radiation optimization and  
27  
28 339 patient radiation protection in gastroenterology studies, such as digestive endoscopy,  
29  
30 340 and hepatobiliary and pancreatic procedures.  
31  
32  
33  
34  
35  
36  
37  
38  
39  
40  
41  
42

#### 43 **Author contributions**

44  
45  
46  
47 344 Nishida T, Hayashi S (Toyonaka Municipal Hospital), and Takenaka M (Kindai  
48  
49 345 University) designed this study. Hosono M (Kindai University) critically reviewed the  
50  
51 346 protocol. Nishida T, Hayashi S (Toyonaka Municipal Hospital), Takenaka M (Kindai  
52  
53 347 University), Kogure H (The University of Tokyo), Hasatani K (Fukui Prefectural  
54  
55 348 Hospital), Yamaguchi S (Kansai Rosai Hospital), Maruyama H (Osaka City University),  
56  
57  
58  
59  
60

1  
2  
3  
4  
5  
6 349 Doyama H (Ishikawa Prefectural Central Hospita), Ihara H, (Tonan Hospital) Yoshio T  
7  
8 350 (Cancer Institute Hospital, Japanese Foundation for Cancer Research), Nagaike K  
9  
10 351 (Suita Municipal Hospital), Yamada T (Osaka-Rosai Hospital), Yakushijin T (Osaka  
11  
12 352 General Medical Center), Takagi T (Fukushima Medical University School of Medicine),  
13  
14 353 Tsumura H (Hyogo Cancer Center), Kurita A ( Kitano Hospital), Asai S (Tane General  
15  
16 354 Hospital), Ito Y (Japanese Red Cross Medical Center), Kuwai T (National Hospital  
17  
18 355 Organization, Kure Medical Center and Chugoku Cancer Center), Hori Y (Nagoya City  
19  
20 356 University Graduate School of Medical Sciences), Maetani I (Toho University Ohashi  
21  
22 357 Medical Center), Ikezawa K (Osaka International Cancer Institute), Iwashita T (Gifu  
23  
24 358 University Hospital), Matsumoto K, and Inada M (Toyonaka Municipal Hospital)  
25  
26 359 participated this study and will recruit the patients. All authors accepted the final  
27  
28 360 version of the protocol (ver. 1.1: 2019-Mar-14, ver.1.5: 2019-July-15).  
29  
30  
31  
32  
33  
34  
35  
36  
37  
38  
39

#### 362 **Acknowledgements and collaborators**

40  
41  
42 363 We thank all the collaborators who are cooperating in this first nationwide study of the  
43  
44 364 Radiation Exposure from Gastrointestinal Fluoroscopic Procedures in Japan (REX-GI).  
45  
46 365 The collaborators involved in the REX-GI study are as follows: Mitsuhiro Fujishiro  
47  
48 366 (Nagoya University Graduate School of Medicine), Masashi Yamamoto, Dai  
49  
50 367 Nakamatsu, Kaori Mukai, Kei Takahashi, Aya Sugimoto, Naoto Osugi, Yu Higaki, Ryo  
51  
52 368 Tomita, Tatsuya Sakamoto, Emi Meren, Kazuki Aochi, Shinji Kuriki, Li-sa Chang, and  
53  
54 369 Koji Fukui (Toyonaka Municipal Hospital), Yousuke Nakai (The University of Tokyo),  
55  
56  
57  
58  
59  
60

1  
2  
3  
4  
5  
6 370 Takahiro Suda (Kansai Rosai Hospital), Kazuhiro Matsunaga (Ishikawa Prefectural  
7  
8 371 Central Hospital), Tetsuya Sumiyoshi (Tonan Hospital), Takashi Sasaki, Atsuko  
9  
10  
11 372 Tamashiro, Hiroyuki Hatamori (Cancer Institute Hospital, Japanese Foundation for  
12  
13 373 Cancer Research), Takumi Kanagawa, Yuichi Yoshida, Masafumi Naito (Suita  
14  
15  
16 374 Municipal Hospital), Shuji Ishii (Osaka General Medical Center), Takuto Hikichi  
17  
18 375 (Fukushima Medical University School of Medicine), Naoki Fujimoto (Tane General  
19  
20  
21 376 Hospital), Ikuya Miki (Hyogo Cancer Center), Yuzuru Tamaru (National Hospital  
22  
23  
24 377 Organization Kure Medical Center and Chugoku Cancer Center), Hiromi Kataoka,  
25  
26 378 Kazuki Hayashi (Nagoya City University Graduate School of Medical Sciences), and  
27  
28 379 Hiroaki Shigoka (Toho University Ohashi Medical Center).

30  
31 380

32  
33 381 **Funding statement**

34  
35  
36 382 This research received clinical research grants from the Japanese Society of  
37  
38 383 Gastroenterology.

39  
40  
41  
42 384

43  
44 385 **Publication and data sharing**

45  
46  
47 386 After completion of the study, a main manuscript will be prepared to present the results  
48  
49 387 and will be submitted to a clinical journal for peer review. This study will ensure that the  
50  
51 388 public has access to the published data. A file containing the clean dataset used for the  
52  
53 389 final analysis to determine the main data of the study and an explanation of the  
54  
55 390 variables will be made publicly accessible in an anonymized format.  
56  
57  
58  
59  
60

1  
2  
3  
4  
5  
6 391

7  
8 392 **Consent for publication**

9  
10  
11 393 The principal investigators will form a publication committee, which will include key  
12  
13 394 members of this study, and the committee will grant authorship according to individual  
14  
15  
16 395 input. Investigators who do not qualify for authorship will be acknowledged by name in  
17  
18 396 the final manuscript.  
19

20  
21  
22 397

23  
24  
25  
26 398 **Conflicts of interest statement**

27  
28  
29  
30 399 None of the authors have any competing interests related to this research.  
31

32  
33 400  
34  
35  
36  
37  
38  
39  
40  
41  
42  
43  
44  
45  
46  
47  
48  
49  
50  
51  
52  
53  
54  
55  
56  
57  
58  
59  
60

Table 1. Fluoroscopic system and units performing procedures under fluoroscopic guidance

|                                       | Number of Hospital Beds | Fluoroscopy Device |                 |                |                      | Fluoroscopy Unit |
|---------------------------------------|-------------------------|--------------------|-----------------|----------------|----------------------|------------------|
|                                       |                         | Company            | Device model    | Apparatus type | Year of introduction | Location         |
| Toyonaka Municipal Hospital           | 613                     | Hitachi            | Exavista        | Over-tube      | 2016                 | Endoscopy        |
| Kindai University                     | 929                     | Hitachi            | Curevista       | Over-tube      | 2017                 | Endoscopy        |
| The University of Tokyo               | 1216                    | Hitachi            | Curevista       | Over-tube      | 2009                 | Radiology        |
|                                       |                         | Canon Toshiba      | Exavista        | Over-tube      | 2013                 |                  |
|                                       |                         | Canon Toshiba      | Ultimax-I       | Under-tube     | 2016                 |                  |
| Fukui Prefectural Hospital            | 880                     | Hitachi            | Versiflex       | Over-tube      | 2008                 | Endoscopy        |
| Kansai Rosai Hospital                 | 642                     | Canon Toshiba      | Zexira          | Over-tube      | 2011                 | Radiology        |
|                                       |                         | Canon Toshiba      | Ultimax-I       | Under-tube     | 2017                 |                  |
| Osaka City University                 | 891                     | Hitachi            | Curevista       | Over-tube      | 2011                 | Endoscopy        |
|                                       |                         | Hitachi            | Versiflex Vista | Under-tube     | 2015                 | Endoscopy        |
| Ishikawa Prefectural Central Hospital | 639                     | Canon Toshiba      | Drex-zx80       | Over-tube      | 2016                 | Endoscopy        |
| Tonan Hospital                        | 283                     | Hitachi            | Curevista       | Over-tube      | 2013                 | Radiology        |
|                                       |                         | Canon Toshiba      | ZEXIRA          | Over-tube      | 2016                 |                  |



|                                                    |     |                                |                         |                         |      |           |
|----------------------------------------------------|-----|--------------------------------|-------------------------|-------------------------|------|-----------|
| Japanese Foundation<br>for Cancer Research         | 686 | Canon Toshiba                  | Ultimax-i               | Under-tube              | 2016 | Radiology |
| Suita Municipal Hospital                           | 431 | Hitachi                        | Versiflex               | Under-tube              | 2018 | Endoscopy |
| Osaka Rosai Hospital                               | 678 | Hitachi                        | Exavista                | Under-tube              | 2018 | Radiology |
| Osaka General Medical Center                       | 768 | Hitachi<br>Hitachi             | Curevista,<br>Versiflex | Over-tube               | 2018 | Endoscopy |
| Fukushima Medical University<br>School of Medicine | 778 | Canon Toshiba<br>Canon Toshiba | Zexira<br>FPD1717       | Over-tube               | 2012 | Radiology |
| Hyogo Cancer Center                                | 400 | Hitachi                        | Curevista               | Over-tube               | 2019 | Endoscopy |
| Kitano Hospital                                    | 699 | Hitachi<br>Hitachi             | Versiflex<br>Curevista  | Under-tube<br>Over-tube | 2017 | Endoscopy |
| Tane General Hospital                              | 304 | Hitachi                        | Exavista                | Over-tube               | 2011 | Radiology |
| Japanese Red Cross Medical<br>Center               | 708 | Hitachi                        | Curevista               | Over-tube               | 2016 | Radiology |
| Kure Medical Center and<br>Chugoku Cancer Center   | 700 | Hitachi                        | Exavista                | Over-tube               | 2010 | Endoscopy |
| Nagoya City University Hospital                    | 800 | Canon Toshiba                  | Ultimax-I               | Under-tube              | 2018 | Endoscopy |
| Toho University Ohashi Medical<br>Center           | 319 | Canon Toshiba                  | Ultimax-I               | Under-tube              | 2018 | Radiology |

|                                      |     |               |                 |            |      |           |
|--------------------------------------|-----|---------------|-----------------|------------|------|-----------|
| Osaka International Cancer Institute | 500 | Canon Toshiba | Ultimax-I       | Under-tube | 2017 | Endoscopy |
| Gifu University Hospital             | 606 | Shimadzu      | C-Vision Safire | Under-tube | 2004 | Radiology |

For peer review only

Table 2. Primary outcomes

| Factors             | Variables                                                                                                                                                                                                                                                                        |
|---------------------|----------------------------------------------------------------------------------------------------------------------------------------------------------------------------------------------------------------------------------------------------------------------------------|
| Patients*           | <ul style="list-style-type: none"> <li>▪ Procedure type</li> <li>▪ Age</li> <li>▪ Sex</li> </ul>                                                                                                                                                                                 |
| Fluoroscopic system | <ul style="list-style-type: none"> <li>▪ Fluoroscopic device (company, device model, manufacturing year)</li> <li>▪ Basic use setting: frame per second (FPS), radiation field (cm<sup>2</sup>) ‡</li> </ul>                                                                     |
| Radiation exposure  | <ul style="list-style-type: none"> <li>▪ Total fluoroscopy time (FT) (min)</li> <li>▪ Air-Kerma (AK) (mGy)</li> <li>▪ Dose-area product (DAP) (Gycm<sup>2</sup>)</li> <li>▪ Total number of roentgenography procedures</li> <li>▪ Radiation dose rate (RDR) (mGy/min)</li> </ul> |

\* We will not collect patient weight or height because we will have selected patients of standard size for the Japanese population, whose weight will range from 50 to 70 kg.

‡ When the setting changes during the procedure, we will record the basic setting.

Table 3. Secondary outcomes

| Procedures | Radiation exposure-related factors                                                                                                                                                                                                                                                                                                                                                                                                                                                                                                                                                                                                                                                                                                                                                                                                                                                                                                                                                                                                                                                                                                                                       |
|------------|--------------------------------------------------------------------------------------------------------------------------------------------------------------------------------------------------------------------------------------------------------------------------------------------------------------------------------------------------------------------------------------------------------------------------------------------------------------------------------------------------------------------------------------------------------------------------------------------------------------------------------------------------------------------------------------------------------------------------------------------------------------------------------------------------------------------------------------------------------------------------------------------------------------------------------------------------------------------------------------------------------------------------------------------------------------------------------------------------------------------------------------------------------------------------|
| ERCP       | <p>(A) Surgically altered gastrointestinal anatomy<br/>Billroth I reconstruction, Billroth II reconstruction, Roux-en-Y reconstruction, pancreaticoduodenectomy</p> <p>(B) Type of endoscope</p> <p>(C) Naïve papilla</p> <p>(D) Indications for ERCP (including suspicion) are classified into the following five categories:</p> <ol style="list-style-type: none"> <li>1) Choledocholithiasis (maximum diameter, number of stones, presence of cholangitis, tube exchange for the above diseases, treatment for choledocholithiasis with or without balloon catheter, basket catheter, crusher, etc.)</li> <li>2) Distant malignant bile duct stricture (papillary tumor, distal cholangiocarcinoma, pancreatic cancer, etc.)</li> <li>3) Proximal malignant bile duct stricture (Hilar cholangiocarcinoma, intrahepatic cholangiocarcinoma, gallbladder cancer, etc.)</li> <li>4) Pancreatic duct examination (pancreas cancer, intraductal papillary mucinous neoplasm, etc.)</li> <li>5) Other diseases apart from those listed above (benign bile duct stricture, pancreatobiliary junction abnormality, etc.)</li> </ol> <p>(E) Total procedure time (min) *</p> |

|                    |                                                                                                                                                                                                                                                                                                                                                                                                                                                                                                                                                                                                                                                                                    |
|--------------------|------------------------------------------------------------------------------------------------------------------------------------------------------------------------------------------------------------------------------------------------------------------------------------------------------------------------------------------------------------------------------------------------------------------------------------------------------------------------------------------------------------------------------------------------------------------------------------------------------------------------------------------------------------------------------------|
|                    | <p>1) Cannulation time</p> <p>2) Treatment time</p> <p>(F) Experience of the high-volume endoscopist (HVE) or low-volume endoscopist: (LVE) †</p> <p>(G) Facility scale: The number of ERCP procedures per year</p> <p>(H) Whether the fluoroscopic operator is inside or outside in the fluoroscopy room</p> <p>(I) Various treatments (endoscopic sphincterotomy, stone treatment, bile duct/pancreatic stent, cytology, biopsy, naïve papilla, cannulation method, contrast agent, intubation time, first-use catheter, large balloon, crusher, drainage area or method, stent type used, cholangioscopy)</p> <p>(J) Sedation: Medication and the depth of the anesthesia ‡</p> |
| Interventional EUS | <p>(A) Indication for interventional EUS (EUS-guided hepaticogastrostomy (HGS)), choledochoduodenostomy (CDS), cyst drainage (CD), antegrade treatment (AG), rendezvous technique (RV), pancreatic duct drainage (PD)</p> <p>(B) Total procedure time‡</p> <p>    1) Endoscope insertion time</p> <p>    2) Treatment time</p> <p>(C) Facility scale: The number of EUS interventions per year, the number of EUS-guided fine-needle aspiration (FNA) procedures per year</p> <p>(D) Double stenting (presence or absence of duodenal stenosis)</p> <p>(E) Device</p> <p>(F) Scope position</p> <p>(G) Sedation: Medication and the depth of anesthesia</p>                        |

1  
2  
3  
4  
5  
6  
7  
8  
9  
10  
11  
12  
13  
14  
15  
16  
17  
18  
19  
20  
21  
22  
23  
24  
25  
26  
27  
28  
29  
30  
31  
32  
33  
34  
35  
36  
37  
38  
39  
40  
41  
42  
43  
44  
45  
46

|                                         |                                                                                                                                                                                                                                                                                                                                                                                                                  |
|-----------------------------------------|------------------------------------------------------------------------------------------------------------------------------------------------------------------------------------------------------------------------------------------------------------------------------------------------------------------------------------------------------------------------------------------------------------------|
| <p>Balloon-assisted enteroscopy</p>     | <p>(A) Disease indicating balloon-assisted enteroscopy</p> <ol style="list-style-type: none"> <li>1) Hemostatic or bleeding confirmation</li> <li>2) Crohn's disease</li> <li>3) Small intestine tumor examination</li> <li>4) Others</li> </ol> <p>(B) Insertion site: perioral or transanal</p> <p>(C) Insertion length (cm)</p> <p>(D) Total procedure time (min)</p>                                         |
| <p>Enteral metallic stent placement</p> | <p>(A) Stent location</p> <ol style="list-style-type: none"> <li>1) Esophagus (Upper/Mid-Low/Trans)</li> <li>2) Gastro-duodenum (Above pylorus/Trans pylorus /Below pylorus)</li> <li>3) Colon stent (Right/Left/Rectum)</li> </ol> <p>(B) Total procedure time (min) §</p> <ol style="list-style-type: none"> <li>1) Endoscope insertion time</li> <li>2) Treatment time</li> </ol>                             |
| <p>Enteral ileus tube placement</p>     | <p>(A) Disease indicating ileus tube</p> <p>(B) Intranasal ileus tube insertion for ileal obstruction or transanal ileus tube insertion for malignant colonic obstruction</p> <ol style="list-style-type: none"> <li>1) Tube insertion length for peroral ileus tube placement (cm)</li> <li>2) The occlusion site for the transanal tube (Right/Left/Rectum)</li> </ol> <p>(D) Total procedure time (min) §</p> |

1  
2  
3  
4  
5 ERCP: endoscopic retrograde cholangiopancreatography

6 \* Cannulation time is defined as the time from endoscope insertion until successful biliary cannulation, and treatment time is defined as  
7 the time from successful biliary cannulation until the scope is removed from the patient. The total procedure time is defined as the time  
8 from endoscope insertion until the scope is removed from the patient (cannulation time +treatment time).  
9

10 ‡ Depth of anesthesia is divided into 3 levels based on the Richmond Agitation-Sedation Scale (RASS), Ramsay Scale, and Sedation-  
11 Agitation Scale (SAS): good, poor, and very bad. The good level is defined as RASS score: -5 ~ -1, SAS score: 1 ~ 3, and Ramsay  
12 score: 3 ~ 6 equivalent, without additional unplanned doses. The poor level is defined as RASS score: 0 ~ + 1, SAS score: 4 ~ 5, and  
13 Ramsay score: 1 ~ 2, without physical restraint but with unplanned doses. The very bad level is defined as requiring physical restraint  
14 with a force considered dangerous, RASS score: +2 to +4, and SAS score: 6 to 7 regardless of Ramsay score.  
15

16 † HVE: Endoscopists with more than 200 ERCP results and who have been involved in ERCP for over 10 years. LVE: Non-HVE  
17 endoscopists who perform ERCP.  
18

19 ‡ Endoscope insertion time is defined as the time from endoscope insertion until the initial EUS-guided needle puncture, and treatment  
20 time is defined as the time from initial EUS-guided needle puncture until the scope is removed from the patient. The total procedure  
21 time is defined as the time from endoscope insertion until the scope is removed from the patient (endoscope insertion time +treatment  
22 time).  
23

24 ‡ Endoscope insertion time is defined as the time from endoscope insertion until initial guidewire exploration, and treatment time is  
25 defined as the time from initial guidewire exploration until the scope is removed from the patient. The total procedure time is defined as  
26 the time from endoscope insertion until the scope is removed from the patient (endoscope insertion time +treatment time).  
27  
28  
29  
30  
31  
32  
33  
34  
35  
36  
37  
38  
39  
40  
41  
42  
43  
44  
45  
46

1  
2  
3  
4  
5  
6 **Figure legends**  
7

8 **Figure 1.** The participating hospitals in this study.  
9  
10  
11  
12  
13  
14  
15  
16  
17  
18  
19  
20  
21  
22  
23  
24  
25  
26  
27  
28  
29  
30  
31  
32  
33  
34  
35  
36  
37  
38  
39  
40  
41  
42  
43  
44  
45  
46  
47  
48  
49  
50  
51  
52  
53  
54  
55  
56  
57  
58  
59  
60

For peer review only



## References

1. Henry MF, Maender JL, Shen Y, et al. Fluoroscopy-induced chronic radiation dermatitis: a report of three cases. *Dermatol Online J* 2009;15(1):3. [published Online First: 2009/03/14]
2. NCRP Commentary No. 27: Implications of Recent Epidemiologic Studies for the Linear-Nonthreshold Model and Radiation Protection 2018 [Available from: [https://ncrponline.org/wp-content/themes/ncrp/Pub\\_announcements/Commentary\\_No27\\_overview.pdf](https://ncrponline.org/wp-content/themes/ncrp/Pub_announcements/Commentary_No27_overview.pdf) accessed July 9th, 2019.
3. Park TH, Eichling JO, Schechtman KB, et al. Risk of radiation induced skin injuries from arrhythmia ablation procedures. *Pacing Clin Electrophysiol* 1996;19(9):1363-9. doi: 10.1111/j.1540-8159.1996.tb04216.x [published Online First: 1996/09/01]
4. de González AB, Darby S. Risk of cancer from diagnostic X-rays: estimates for the UK and 14 other countries. *The Lancet* 2004;363(9406):345-51. doi: 10.1016/s0140-6736(04)15433-0
5. Jaffe D, Bowden GT. Ionizing radiation as an initiator: effects of proliferation and promotion time on tumor incidence in mice. *Cancer Res* 1987;47(24 Pt 1):6692-6.
6. Mathews JD, Forsythe AV, Brady Z, et al. Cancer risk in 680,000 people exposed to computed tomography scans in childhood or adolescence: data linkage study of 11 million Australians. *BMJ* 2013;346:f2360. doi: 10.1136/bmj.f2360

- 1  
2  
3  
4  
5  
6 7. Khoramian D, Sistani S, Hejazi P. Establishment of diagnostic reference levels arising  
8  
9 from common CT examinations in Semnan County, Iran. *Polish Journal of*  
10  
11 *Medical Physics and Engineering* 2019;25(1):51-55. doi: 10.2478/pjmpe-2019-  
12  
13 0008  
14  
15  
16 8. Radiological protection and safety in medicine. A report of the International  
17  
18 Commission on Radiological Protection. *Ann ICRP* 1996;26(2):1-47. [published  
19  
20 Online First: 1996/01/01]  
21  
22  
23 9. The 2007 Recommendations of the International Commission on Radiological  
24  
25 Protection. ICRP publication 103. *Ann ICRP* 2007;37(2-4):1-332. doi:  
26  
27 10.1016/j.icrp.2007.10.003 [published Online First: 2007/12/18]  
28  
29  
30 10. ICRP Publication 105. Radiation protection in medicine. *Ann ICRP* 2007;37(6):1-63.  
31  
32 doi: 10.1016/j.icrp.2008.08.001 [published Online First: 2008/09/03]  
33  
34  
35 11. Vano E, Miller DL, Martin CJ, et al. ICRP Publication 135: Diagnostic Reference  
36  
37 Levels in Medical Imaging. *Ann ICRP* 2017;46(1):1-144. doi:  
38  
39 10.1177/0146645317717209 [published Online First: 2017/10/27]  
40  
41  
42  
43 12. Diagnostic Reference Levels Based on Latest Surveys in Japan -Japan DRLs 2015-  
44  
45 2015 [Available from: [http://www.radher.jp/J-](http://www.radher.jp/J-RIME/report/DRLhoukokusyoEng.pdf)  
46  
47 [RIME/report/DRLhoukokusyoEng.pdf](http://www.radher.jp/J-RIME/report/DRLhoukokusyoEng.pdf) accessed July 9th, 2019.  
48  
49  
50  
51 13. Hart D, Wall BF. UK population dose from medical X-ray examinations. *Eur J Radiol*  
52  
53 2004;50(3):285-91. doi: 10.1016/S0720-048X(03)00178-5 [published Online  
54  
55 First: 2004/05/18]  
56  
57  
58 14. Dumonceau JM, Garcia-Fernandez FJ, Verdun FR, et al. Radiation protection in  
59  
60

- 1  
2  
3  
4  
5  
6 digestive endoscopy: European Society of Digestive Endoscopy (ESGE)  
7  
8 guideline. *Endoscopy* 2012;44(4):408-21. doi: 10.1055/s-0031-1291791  
9  
10 [published Online First: 2012/03/23]  
11  
12  
13  
14 15. Hayashi S, Takenaka M, Hosono M, et al. Radiation exposure during image-guided  
15  
16 endoscopic procedures: The next quality indicator for endoscopic retrograde  
17  
18 cholangiopancreatography. *World J Clin Cases* 2018;6(16):1087-93. doi:  
19  
20 10.12998/wjcc.v6.i16.1087 [published Online First: 2019/01/08]  
21  
22  
23  
24 16. Adler DG, Lieb JG, 2nd, Cohen J, et al. Quality indicators for ERCP. *Gastrointestinal*  
25  
26 *endoscopy* 2015;81(1):54-66. doi: 10.1016/j.gie.2014.07.056 [published Online  
27  
28 First: 2014/12/07]  
29  
30  
31 17. Matsuda K, Tanaka K, Fujishiro M, et al. Design paper: Japan Endoscopy Database  
32  
33 (JED): A prospective, large database project related to gastroenterological  
34  
35 endoscopy in Japan. *Digestive endoscopy : official journal of the Japan*  
36  
37 *Gastroenterological Endoscopy Society* 2018;30(1):5-19. doi:  
38  
39 10.1111/den.12964 [published Online First: 2017/09/15]  
40  
41  
42  
43 18. Diagnostic reference levels in medical imaging: review and additional advice. *Ann*  
44  
45 *ICRP* 2001;31(4):33-52. [published Online First: 2003/04/11]  
46  
47  
48  
49 19. Lynskey GE, 3rd, Powell DK, Dixon RG, et al. Radiation protection in interventional  
50  
51 radiology: survey results of attitudes and use. *Journal of vascular and*  
52  
53 *interventional radiology : JVIR* 2013;24(10):1547-51 e3. doi:  
54  
55 10.1016/j.jvir.2013.05.039 [published Online First: 2013/07/24]  
56  
57  
58  
59 20. Hayashi S, Nishida T, Matsubara T, et al. Radiation exposure dose and influencing  
60

- factors during endoscopic retrograde cholangiopancreatography. *PloS one* 2018;13(11):e0207539. doi: 10.1371/journal.pone.0207539 [published Online First: 2018/11/20]
21. Strahlenschutz Bf. Bekanntmachung der aktualisierten diagnostischen Referenzwerte für diagnostische und interventionelle Röntgenanwendungen Vom 22. Juni 2016
- 2016 [Available from: <https://www.klinikum.uni-heidelberg.de/fileadmin/strahlenschutz/linkimages/PDF/DRW-XRay-2016-07-15.pdf> accessed Nov 9 2019.
22. Hayashi S, Nishida T, Shimakoshi H, et al. Mo2020 Novel Processing Engine for X-Ray Fluoroscopic Images (Faice-V Ns1) Can Reduce Radiation Exposure in the Procedure of ERCP But Keep the Quality of Images. *Gastrointestinal endoscopy* 2017;85(5):AB518. doi: 10.1016/j.gie.2017.03.1207
23. Hayashi S, Higaki Y, Tomita R, et al. 940 Disease Site and Processing Engine Affect Radiation Exposure Dose during Ercp. *Gastrointestinal endoscopy* 2018;87(6):AB137. doi: 10.1016/j.gie.2018.04.1348
24. Takenaka M, Hayashi S, Nishida T, et al. Mo1090 EXAMINATION OF ACTUAL RADIATION EXPOSURE DOSE OF THE PATIENTS WHO PERFORMED EUS-GUIDED DRAINAGE (EUS-BD/EUS-PD/EUS-CD). *Gastrointestinal endoscopy* 2019;89(6):AB444-AB45. doi: 10.1016/j.gie.2019.03.1247
25. Vassileva J, Rehani M. Diagnostic reference levels. *AJR Am J Roentgenol* 2015;204(1):W1-3. doi: 10.2214/AJR.14.12794 [published Online First:

1  
2  
3  
4  
5  
6  
7  
8  
9  
10  
11  
12  
13  
14  
15  
16  
17  
18  
19  
20  
21  
22  
23  
24  
25  
26  
27  
28  
29  
30  
31  
32  
33  
34  
35  
36  
37  
38  
39  
40  
41  
42  
43  
44  
45  
46  
47  
48  
49  
50  
51  
52  
53  
54  
55  
56  
57  
58  
59  
60

2014/12/30]

For peer review only

1  
2  
3  
4  
5  
6  
7  
8  
9  
10  
11  
12  
13  
14  
15  
16  
17  
18  
19  
20  
21  
22  
23  
24  
25  
26  
27  
28  
29  
30  
31  
32  
33  
34  
35  
36  
37  
38  
39  
40  
41  
42  
43  
44  
45  
46  
47  
48  
49  
50  
51  
52  
53  
54  
55  
56  
57  
58  
59  
60

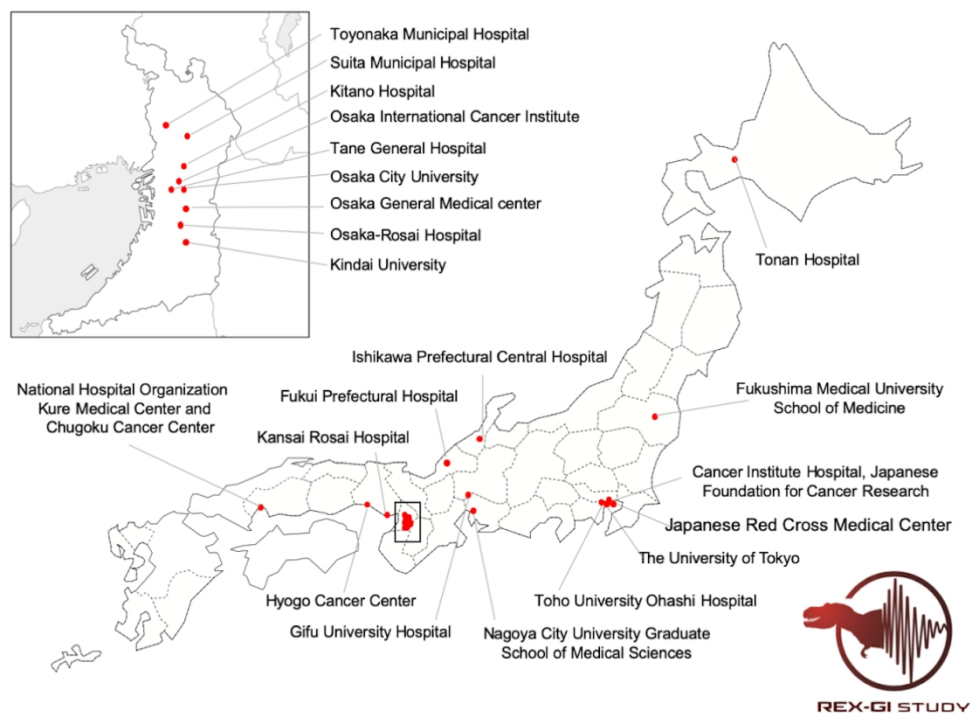

Figure 1. The participating hospitals in this study.

119x90mm (300 x 300 DPI)

# Reporting checklist for protocol of a clinical trial.

Based on the SPIRIT guidelines.

## Instructions to authors

Complete this checklist by entering the page numbers from your manuscript where readers will find each of the items listed below.

Your article may not currently address all the items on the checklist. Please modify your text to include the missing information. If you are certain that an item does not apply, please write "n/a" and provide a short explanation.

Upload your completed checklist as an extra file when you submit to a journal.

In your methods section, say that you used the SPIRIT reporting guidelines, and cite them as:

Chan A-W, Tetzlaff JM, Altman DG, Laupacis A, Gøtzsche PC, Krleža-Jerić K, Hróbjartsson A, Mann H, Dickersin K, Berlin J, Doré C, Parulekar W, Summerskill W, Groves T, Schulz K, Sox H, Rockhold FW, Rennie D, Moher D. SPIRIT 2013 Statement: Defining standard protocol items for clinical trials. *Ann Intern Med.* 2013;158(3):200-207

|                                             |                     | Reporting Item                                                                                               | Page Number |
|---------------------------------------------|---------------------|--------------------------------------------------------------------------------------------------------------|-------------|
| <b>Administrative information</b>           |                     |                                                                                                              |             |
| Title                                       | <a href="#">#1</a>  | Descriptive title identifying the study design, population, interventions, and, if applicable, trial acronym | 1           |
| Trial registration                          | <a href="#">#2a</a> | Trial identifier and registry name. If not yet registered, name of intended registry                         | 6, 11       |
| Trial registration: data set                | <a href="#">#2b</a> | All items from the World Health Organization Trial Registration Data Set                                     | 6, 11       |
| Protocol version                            | <a href="#">#3</a>  | Date and version identifier                                                                                  | 16          |
| Funding                                     | <a href="#">#4</a>  | Sources and types of financial, material, and other support                                                  | 17          |
| Roles and responsibilities: contributorship | <a href="#">#5a</a> | Names, affiliations, and roles of protocol contributors                                                      | 15          |

|    |                           |                     |                                                                    |        |
|----|---------------------------|---------------------|--------------------------------------------------------------------|--------|
| 1  | Roles and                 | <a href="#">#5b</a> | Name and contact information for the trial sponsor                 | N.A.   |
| 2  | responsibilities:         |                     |                                                                    |        |
| 3  | sponsor contact           |                     |                                                                    |        |
| 4  | information               |                     |                                                                    |        |
| 5  |                           |                     |                                                                    |        |
| 6  |                           |                     |                                                                    |        |
| 7  |                           |                     |                                                                    |        |
| 8  | Roles and                 | <a href="#">#5c</a> | Role of study sponsor and funders, if any, in study design;        | N.A.   |
| 9  | responsibilities:         |                     | collection, management, analysis, and interpretation of data;      |        |
| 10 | sponsor and funder        |                     | writing of the report; and the decision to submit the report for   |        |
| 11 |                           |                     | publication, including whether they will have ultimate authority   |        |
| 12 |                           |                     | over any of these activities                                       |        |
| 13 |                           |                     |                                                                    |        |
| 14 |                           |                     |                                                                    |        |
| 15 |                           |                     |                                                                    |        |
| 16 | Roles and                 | <a href="#">#5d</a> | Composition, roles, and responsibilities of the coordinating       | 12, 14 |
| 17 | responsibilities:         |                     | centre, steering committee, endpoint adjudication committee,       |        |
| 18 | committees                |                     | data management team, and other individuals or groups              |        |
| 19 |                           |                     | overseeing the trial, if applicable (see Item 21a for data         |        |
| 20 |                           |                     | monitoring committee)                                              |        |
| 21 |                           |                     |                                                                    |        |
| 22 |                           |                     |                                                                    |        |
| 23 |                           |                     |                                                                    |        |
| 24 | <b>Introduction</b>       |                     |                                                                    |        |
| 25 |                           |                     |                                                                    |        |
| 26 | Background and            | <a href="#">#6a</a> | Description of research question and justification for undertaking | 8-10   |
| 27 | rationale                 |                     | the trial, including summary of relevant studies (published and    |        |
| 28 |                           |                     | unpublished) examining benefits and harms for each intervention    |        |
| 29 |                           |                     |                                                                    |        |
| 30 |                           |                     |                                                                    |        |
| 31 |                           |                     |                                                                    |        |
| 32 | Background and            | <a href="#">#6b</a> | Explanation for choice of comparators                              | 9      |
| 33 | rationale: choice of      |                     |                                                                    |        |
| 34 | comparators               |                     |                                                                    |        |
| 35 |                           |                     |                                                                    |        |
| 36 |                           |                     |                                                                    |        |
| 37 | Objectives                | <a href="#">#7</a>  | Specific objectives or hypotheses                                  | 9-10   |
| 38 |                           |                     |                                                                    |        |
| 39 |                           |                     |                                                                    |        |
| 40 | Trial design              | <a href="#">#8</a>  | Description of trial design including type of trial (eg, parallel  | 11     |
| 41 |                           |                     | group, crossover, factorial, single group), allocation ratio, and  |        |
| 42 |                           |                     | framework (eg, superiority, equivalence, non-inferiority,          |        |
| 43 |                           |                     | exploratory)                                                       |        |
| 44 |                           |                     |                                                                    |        |
| 45 |                           |                     |                                                                    |        |
| 46 | <b>Methods:</b>           |                     |                                                                    |        |
| 47 | <b>Participants,</b>      |                     |                                                                    |        |
| 48 | <b>interventions, and</b> |                     |                                                                    |        |
| 49 | <b>outcomes</b>           |                     |                                                                    |        |
| 50 |                           |                     |                                                                    |        |
| 51 |                           |                     |                                                                    |        |
| 52 |                           |                     |                                                                    |        |
| 53 | Study setting             | <a href="#">#9</a>  | Description of study settings (eg, community clinic, academic      | 12     |
| 54 |                           |                     | hospital) and list of countries where data will be collected.      |        |
| 55 |                           |                     | Reference to where list of study sites can be obtained             |        |
| 56 |                           |                     |                                                                    |        |
| 57 |                           |                     |                                                                    |        |
| 58 |                           |                     |                                                                    |        |
| 59 |                           |                     |                                                                    |        |
| 60 |                           |                     |                                                                    |        |



|    |                              |                      |                                                                                                                                                                                                                                                                                                                                                                                |      |
|----|------------------------------|----------------------|--------------------------------------------------------------------------------------------------------------------------------------------------------------------------------------------------------------------------------------------------------------------------------------------------------------------------------------------------------------------------------|------|
| 1  | Eligibility criteria         | <a href="#">#10</a>  | Inclusion and exclusion criteria for participants. If applicable, eligibility criteria for study centres and individuals who will perform the interventions (eg, surgeons, psychotherapists)                                                                                                                                                                                   | 12   |
| 2  |                              |                      |                                                                                                                                                                                                                                                                                                                                                                                |      |
| 3  |                              |                      |                                                                                                                                                                                                                                                                                                                                                                                |      |
| 4  |                              |                      |                                                                                                                                                                                                                                                                                                                                                                                |      |
| 5  |                              |                      |                                                                                                                                                                                                                                                                                                                                                                                |      |
| 6  | Interventions:               | <a href="#">#11a</a> | Interventions for each group with sufficient detail to allow replication, including how and when they will be administered                                                                                                                                                                                                                                                     | N.A. |
| 7  | description                  |                      |                                                                                                                                                                                                                                                                                                                                                                                |      |
| 8  |                              |                      |                                                                                                                                                                                                                                                                                                                                                                                |      |
| 9  |                              |                      |                                                                                                                                                                                                                                                                                                                                                                                |      |
| 10 | Interventions:               | <a href="#">#11b</a> | Criteria for discontinuing or modifying allocated interventions for a given trial participant (eg, drug dose change in response to harms, participant request, or improving / worsening disease)                                                                                                                                                                               | N.A. |
| 11 | modifications                |                      |                                                                                                                                                                                                                                                                                                                                                                                |      |
| 12 |                              |                      |                                                                                                                                                                                                                                                                                                                                                                                |      |
| 13 |                              |                      |                                                                                                                                                                                                                                                                                                                                                                                |      |
| 14 |                              |                      |                                                                                                                                                                                                                                                                                                                                                                                |      |
| 15 | Interventions:               | <a href="#">#11c</a> | Strategies to improve adherence to intervention protocols, and any procedures for monitoring adherence (eg, drug tablet return; laboratory tests)                                                                                                                                                                                                                              | N.A. |
| 16 | adherence                    |                      |                                                                                                                                                                                                                                                                                                                                                                                |      |
| 17 |                              |                      |                                                                                                                                                                                                                                                                                                                                                                                |      |
| 18 |                              |                      |                                                                                                                                                                                                                                                                                                                                                                                |      |
| 19 |                              |                      |                                                                                                                                                                                                                                                                                                                                                                                |      |
| 20 | Interventions:               | <a href="#">#11d</a> | Relevant concomitant care and interventions that are permitted or prohibited during the trial                                                                                                                                                                                                                                                                                  | N.A. |
| 21 | concomitant care             |                      |                                                                                                                                                                                                                                                                                                                                                                                |      |
| 22 |                              |                      |                                                                                                                                                                                                                                                                                                                                                                                |      |
| 23 |                              |                      |                                                                                                                                                                                                                                                                                                                                                                                |      |
| 24 | Outcomes                     | <a href="#">#12</a>  | Primary, secondary, and other outcomes, including the specific measurement variable (eg, systolic blood pressure), analysis metric (eg, change from baseline, final value, time to event), method of aggregation (eg, median, proportion), and time point for each outcome. Explanation of the clinical relevance of chosen efficacy and harm outcomes is strongly recommended | 13   |
| 25 |                              |                      |                                                                                                                                                                                                                                                                                                                                                                                |      |
| 26 |                              |                      |                                                                                                                                                                                                                                                                                                                                                                                |      |
| 27 |                              |                      |                                                                                                                                                                                                                                                                                                                                                                                |      |
| 28 |                              |                      |                                                                                                                                                                                                                                                                                                                                                                                |      |
| 29 |                              |                      |                                                                                                                                                                                                                                                                                                                                                                                |      |
| 30 |                              |                      |                                                                                                                                                                                                                                                                                                                                                                                |      |
| 31 |                              |                      |                                                                                                                                                                                                                                                                                                                                                                                |      |
| 32 |                              |                      |                                                                                                                                                                                                                                                                                                                                                                                |      |
| 33 |                              |                      |                                                                                                                                                                                                                                                                                                                                                                                |      |
| 34 | Participant timeline         | <a href="#">#13</a>  | Time schedule of enrolment, interventions (including any run-ins and washouts), assessments, and visits for participants. A schematic diagram is highly recommended (see Figure)                                                                                                                                                                                               | 15   |
| 35 |                              |                      |                                                                                                                                                                                                                                                                                                                                                                                |      |
| 36 |                              |                      |                                                                                                                                                                                                                                                                                                                                                                                |      |
| 37 |                              |                      |                                                                                                                                                                                                                                                                                                                                                                                |      |
| 38 |                              |                      |                                                                                                                                                                                                                                                                                                                                                                                |      |
| 39 |                              |                      |                                                                                                                                                                                                                                                                                                                                                                                |      |
| 40 | Sample size                  | <a href="#">#14</a>  | Estimated number of participants needed to achieve study objectives and how it was determined, including clinical and statistical assumptions supporting any sample size calculations                                                                                                                                                                                          | 13   |
| 41 |                              |                      |                                                                                                                                                                                                                                                                                                                                                                                |      |
| 42 |                              |                      |                                                                                                                                                                                                                                                                                                                                                                                |      |
| 43 |                              |                      |                                                                                                                                                                                                                                                                                                                                                                                |      |
| 44 |                              |                      |                                                                                                                                                                                                                                                                                                                                                                                |      |
| 45 | Recruitment                  | <a href="#">#15</a>  | Strategies for achieving adequate participant enrolment to reach target sample size                                                                                                                                                                                                                                                                                            | 14   |
| 46 |                              |                      |                                                                                                                                                                                                                                                                                                                                                                                |      |
| 47 |                              |                      |                                                                                                                                                                                                                                                                                                                                                                                |      |
| 48 |                              |                      |                                                                                                                                                                                                                                                                                                                                                                                |      |
| 49 | <b>Methods: Assignment</b>   |                      |                                                                                                                                                                                                                                                                                                                                                                                |      |
| 50 | <b>of interventions (for</b> |                      |                                                                                                                                                                                                                                                                                                                                                                                |      |
| 51 | <b>controlled trials)</b>    |                      |                                                                                                                                                                                                                                                                                                                                                                                |      |
| 52 |                              |                      |                                                                                                                                                                                                                                                                                                                                                                                |      |
| 53 |                              |                      |                                                                                                                                                                                                                                                                                                                                                                                |      |
| 54 | Allocation: sequence         | <a href="#">#16a</a> | Method of generating the allocation sequence (eg, computer-generated random numbers), and list of any factors for stratification. To reduce predictability of a random sequence, details of any planned restriction (eg, blocking) should be                                                                                                                                   | N.A. |
| 55 | generation                   |                      |                                                                                                                                                                                                                                                                                                                                                                                |      |
| 56 |                              |                      |                                                                                                                                                                                                                                                                                                                                                                                |      |
| 57 |                              |                      |                                                                                                                                                                                                                                                                                                                                                                                |      |
| 58 |                              |                      |                                                                                                                                                                                                                                                                                                                                                                                |      |
| 59 |                              |                      |                                                                                                                                                                                                                                                                                                                                                                                |      |
| 60 |                              |                      |                                                                                                                                                                                                                                                                                                                                                                                |      |

provided in a separate document that is unavailable to those who enrol participants or assign interventions

|    |                        |                      |                                                                     |
|----|------------------------|----------------------|---------------------------------------------------------------------|
| 1  |                        |                      |                                                                     |
| 2  |                        |                      |                                                                     |
| 3  |                        |                      |                                                                     |
| 4  | Allocation             | <a href="#">#16b</a> | Mechanism of implementing the allocation sequence (eg, central      |
| 5  | concealment            |                      | telephone; sequentially numbered, opaque, sealed envelopes),        |
| 6  |                        |                      | describing any steps to conceal the sequence until interventions    |
| 7  | mechanism              |                      | are assigned                                                        |
| 8  |                        |                      |                                                                     |
| 9  |                        |                      |                                                                     |
| 10 | Allocation:            | <a href="#">#16c</a> | Who will generate the allocation sequence, who will enrol           |
| 11 | implementation         |                      | participants, and who will assign participants to interventions     |
| 12 |                        |                      |                                                                     |
| 13 |                        |                      |                                                                     |
| 14 | Blinding (masking)     | <a href="#">#17a</a> | Who will be blinded after assignment to interventions (eg, trial    |
| 15 |                        |                      | participants, care providers, outcome assessors, data analysts),    |
| 16 |                        |                      | and how                                                             |
| 17 |                        |                      |                                                                     |
| 18 |                        |                      |                                                                     |
| 19 | Blinding (masking):    | <a href="#">#17b</a> | If blinded, circumstances under which unblinding is permissible,    |
| 20 | emergency unblinding   |                      | and procedure for revealing a participant's allocated intervention  |
| 21 |                        |                      | during the trial                                                    |
| 22 |                        |                      |                                                                     |
| 23 |                        |                      |                                                                     |
| 24 |                        |                      |                                                                     |
| 25 | <b>Methods: Data</b>   |                      |                                                                     |
| 26 | <b>collection,</b>     |                      |                                                                     |
| 27 | <b>management, and</b> |                      |                                                                     |
| 28 | <b>analysis</b>        |                      |                                                                     |
| 29 |                        |                      |                                                                     |
| 30 |                        |                      |                                                                     |
| 31 |                        |                      |                                                                     |
| 32 | Data collection plan   | <a href="#">#18a</a> | Plans for assessment and collection of outcome, baseline, and       |
| 33 |                        |                      | other trial data, including any related processes to promote data   |
| 34 |                        |                      | quality (eg, duplicate measurements, training of assessors) and a   |
| 35 |                        |                      | description of study instruments (eg, questionnaires, laboratory    |
| 36 |                        |                      | tests) along with their reliability and validity, if known.         |
| 37 |                        |                      | Reference to where data collection forms can be found, if not in    |
| 38 |                        |                      | the protocol                                                        |
| 39 |                        |                      |                                                                     |
| 40 |                        |                      |                                                                     |
| 41 |                        |                      |                                                                     |
| 42 |                        |                      |                                                                     |
| 43 | Data collection plan:  | <a href="#">#18b</a> | Plans to promote participant retention and complete follow-up,      |
| 44 | retention              |                      | including list of any outcome data to be collected for participants |
| 45 |                        |                      | who discontinue or deviate from intervention protocols              |
| 46 |                        |                      |                                                                     |
| 47 |                        |                      |                                                                     |
| 48 | Data management        | <a href="#">#19</a>  | Plans for data entry, coding, security, and storage, including any  |
| 49 |                        |                      | related processes to promote data quality (eg, double data entry;   |
| 50 |                        |                      | range checks for data values). Reference to where details of data   |
| 51 |                        |                      | management procedures can be found, if not in the protocol          |
| 52 |                        |                      |                                                                     |
| 53 |                        |                      |                                                                     |
| 54 |                        |                      |                                                                     |
| 55 | Statistics: outcomes   | <a href="#">#20a</a> | Statistical methods for analysing primary and secondary             |
| 56 |                        |                      | outcomes. Reference to where other details of the statistical       |
| 57 |                        |                      | analysis plan can be found, if not in the protocol                  |
| 58 |                        |                      |                                                                     |
| 59 |                        |                      |                                                                     |
| 60 |                        |                      |                                                                     |

|    |                            |                      |                                                                    |      |
|----|----------------------------|----------------------|--------------------------------------------------------------------|------|
| 1  | Statistics: additional     | <a href="#">#20b</a> | Methods for any additional analyses (eg, subgroup and adjusted     | N.A. |
| 2  | analyses                   |                      | analyses)                                                          |      |
| 3  |                            |                      |                                                                    |      |
| 4  | Statistics: analysis       | <a href="#">#20c</a> | Definition of analysis population relating to protocol non-        | 15   |
| 5  | population and missing     |                      | adherence (eg, as randomised analysis), and any statistical        |      |
| 6  | data                       |                      | methods to handle missing data (eg, multiple imputation)           |      |
| 7  |                            |                      |                                                                    |      |
| 8  |                            |                      |                                                                    |      |
| 9  |                            |                      |                                                                    |      |
| 10 | <b>Methods: Monitoring</b> |                      |                                                                    |      |
| 11 |                            |                      |                                                                    |      |
| 12 | Data monitoring:           | <a href="#">#21a</a> | Composition of data monitoring committee (DMC); summary of         | 15   |
| 13 | formal committee           |                      | its role and reporting structure; statement of whether it is       |      |
| 14 |                            |                      | independent from the sponsor and competing interests; and          |      |
| 15 |                            |                      | reference to where further details about its charter can be found, |      |
| 16 |                            |                      | if not in the protocol. Alternatively, an explanation of why a     |      |
| 17 |                            |                      | DMC is not needed                                                  |      |
| 18 |                            |                      |                                                                    |      |
| 19 |                            |                      |                                                                    |      |
| 20 |                            |                      |                                                                    |      |
| 21 |                            |                      |                                                                    |      |
| 22 | Data monitoring:           | <a href="#">#21b</a> | Description of any interim analyses and stopping guidelines,       | 15   |
| 23 | interim analysis           |                      | including who will have access to these interim results and make   |      |
| 24 |                            |                      | the final decision to terminate the trial                          |      |
| 25 |                            |                      |                                                                    |      |
| 26 |                            |                      |                                                                    |      |
| 27 | Harms                      | <a href="#">#22</a>  | Plans for collecting, assessing, reporting, and managing solicited | N.A. |
| 28 |                            |                      | and spontaneously reported adverse events and other unintended     |      |
| 29 |                            |                      | effects of trial interventions or trial conduct                    |      |
| 30 |                            |                      |                                                                    |      |
| 31 |                            |                      |                                                                    |      |
| 32 |                            |                      |                                                                    |      |
| 33 | Auditing                   | <a href="#">#23</a>  | Frequency and procedures for auditing trial conduct, if any, and   | N.A. |
| 34 |                            |                      | whether the process will be independent from investigators and     |      |
| 35 |                            |                      | the sponsor                                                        |      |
| 36 |                            |                      |                                                                    |      |
| 37 |                            |                      |                                                                    |      |
| 38 | <b>Ethics and</b>          |                      |                                                                    |      |
| 39 | <b>dissemination</b>       |                      |                                                                    |      |
| 40 |                            |                      |                                                                    |      |
| 41 |                            |                      |                                                                    |      |
| 42 | Research ethics            | <a href="#">#24</a>  | Plans for seeking research ethics committee / institutional review | 15   |
| 43 | approval                   |                      | board (REC / IRB) approval                                         |      |
| 44 |                            |                      |                                                                    |      |
| 45 |                            |                      |                                                                    |      |
| 46 | Protocol amendments        | <a href="#">#25</a>  | Plans for communicating important protocol modifications (eg,      | N.A. |
| 47 |                            |                      | changes to eligibility criteria, outcomes, analyses) to relevant   |      |
| 48 |                            |                      | parties (eg, investigators, REC / IRBs, trial participants, trial  |      |
| 49 |                            |                      | registries, journals, regulators)                                  |      |
| 50 |                            |                      |                                                                    |      |
| 51 |                            |                      |                                                                    |      |
| 52 |                            |                      |                                                                    |      |
| 53 | Consent or assent          | <a href="#">#26a</a> | Who will obtain informed consent or assent from potential trial    | 15   |
| 54 |                            |                      | participants or authorised surrogates, and how (see Item 32)       |      |
| 55 |                            |                      |                                                                    |      |
| 56 |                            |                      |                                                                    |      |
| 57 |                            |                      |                                                                    |      |
| 58 |                            |                      |                                                                    |      |
| 59 |                            |                      |                                                                    |      |
| 60 |                            |                      |                                                                    |      |

|    |                          |                      |                                                                      |        |
|----|--------------------------|----------------------|----------------------------------------------------------------------|--------|
| 1  | Consent or assent:       | <a href="#">#26b</a> | Additional consent provisions for collection and use of              | N.A.   |
| 2  | ancillary studies        |                      | participant data and biological specimens in ancillary studies, if   |        |
| 3  |                          |                      | applicable                                                           |        |
| 4  |                          |                      |                                                                      |        |
| 5  |                          |                      |                                                                      |        |
| 6  | Confidentiality          | <a href="#">#27</a>  | How personal information about potential and enrolled                | 14     |
| 7  |                          |                      | participants will be collected, shared, and maintained in order to   |        |
| 8  |                          |                      | protect confidentiality before, during, and after the trial          |        |
| 9  |                          |                      |                                                                      |        |
| 10 |                          |                      |                                                                      |        |
| 11 | Declaration of interests | <a href="#">#28</a>  | Financial and other competing interests for principal investigators  | 17, 18 |
| 12 |                          |                      | for the overall trial and each study site                            |        |
| 13 |                          |                      |                                                                      |        |
| 14 |                          |                      |                                                                      |        |
| 15 | Data access              | <a href="#">#29</a>  | Statement of who will have access to the final trial dataset, and    | 17     |
| 16 |                          |                      | disclosure of contractual agreements that limit such access for      |        |
| 17 |                          |                      | investigators                                                        |        |
| 18 |                          |                      |                                                                      |        |
| 19 |                          |                      |                                                                      |        |
| 20 | Ancillary and post trial | <a href="#">#30</a>  | Provisions, if any, for ancillary and post-trial care, and for       | N.A.   |
| 21 | care                     |                      | compensation to those who suffer harm from trial participation       |        |
| 22 |                          |                      |                                                                      |        |
| 23 |                          |                      |                                                                      |        |
| 24 | Dissemination policy:    | <a href="#">#31a</a> | Plans for investigators and sponsor to communicate trial results     | 14     |
| 25 | trial results            |                      | to participants, healthcare professionals, the public, and other     |        |
| 26 |                          |                      | relevant groups (eg, via publication, reporting in results           |        |
| 27 |                          |                      | databases, or other data sharing arrangements), including any        |        |
| 28 |                          |                      | publication restrictions                                             |        |
| 29 |                          |                      |                                                                      |        |
| 30 |                          |                      |                                                                      |        |
| 31 |                          |                      |                                                                      |        |
| 32 |                          |                      |                                                                      |        |
| 33 | Dissemination policy:    | <a href="#">#31b</a> | Authorship eligibility guidelines and any intended use of            | 18     |
| 34 | authorship               |                      | professional writers                                                 |        |
| 35 |                          |                      |                                                                      |        |
| 36 |                          |                      |                                                                      |        |
| 37 | Dissemination policy:    | <a href="#">#31c</a> | Plans, if any, for granting public access to the full protocol,      | N.A.   |
| 38 | reproducible research    |                      | participant-level dataset, and statistical code                      |        |
| 39 |                          |                      |                                                                      |        |
| 40 |                          |                      |                                                                      |        |
| 41 | <b>Appendices</b>        |                      |                                                                      |        |
| 42 |                          |                      |                                                                      |        |
| 43 | Informed consent         | <a href="#">#32</a>  | Model consent form and other related documentation given to          | N.A.   |
| 44 | materials                |                      | participants and authorised surrogates                               |        |
| 45 |                          |                      |                                                                      |        |
| 46 |                          |                      |                                                                      |        |
| 47 | Biological specimens     | <a href="#">#33</a>  | Plans for collection, laboratory evaluation, and storage of          | N.A.   |
| 48 |                          |                      | biological specimens for genetic or molecular analysis in the        |        |
| 49 |                          |                      | current trial and for future use in ancillary studies, if applicable |        |
| 50 |                          |                      |                                                                      |        |
| 51 |                          |                      |                                                                      |        |

None The SPIRIT checklist is distributed under the terms of the Creative Commons Attribution License CC-BY-ND 3.0. This checklist can be completed online using <https://www.goodreports.org/>, a tool made by the [EQUATOR Network](#) in collaboration with [Penelope.ai](#)
